# Supplementary material for: A nucleosome turnover map reveals that the stability of histone H4 Lys20 methylation depends on histone recycling in transcribed chromatin
Source: PubMed Central journal article supplement — Genome Res. 2015 Jun;25(6):872–83. doi: 10.1101/gr.188870.114 (PMC4448683; doi:10.1101/gr.188870.114), 2015-06
Supplement: supp_gr.188870.114_Supplemental_Tables.pdf [file supp_gr.188870.114_Supplemental_Tables.pdf]

**Table S1. Genes associated with H4K20me1, me2 and me3**

| <b>Systematic name</b> | <b>Description</b>                                                   | <b>H4K20<br/>me1</b> |               |                                                                             |      |
|------------------------|----------------------------------------------------------------------|----------------------|---------------|-----------------------------------------------------------------------------|------|
| SPBC1348.10c           | phospholipase (predicted)                                            | 3.81                 | SPAC17H9.16   | mitochondrial TOM complex subunit Tom22 (predicted)                         | 1.54 |
| SPCC4B3.12             | histone lysine methyltransferase Set9                                | 2.69                 | SPAC17A2.07c  | sequence orphan                                                             | 1.54 |
| SPBC9B6.02c            | retrotransposable element/transposon Tf2-type                        | 2.55                 | SPAC3A12.04c  | RNase P and RNase MRP subunit p30 (predicted)                               | 1.53 |
| SPAC13G6.04            | TIM22 inner membrane protein import complex subunit Tim8 (predicted) | 2.51                 | SPAC17G8.05   | mediator complex subunit Med20                                              | 1.49 |
| SPBC29A10.13           | F0-ATPase subunit D (predicted)                                      | 2.16                 | SPBC9B6.04c   | mitochondrial translation elongation factor EF-Tu Tuf1                      | 1.47 |
| SPBC3B9.10             | SNARE Vti1 (predicted)                                               | 1.99                 | SPBC16A3.14   | superoxide dismutase%2C mitochondrial ribosomal protein subunit (predicted) | 1.45 |
| SPAC9G1.15c            | mitotic spindle organizing protein Mzt1 (predicted)                  | 1.98                 | SPBC4C3.04c   | guanyl-nucleotide exchange factor (predicted)                               | 1.43 |
| SPAC11E3.04c           | ubiquitin conjugating enzyme Ubc13                                   | 1.96                 | SPAC3C7.14c   | ubiquitinated histone-like protein Uhp1                                     | 1.43 |
| SPAC26A3.11            | amidohydrolase                                                       | 1.94                 | SPAC20G8.07c  | C-8 sterol isomerase Erg2                                                   | 1.41 |
| SPBC3B9.22c            | DASH complex subunit Dad4                                            | 1.89                 | SPBC106.15    | isopentenyl-diphosphate delta-isomerase Idi1                                | 1.40 |
| SPCC18.19c             | oligosaccharyltransferase complex zeta subunit Ost5 (predicted)      | 1.89                 | SPBC17D11.07c | 19S proteasome regulatory subunit Rpn2 (predicted)                          | 1.39 |
| SPAC22F3.15            | GatB/YqeY domain protein                                             | 1.78                 | SPBC646.06c   | glucan endo-1%2C3-alpha-glucosidase Agn2                                    | 1.37 |
| SPBC725.17c            | RNA polymerase I transcription factor subunit Rrn11 (predicted)      | 1.77                 | SPAC637.10c   | 19S proteasome regulatory subunit Rpn10                                     | 1.37 |
| SPAC17H9.17c           | Mdm10/Mdm12/Mmm1 complex subunit Mdm10 (predicted)                   | 1.73                 | SPAC6B12.06c  | mitochondrial genome maintenance protein Rrg9 (predicted)                   | 1.37 |
| SPAPB1A10.03           | mRNA export receptor Nxt1                                            | 1.71                 | SPAC1527.02   | Golgi transport protein Sft2 (predicted)                                    | 1.37 |
| SPBC15D4.11c           | mitochondrial Mam33 family protein (predicted)                       | 1.70                 | SPAPB17E12.02 | SMN family protein Yip12                                                    | 1.34 |
| SPBC1604.11            | F0-ATPase subunit F (predicted)                                      | 1.68                 | SPBC2G5.04c   | COPII-coated vesicle component Erv41 (predicted)                            | 1.34 |
| SPAC589.11             | mitochondrial translation release factor (predicted)                 | 1.66                 | SPAC1805.08   | dynein light chain Dlc1                                                     | 1.34 |
| SPCC1620.13            | phosphoglycerate mutase family (predicted)                           | 1.62                 | SPAC8C9.19    | conserved fungal protein                                                    | 1.34 |
| SPCC18.16c             | riboflavin kinase Fmn1                                               | 1.56                 | SPAC25H1.05   | sequence orphan                                                             | 1.31 |

|               |                                           |      |               |                                            |      |
|---------------|-------------------------------------------|------|---------------|--------------------------------------------|------|
| SPAC4G9.15    | ketoreductase (predicted)                 | 1.31 |               | transporter                                |      |
| SPCC1906.04   | wtf element Wtf20                         | 1.30 | SPBC30D10.09c | HVA22/TB2/DP1 family protein               | 1.20 |
| SPBC776.03    | homoserine dehydrogenase (predicted)      | 1.30 | SPAC1751.03   | translation initiation factor eIF3m        | 1.19 |
| SPBP19A11.03c | 19S proteasome regulatory subunit Mts4    | 1.30 | SPCC364.06    | nucleosome assembly protein Nap1           | 1.19 |
| SPAC4D7.06c   | siroheme synthase (predicted)             | 1.29 |               | DNA replication factor C complex subunit   |      |
| SPBC1198.02   | adenine deaminase Dea2                    | 1.29 | SPAC27E2.10c  | Rfc3                                       | 1.19 |
| SPAC15A10.12c | TRAPP complex subunit 2-like (predicted)  | 1.29 |               | protein phosphatase type 2A regulator%2C   |      |
|               | mitochondrial heatshock protein Hsp78     |      | SPAC1782.05   | PTPA family Ypa2                           | 1.18 |
| SPBC4F6.17c   | (predicted)                               | 1.28 | SPBP23A10.02  | V-ATPase assembly factor Pkr1 (predicted)  | 1.17 |
| SPAC1B1.03c   | karyopherin Kap95                         | 1.27 | SPCC1450.06c  | monothiol glutaredoxin Grx3                | 1.16 |
|               | snoRNP pseudouridylase box H/ACA          |      | SPCC645.14c   | chaperone activator Sti1 (predicted)       | 1.16 |
| SPAP27G11.13c | snoRNP complex protein (predicted)        | 1.27 |               | conserved fungal protein%2C with meiosis   |      |
| SPAC664.13    | sequence orphan                           | 1.26 | SPAPB8E5.10   | specific splicing                          | 1.16 |
| SPAC17G8.02   | uridine ribohydrolase (predicted)         | 1.26 | SPAC22G7.03   | sequence orphan                            | 1.16 |
| SPAC16A10.05c | DASH complex subunit Dad1                 | 1.24 | SPAC23H4.18c  | RING-box protein 1                         | 1.16 |
|               | mitochondrial ribosomal protein subunit   |      |               | DNA-directed RNA polymerase I complex      |      |
| SPCC1739.02c  | L22 (predicted)                           | 1.23 | SPBC4C3.05c   | large subunit Nuc1                         | 1.16 |
|               | 1-acylglycerol-3-phosphate O-             |      | SPBC30D10.05c | sepiapterin reductase (predicted)          | 1.16 |
| SPAC1851.02   | acyltransferase Slc1 (predicted)          | 1.23 | SPCC1827.08c  | F-box protein Pof7                         | 1.16 |
|               | RNA polymerase I transcription            |      | SPBC16A3.03c  | mitochondrial PPR repeat protein Ppr7      | 1.15 |
| SPBC1198.11c  | termination factor Reb1                   | 1.23 | SPCC550.14    | vigilin (predicted)                        | 1.15 |
|               | cytoplasmic proline-tRNA ligase Prs1      |      | SPAC23D3.04c  | glycerol-3-phosphate dehydrogenase Gpd2    | 1.14 |
| SPBC19C7.06   | (predicted)                               | 1.22 | SPAC26A3.05   | clathrin heavy chain Chc1 (predicted)      | 1.14 |
|               | ribosome biogenesis ATPase%2C Arb         |      | SPAC16A10.06c | Smc5-6 complex non-SMC subunit 2           | 1.14 |
| SPBC16H5.08c  | family ABCF2-like (predicted)             | 1.22 |               | armadillo repeat protein%2C involved in    |      |
|               | retrotransposable element/transposon Tf2- |      |               | ribosomal large subunit biogenesis         |      |
| SPAC2E1P3.03c | type                                      | 1.22 | SPBC1703.03c  | (predicted)                                | 1.14 |
| SPAC3G9.02    | 3-oxoacyl-                                | 1.22 |               | NatA N-acetyltransferase complex catalytic |      |
| SPAC17G6.14c  | ATP-dependent RNA helicase Uap56          | 1.22 | SPAC15E1.08   | subunit Naa10 (predicted)                  | 1.14 |
| SPAP8A3.08    | myosin II light chain                     | 1.21 |               | U1 snRNP-associated protein Usp103         |      |
| SPAPB1A10.16  | conserved fungal protein                  | 1.21 | SPBP35G2.09   | (predicted)                                | 1.13 |
| SPAC977.04    | truncated C terminal region of membrane   | 1.21 | SPBC405.05    | sequence orphan                            | 1.13 |

|               |                                                               |      |              |                                            |      |
|---------------|---------------------------------------------------------------|------|--------------|--------------------------------------------|------|
| SPBC25B2.04c  | mitochondrial GTPase involved in translation Mtg1 (predicted) | 1.13 | SPAC977.12   | subunit Rpb4                               |      |
|               | anaphase-promoting complex subunit                            |      | SPAC17A5.15c | L-asparaginase (predicted)                 | 1.09 |
| SPAC27D7.05c  | Apc14                                                         | 1.13 | SPAC17G8.06c | glutamate-tRNA ligase (predicted)          | 1.09 |
|               | mitochondrial ribosomal protein subunit L4                    |      |              | dihydroxy-acid dehydratase (predicted)     | 1.09 |
| SPCC4G3.06c   | (predicted)                                                   | 1.13 | SPAC1F7.05   | ribonucleoside reductase large subunit     |      |
|               | dihydrolipoamide S-acetyltransferase                          |      | SPAC4G9.11c  | Cdc22                                      | 1.09 |
| SPCC794.07    | E2%2C Lat1 (predicted)                                        | 1.13 | SPBC1105.09  | cytosine-mismatch binding protein 1        | 1.08 |
| SPAC26A3.08   | Sm snRNP core protein Smb1                                    | 1.13 | SPCC5E4.05c  | ubiquitin conjugating enzyme Ubc15         | 1.08 |
| SPBC32F12.03c | glutathione peroxidase Gpx1                                   | 1.12 |              | mitochondrial serine hydrolase (predicted) | 1.08 |
| SPBC800.09    | G2/M transition checkpoint protein Sum2                       | 1.12 | SPBC337.04   | serine/threonine protein kinase Ppk27      |      |
| SPBC14F5.03c  | karyopherin Kap123                                            | 1.12 |              | (predicted)                                | 1.08 |
| SPAC25B8.17   | ER signal peptide peptidase (predicted)                       | 1.12 | SPBC11C11.08 | SR family protein%2C human SRFS2           |      |
|               | cytoplasmic isoleucine-tRNA ligase Irs1                       |      | SPBC1604.20c | ortholog Srp1                              | 1.08 |
| SPBC8D2.06    | (predicted)                                                   | 1.11 |              | kinesin-like protein Tea2                  | 1.08 |
| SPBC21C3.06   | sequence orphan                                               | 1.11 | SPAC23G3.11  | 19S proteasome regulatory subunit Rpn6     |      |
| SPCC74.05     | 60S ribosomal protein L27 (predicted)                         | 1.11 |              | (predicted)                                | 1.07 |
|               | actin cortical patch component%2C with                        |      | SPAC8C9.11   | transcriptional repressor protein Bola     |      |
| SPAC25G10.09c | EF hand and WH2 motif Pan1 (predicted)                        | 1.11 | SPBC646.10c  | domain (predicted)                         | 1.07 |
| SPAC16E8.18   | sequence orphan                                               | 1.11 |              | U3 snoRNP protein Nop56 (predicted)        | 1.07 |
|               | sequence orphan%2C localizing to double                       |      | SPAC4F8.10c  | SM22/transgelin-like actin modulating      |      |
| SPBC651.12c   | strand breaks Dbp7                                            | 1.11 |              | protein Stg1                               | 1.07 |
|               | 19S proteasome regulatory subunit Rpn8                        |      | SPAC26F1.14c | apoptosis-inducing factor homolog Aif1     |      |
| SPCC1682.10   | (predicted)                                                   | 1.11 |              | (predicted)                                | 1.07 |
| SPBC1604.05   | glucose-6-phosphate isomerase (predicted)                     | 1.11 | SPBC3E7.12c  | chitin synthase regulatory factor Cfh4     |      |
|               | Cdc14-related protein phosphatase                             |      |              | (predicted)                                | 1.07 |
| SPAC1782.09c  | Clp1/Flp1                                                     | 1.10 | SPBC23G7.12c | 19S proteasome regulatory subunit Rpt6     |      |
|               | CCR4-Not complex subunit Ccr4                                 |      |              | (predicted)                                | 1.07 |
| SPCC31H12.08c | (predicted)                                                   | 1.10 | SPBP23A10.07 | DNA-directed RNA polymerase I complex      |      |
| SPCC23B6.04c  | sec14 cytosolic factor family (predicted)                     | 1.10 |              | subunit Rpa2                               | 1.07 |
| SPAC26A3.12c  | 5'-3' exoribonuclease Dhp1                                    | 1.10 | SPAC1687.12c | ubiquinone biosynthesis protein Coq4       |      |
| SPBC337.14    | DNA-directed RNA polymerase II complex                        | 1.09 | SPBC29A3.15c | (predicted)                                | 1.06 |
|               |                                                               |      |              | mitochondrial ribosomal protein subunit    | 1.06 |

|              |                                                                    |      |               |                                                                                |      |
|--------------|--------------------------------------------------------------------|------|---------------|--------------------------------------------------------------------------------|------|
|              | S23 (predicted)                                                    |      |               | subunit Cct6                                                                   |      |
| SPCC1672.05c | cytoplasmic tyrosine-tRNA ligase Yrs1 (predicted)                  | 1.06 | SPBC21H7.07c  | imidazoleglycerol-phosphate dehydratase His5                                   | 1.02 |
| SPCC1739.01  | zf-CCCH type zinc finger protein                                   | 1.06 |               | mitochondrial inner membrane organizing system protein (predicted)             | 1.02 |
| SPAC1687.01  | DNA-directed RNA polymerase I and III subunit Rpc19                | 1.06 | SPAPJ691.03   | cytochrome c oxidase subunit V (predicted)                                     | 1.02 |
| SPAC13G6.11c | mevalonate kinase Erg12 (predicted)                                | 1.06 | SPCC338.10c   | autophagy associated ubiquitin-like modifier Atg12                             | 1.02 |
| SPBC215.09c  | acetyl-CoA C-acetyltransferase Erg10 (predicted)                   | 1.06 | SPAC1783.06c  | translation release factor class II eRF3                                       | 1.01 |
| SPBC17G9.11c | pyruvate carboxylase Pyr1                                          | 1.06 | SPCC584.04    | inosine-uridine preferring nucleoside hydrolase (predicted)                    | 1.01 |
| SPCC70.08c   | methyltransferase (predicted)                                      | 1.05 | SPBC800.11    | thioredoxin peroxidase (predicted)                                             | 1.01 |
| SPCC777.08c  | TORC2 subunit Bit61                                                | 1.05 | SPBC1773.02c  | acireductone dioxygenase family (predicted)                                    | 1.01 |
| SPAC26F1.13c | cytoplasmic leucine-tRNA ligase Lrs1 (predicted)                   | 1.05 | SPBC887.01    | Puf family RNA-binding protein Puf6 (predicted)                                | 1.01 |
| SPAC17G6.15c | MTC tricarboxylate transporter (predicted)                         | 1.05 | SPCP1E11.11   | ubiquinol-cytochrome-c reductase complex core protein Qcr2 (predicted)         | 1.01 |
| SPBC336.02   | 18S rRNA dimethylase (predicted)                                   | 1.05 | SPCC613.10    | translation initiation factor eIF3a                                            | 1.00 |
| SPCC285.12   | U6 snRNP-associated protein Lsm7 (predicted)                       | 1.05 | SPBC17D11.05  | tRNA (guanine-N2-)-methyltransferase                                           | 1.00 |
| SPBC215.06c  | human LYAR homolog                                                 | 1.05 | SPBC25D12.05  | sequence orphan                                                                | 1.00 |
| SPBC14C8.06  | ARP2/3 actin-organizing complex subunit Sop2                       | 1.05 | SPBC21B10.02  | ribosome biogenesis protein Brx1 (predicted)                                   | 1.00 |
| SPAC4F10.12  | CENP-L homolog Fta1                                                | 1.04 | SPBC800.06    | mitochondrial processing peptidase (MPP) complex beta subunit Qcr1 (predicted) | 1.00 |
| SPAC56F8.08  | UBA domain protein Mud1                                            | 1.04 | SPBP23A10.15c | MAP kinase kinase kinase Win1                                                  | 1.00 |
| SPCC320.11c  | RNA-binding protein involved in ribosome biogenesis (predicted)    | 1.04 | SPAC1006.09   | Rheb GTPase Rhb1                                                               | 0.99 |
| SPAC26F1.03  | pyruvate dehydrogenase e1 component alpha subunit Pda1 (predicted) | 1.03 | SPBC428.16c   | checkpoint clamp complex protein Hus1                                          | 0.99 |
| SPBC1683.06c | uridine ribohydrolase (predicted)                                  | 1.03 | SPAC20G4.04c  | diadenosine 5'-p1%2C5"-p1%2Cp6-                                                |      |
| SPCC663.15c  | conserved fungal protein                                           | 1.03 | SPAC13G6.14   | hexaphosphate hydrolase Aps1                                                   | 0.99 |
| SPAC3C7.08c  | AAA family ATPase Elf1                                             | 1.03 | SPAP7G5.02c   | GMP synthase                                                                   | 0.99 |
| SPAC4A8.11c  | fatty acid synthase alpha subunit Lsd1                             | 1.03 | SPAC12B10.02c | endoplasmic reticulum resident protein                                         | 0.99 |
| SPBC646.11   | chaperonin-containing T-complex zeta                               | 1.03 |               |                                                                                |      |

|               |                                                                                   |      |               |                                                                                               |      |
|---------------|-----------------------------------------------------------------------------------|------|---------------|-----------------------------------------------------------------------------------------------|------|
|               | required for packaging into COPII vesicles (predicted)                            |      | SPAC15E1.02c  | DUF1761 family protein                                                                        | 0.96 |
| SPAC227.18    | saccharopine dehydrogenase Lys3                                                   | 0.99 | SPBC26H8.08c  | GTPase Grn1                                                                                   | 0.96 |
| SPCC16C4.05   | RNase P and RNase MRP subunit (predicted)                                         | 0.98 | SPBP4H10.15   | aconitate hydratase/mitochondrial ribosomal protein subunit L49%2C fusion protein (predicted) | 0.96 |
| SPCC1223.15c  | DASH complex subunit Spc19                                                        | 0.98 | SPBC28F2.12   | RNA polymerase II large subunit Rpb1                                                          | 0.96 |
| SPBC18E5.02c  | serine palmitoyltransferase complex subunit (predicted)                           | 0.98 | SPAC323.02c   | 20S proteasome complex subunit alpha 5%2C Pup2 (predicted)                                    | 0.96 |
| SPAC23C11.12  | anaphase-promoting complex subunit Hcn1                                           | 0.98 |               | 3-methyl-2-oxobutanoatehydroxymethyltransferase (predicted)                                   | 0.96 |
| SPAC20G8.06   | CCR4-Not complex subunit Not1 (predicted)                                         | 0.98 | SPAC5H10.09c  | signal recognition particle receptor beta subunit Srp102 (predicted)                          | 0.96 |
| SPBC646.09c   | eIF3e subunit Int6                                                                | 0.98 | SPAC23H4.07c  | phospho-2-dehydro-3-deoxyheptonate aldolase (predicted)                                       | 0.96 |
| SPCC777.09c   | acetylornithine aminotransferase translation initiation factor eIF2 alpha subunit | 0.98 | SPAC24H6.10c  | COPII-coated vesicle component Sec31 (predicted)                                              | 0.95 |
| SPAC3G9.09c   | phosphomannomutase Pmm1                                                           | 0.98 | SPBC8D2.20c   | alanine aminotransferase (predicted)                                                          | 0.95 |
| SPAC1556.07   | cytidine deaminase Ccd1 (predicted)                                               | 0.98 | SPBC582.08    | cytoplasmic valine-tRNA ligase Vrs1/Vas1                                                      | 0.95 |
| SPAC1556.04c  | export adaptor Nmd3 (predicted)                                                   | 0.98 | SPBC1709.02c  | mitochondrial ribosomal protein subunit L13 (predicted)                                       | 0.95 |
| SPAC16C9.03   | iron transport multicopper oxidase Fio1                                           | 0.98 |               | 3-oxoacyl-HDEL receptor (predicted)                                                           | 0.95 |
| SPAC1F7.08    | protein tyrosine phosphatase Stp1                                                 | 0.97 |               | hydrolase (predicted)                                                                         | 0.95 |
| SPAC1071.12c  | ubiquitin/metalloprotease fusion protein (predicted)                              | 0.97 | SPBC16G5.04   | NADP-specific glutamate dehydrogenase                                                         | 0.95 |
| SPCC1442.07c  | uracil phosphoribosyltransferase (predicted)                                      | 0.97 | SPAC922.06    | Gdh1 (predicted)                                                                              | 0.95 |
| SPAC1B3.01c   | karyopherin Sal3                                                                  | 0.97 | SPBP8B7.22    | dubious                                                                                       | 0.95 |
| SPCC1840.03   | ubiquinone biosynthesis protein Coq7                                              | 0.97 | SPAC1F8.04c   | COP9/signalosome complex subunit Csn4                                                         | 0.95 |
| SPBC337.15c   | sequence orphan                                                                   | 0.97 |               | ER membrane protein complex subunit 4 (predicted)                                             | 0.95 |
| SPAC13G6.13   | elongin C (predicted)                                                             | 0.97 | SPCC622.12c   | ribulose phosphate 3-epimerase (predicted)                                                    | 0.95 |
| SPBC1861.07   | xrcc4 like factor%2C cernunnon                                                    | 0.97 | SPAC9E9.17c   | transcription elongation regulator                                                            | 0.94 |
| SPCC24B10.14c | iron-sulfur cluster biogenesis protein (predicted)                                | 0.97 | SPAC22A12.03c |                                                                                               |      |
| SPAC21E11.07  | sequence orphan                                                                   | 0.96 | SPCC1281.03c  |                                                                                               |      |
| SPBC4B4.12c   | phosphoglucomutase (predicted)                                                    | 0.96 | SPAC31G5.05c  |                                                                                               |      |
| SPBC32F12.10  |                                                                                   |      | SPCC645.13    |                                                                                               |      |

|               |                                              |      |               |                                           |      |
|---------------|----------------------------------------------|------|---------------|-------------------------------------------|------|
|               | (predicted)                                  |      | SPAC22A12.06c | serine hydrolase-like                     | 0.92 |
|               | tRNA dihydrouridine synthase Dus4            |      |               | 3-oxo-5-alpha-steroid 4-dehydrogenase     |      |
| SPCC777.15    | (predicted)                                  | 0.94 | SPAC7D4.09c   | (predicted)                               | 0.92 |
| SPAC1F8.06    | cell surface glycoprotein                    | 0.94 | SPBC428.05c   | argininosuccinate synthase (predicted)    | 0.92 |
| SPAC23A1.20   | conserved gene with no initiator methionine  | 0.94 |               | cytoplasmic asparagine-tRNA ligase Nrs1   |      |
|               | cytoplasmic aspartate-tRNA ligase Drs1       |      | SPBC1773.10c  | (predicted)                               | 0.92 |
| SPCC1223.07c  | (predicted)                                  | 0.94 | SPAC521.03    | short chain dehydrogenase (predicted)     | 0.92 |
| SPCC645.04    | Smc5-6 complex non-SMC subunit Nse3          | 0.94 |               | mitochondrial ribosomal protein subunit   |      |
| SPAC18B11.02c | tRNA pseudouridine synthase (predicted)      | 0.94 | SPAC31A2.03   | L11 (predicted)                           | 0.92 |
|               | mitochondrial 3'-tRNA processing             |      |               | mitochondrial respiratory complex         |      |
| SPBC3D6.03c   | endonuclease Trz2                            | 0.94 | SPAC13G7.11   | assembly protein (predicted)              | 0.91 |
|               | 20S proteasome complex subunit beta 2        |      |               | cell surface glycoprotein (predicted)%2C  |      |
| SPAC23D3.07   | (predicted)                                  | 0.94 | SPCC569.01c   | DUF1773 family protein 5                  | 0.91 |
|               | cyclophilin family peptidyl-prolyl cis-trans |      | SPBP35G2.14   | RNA-binding protein                       | 0.91 |
| SPAC57A10.03  | isomerase Cyp1                               | 0.94 | SPCC550.15c   | ribosome biogenesis protein (predicted)   | 0.91 |
| SPBC646.07c   | enoyl reductase (predicted)                  | 0.93 | SPCC330.09    | rRNA processing protein Enp2 (predicted)  | 0.91 |
| SPAC27F1.03c  | ubiquitin C-terminal hydrolase Uch1          | 0.93 |               | DNA-directed RNA polymerase III           |      |
| SPCC1494.08c  | conserved fungal protein                     | 0.93 | SPCC330.13    | complex subunit Rpc37 (predicted)         | 0.91 |
| SPAC56F8.05c  | BAR domain protein (predicted)               | 0.93 |               | CAF assembly factor (CAF-1) complex       |      |
| SPAC15E1.10   | PI31 proteasome inhibitor (predicted)        | 0.93 | SPAC25H1.06   | subunit C%2C Pcf3                         | 0.91 |
| SPAC23D3.09   | SWI/SNF and RSC complex subunit Arp42        | 0.93 |               | serine hydroxymethyltransferase Shm2      |      |
| SPCC1020.06c  | transaldolase (predicted)                    | 0.93 | SPAC18G6.04c  | (predicted)                               | 0.91 |
|               | Sad1-UNC-like protein involved protein       |      | SPBC3B8.03    | saccharopine dehydrogenase (predicted)    | 0.91 |
| SPBC3E7.09    | folding in the ER (predicted)                | 0.93 | SPCC191.09c   | glutathione S-transferase Gst1            | 0.91 |
|               | phosphoribosylaminoimidazole carboxylase     |      | SPAC19G12.10c | vacuolar carboxypeptidase Y               | 0.91 |
| SPCC1322.13   | Ade6                                         | 0.93 | SPBC1711.13   | histidinol dehydrogenase His2 (predicted) | 0.91 |
|               | mitochondrial ribosomal protein subunit L9   |      | SPBC119.11c   | double-strand-specific ribonuclease Pac1  | 0.91 |
| SPAC644.17c   | (predicted)                                  | 0.93 | SPAC25G10.08  | translation initiation factor eIF3b (p84) | 0.91 |
| SPBC4F6.13c   | WD repeat/BOP1NT protein (predicted)         | 0.93 |               | sulfite reductase NADPH flavoprotein      |      |
| SPBC428.19c   | U3 snoRNP protein Utp15 (predicted)          | 0.92 | SPCC584.01c   | subunit (predicted)                       | 0.91 |
| SPBC651.02    | bis(5'-adenosyl)-triphosphatase (predicted)  | 0.92 |               | iron sulfur cluster assembly protein      |      |
| SPAC589.03c   | sequence orphan                              | 0.92 | SPBC18E5.10   | (predicted)                               | 0.91 |

|              |                                                                                    |      |               |                                                                                              |      |
|--------------|------------------------------------------------------------------------------------|------|---------------|----------------------------------------------------------------------------------------------|------|
| SPCC1235.07  | CENP-Q homolog Fta7<br>bromodomain containing protein 1%2C                         | 0.91 | SPCC23B6.01c  | oxysterol binding protein (predicted)                                                        | 0.89 |
| SPBC21D10.10 | Bdc1                                                                               | 0.90 | SPBC1198.08   | dipeptidase Dug1 (predicted)                                                                 | 0.89 |
| SPBC18E5.09c | sequence orphan                                                                    | 0.90 |               | topoisomerase II-associated deadenylation-<br>dependent mRNA-decapping factor<br>(predicted) | 0.89 |
| SPBC36.12c   | SGT1-like protein Git7                                                             | 0.90 | SPBC19G7.10c  | coatomer alpha subunit (predicted)                                                           | 0.89 |
| SPAC19A8.15  | tryptophan synthase (predicted)                                                    | 0.90 | SPBPJ4664.04  | GINS complex subunit Psf1                                                                    | 0.89 |
| SPBC651.06   | sequence orphan                                                                    | 0.90 | SPBP23A10.09  | transcription elongation factor complex<br>subunit Spt4                                      | 0.89 |
| SPBC1711.04  | methylenetetrahydrofolate reductase<br>(predicted)                                 | 0.90 | SPBC21C3.16c  | UBX domain protein Ubx2                                                                      | 0.89 |
|              | ER membrane insertion protein Get4<br>(predicted)                                  | 0.90 | SPAC2C4.15c   | mitochondrial FUN14 family protein                                                           | 0.88 |
| SPCC1672.12c | glyoxylate reductase (predicted)                                                   | 0.89 | SPAC29A4.17c  | sulfate adenylyltransferase                                                                  | 0.88 |
| SPACUNK4.10  | 2-isopropylmalate synthase Leu3                                                    | 0.89 | SPBC27.08c    | secretory pathway protein Sec18<br>(predicted)                                               | 0.88 |
| SPBC3E7.16c  | isocitrate dehydrogenase (NAD+) subunit 1<br>Idh1                                  | 0.89 | SPAC1834.11c  | recombination protein Saw1 (predicted)                                                       | 0.88 |
| SPAC11G7.03  | U3 snoRNP-associated protein Imp3<br>(predicted)                                   | 0.89 | SPBC409.16c   | U3 snoRNP-associated protein Imp4<br>(predicted)                                             | 0.88 |
| SPAC19D5.05c | cytoplasmic lysine-tRNA ligase Krs1<br>(predicted)                                 | 0.89 | SPAC19A8.07c  | inositol polyphosphate kinase (predicted)                                                    | 0.88 |
| SPBC17G9.03c | mitochondrial translation initiation factor<br>(predicted)                         | 0.89 | SPCC970.08    | phenylalanine-tRNA ligase beta subunit<br>Frs1 (predicted)                                   | 0.88 |
| SPBC18E5.13  | tyrosine phosphatase Pyp1                                                          | 0.89 | SPAC23A1.12c  | sequence orphan                                                                              | 0.88 |
| SPAC26F1.10c | F1-ATPase gamma subunit (predicted)                                                | 0.89 | SPCC1322.02   | human COMT catechol O-<br>methyltransferase homolog 1                                        | 0.88 |
| SPBC1734.13  | DNA replication factor C complex subunit<br>Ctf8 (predicted)                       | 0.89 | SPBC119.03    | CTP synthase Cts1 (predicted)                                                                | 0.88 |
| SPAC19D5.11c | F-box protein Pof5                                                                 | 0.89 | SPAC10F6.03c  | 4-nitrophenylphosphatase                                                                     | 0.88 |
| SPAC6F6.02c  | dolichyl-diphospho-oligosaccharide-protein<br>glycosyltransferase Ost1 (predicted) | 0.89 | SPBC15D4.15   | glutamate synthase Glt1 (predicted)                                                          | 0.88 |
| SPAC27F1.07  | mitochondrial carrier with solute carrier<br>repeats (predicted)                   | 0.89 | SPAPB1E7.07   | acetyl-CoA/biotin carboxylase                                                                | 0.88 |
| SPAC823.10c  | TRAPP complex subunit Trs85 (predicted)                                            | 0.89 | SPAC56E4.04c  | ribosomal L24-like protein involved in<br>ribosome biogenesis Rlp24 (predicted)              | 0.88 |
| SPBC1604.19c | homocysteine synthase Met17                                                        | 0.89 | SPAC22E12.13c | cytochrome c1 heme lyase (predicted)                                                         | 0.87 |
| SPBC428.11   |                                                                                    |      | SPAC24C9.02c  | cytoplasmic serine-tRNA ligase Srs1<br>(predicted)                                           | 0.87 |
|              |                                                                                    |      | SPAC29A4.15   |                                                                                              |      |

|               |                                           |      |              |                                              |      |
|---------------|-------------------------------------------|------|--------------|----------------------------------------------|------|
| SPAC23D3.16   | sequence orphan                           | 0.87 |              | glucan endo-1%2C3-alpha-glucosidase          |      |
|               | mitochondrial electron transfer           |      | SPAC14C4.09  | Agn1                                         | 0.86 |
|               | flavoprotein-ubiquinone oxidoreductase    |      | SPAC1610.01  | splicing factor (unnamed)                    | 0.86 |
| SPAC20G8.04c  | (predicted)                               | 0.87 |              | phosphoribosylformylglycinamide              |      |
| SPAC19D5.04   | HECT-type ubiquitin ligase E3 Ptr1        | 0.87 | SPAC6F12.10c | synthase Ade3 (predicted)                    | 0.86 |
|               | mitochondrial outer membrane ATPase       |      | SPAC6G10.12c | transcription factor Ace2                    | 0.86 |
| SPCC24B10.10c | Msp1/Yta4 (predicted)                     | 0.87 | SPAC644.16   | RNA-binding protein (predicted)              | 0.86 |
| SPCC330.05c   | orotidine 5'-phosphate decarboxylase Ura4 | 0.87 |              | mannan endo-1%2C6-alpha-mannosidase          |      |
| SPAC13G7.04c  | membrane anchored protein Mac1            | 0.87 | SPBC1198.06c | (predicted)                                  | 0.86 |
|               | EST1 family nonsense-mediated mRNA        |      | SPAC1486.05  | nucleoporin Nup98 and Nup96                  | 0.86 |
|               | decay (NMD) pathway protein Ebs1          |      | SPBP8B7.11   | ubiquitin protease cofactor Glp1 (predicted) | 0.86 |
| SPBC2F12.03c  | (predicted)                               | 0.87 |              | cyclophilin family peptidyl-prolyl cis-trans |      |
| SPCC18.18c    | fumarate hydratase (predicted)            | 0.87 | SPBP8B7.25   | isomerase Cyp4 (predicted)                   | 0.86 |
|               | oligosaccharyltransferase delta subunit   |      | SPBC146.14c  | coatomer beta subunit (predicted)            | 0.85 |
| SPCC553.06    | Swp1 (predicted)                          | 0.87 |              | initiator methionine tRNA 2'-O-ribosyl       |      |
| SPBC16E9.16c  | Lsd90 protein                             | 0.87 | SPAC3F10.06c | phosphate transferase (predicted)            | 0.85 |
| SPBC1711.16   | WD repeat protein (predicted)             | 0.87 | SPAC19D5.06c | Dhp1p-interacting protein Din1               | 0.85 |
| SPBC21B10.03c | ataxin-2 homolog                          | 0.87 | SPAC17H9.03c | RAD51D-like protein 1                        | 0.85 |
|               | ribosomal export complex protein          |      |              | COP9/signalosome complex subunit Csn3        |      |
| SPBC23E6.05   | Arx1%2C peptidase family (predicted)      | 0.87 | SPAC222.16c  | (predicted)                                  | 0.85 |
|               | mitochondrial inner membrane translocase  |      | SPBC2A9.09   | phosducin family protein (predicted)         | 0.85 |
| SPAC9G1.04    | Oxa101                                    | 0.86 |              | Cdc48-Ufd1-Npl4 complex subunit Ufd1         |      |
| SPCC162.07    | epsin                                     | 0.86 | SPBC16A3.09c | (predicted)                                  | 0.85 |
| SPBC651.01c   | GTP binding protein Nog1 (predicted)      | 0.86 | SPCC1322.15  | 60S ribosomal protein L34                    | 0.85 |
| SPCC1393.12   | sequence orphan                           | 0.86 | SPAPB8E5.02c | 19S proteasome regulatory subunit Rpn502     | 0.85 |
|               | mitochondrial ribosomal protein subunit   |      |              | protein phosphatase regulatory subunit       |      |
| SPAC31A2.08   | L23 (predicted)                           | 0.86 | SPAP8A3.09c  | Paa1                                         | 0.85 |
|               | AP-3 adaptor complex subunit Apm3         |      |              | lectin family glycoprotein receptor          |      |
| SPBC651.11c   | (predicted)                               | 0.86 | SPCC126.08c  | (predicted)                                  | 0.85 |
| SPAC4D7.05    | translation initiation factor eIF3i       | 0.86 | SPBC16E9.12c | poly(A) binding protein Pab2                 | 0.85 |
|               | ubiquinol-cytochrome-c reductase complex  |      |              | mitochondrial iron ion transporter           |      |
| SPAC1782.07   | subunit 7                                 | 0.86 | SPAC4G8.08   | (predicted)                                  | 0.85 |



|               |                                                                    |      |               |                                                                                    |      |
|---------------|--------------------------------------------------------------------|------|---------------|------------------------------------------------------------------------------------|------|
| SPCP20C8.02c  | S. pombe specific UPF0321 family protein 1                         | 0.85 | SPBC2G5.03    | cytosolic thiouridylase subunit Ctu1                                               | 0.83 |
| SPBP35G2.07   | acetolactate synthase catalytic subunit                            | 0.84 | SPCC188.14    | sequence orphan                                                                    | 0.83 |
| SPAC24C9.06c  | aconitate hydratase (predicted)                                    | 0.84 | SPAC1002.17c  | uracil phosphoribosyltransferase (predicted)                                       | 0.83 |
| SPCC188.02    | protein phosphatase regulatory subunit Par1                        | 0.84 | SPAC1782.04   | mitochondrial mRNA processing protein Cox24/Pet20 (predicted)                      | 0.83 |
| SPAC8C9.14    | transcription factor Prr1                                          | 0.84 | SPAC9E9.15    | CIA30 protein (predicted)                                                          | 0.83 |
| SPBC27B12.10c | mitochondrial TOM complex subunit Tom7 (predicted)                 | 0.84 | SPBC947.03c   | NatC N-acetyltransferase non catalytic Sm-like domain subunit Naa38 (predicted)    | 0.83 |
| SPAC57A7.12   | heat shock protein Pdr13 (predicted)                               | 0.84 | SPAC22F8.08   | COPII cargo receptor Sec24/Sfb2 subunit                                            | 0.83 |
| SPBC146.07    | U2AF large subunit (U2AF-59)                                       | 0.84 | SPAC12G12.01c | ubiquitin-protein ligase E3                                                        | 0.83 |
| SPBC14F5.09c  | adenylosuccinate lyase Ade8                                        | 0.84 | SPAC19G12.15c | trehalose-6-phosphate phosphatase Tpp1                                             | 0.83 |
| SPCC191.02c   | acetyl-CoA ligase (predicted)                                      | 0.84 | SPBC29A10.01  | NADPH-cytochrome p450 reductase                                                    | 0.83 |
| SPAC343.09    | UBX domain protein Ubx3%2C Cdc48 cofactor                          | 0.84 | SPBC1773.05c  | hexitol dehydrogenase (predicted)                                                  | 0.82 |
| SPBC12C2.05c  | diacylglycerol binding protein Bzz1 (predicted)                    | 0.84 | SPAC22E12.09c | kexin                                                                              | 0.82 |
| SPAC26A3.01   | aspartic protease Sxa1                                             | 0.84 | SPCC1840.10   | U6 snRNP-associated protein Lsm8 (predicted)                                       | 0.82 |
| SPAC227.17c   | conserved protein                                                  | 0.84 | SPAC23D3.08   | U1 snRNP-associated protein Usp108                                                 | 0.82 |
| SPAC8C9.15c   | translation initiation factor eIF2B epsilon subunit (predicted)    | 0.84 | SPAC56F8.10   | methylenetetrahydrofolate reductase Met9                                           | 0.82 |
| SPCC1183.07   | U3 snoRNP-associated protein Rrp5 (predicted)                      | 0.83 | SPBC11B10.02c | histidinol-phosphate aminotransferase imidazole acetol phosphate transaminase His3 | 0.82 |
| SPAC1782.08c  | exonuclease Rex3 (predicted)                                       | 0.83 | SPCC1450.03   | ribonucleoprotein (RNP) complex (predicted)                                        | 0.82 |
| SPCC1450.02   | Swr1 complex bromodomain subunit Brf1                              | 0.83 | SPAC806.07    | nucleoside diphosphate kinase Ndk1                                                 | 0.82 |
| SPAC4A8.04    | vacuolar serine protease Isp6                                      | 0.83 | SPAC1556.03   | serine/threonine protein phosphatase Azr1                                          | 0.82 |
| SPAC30C2.05   | cornichon family protein Erv14 (predicted)                         | 0.83 | SPCC364.07    | D-3 phosphoglycerate dehydrogenase (predicted)                                     | 0.82 |
| SPCC338.14    | adenosine kinase (predicted)                                       | 0.83 | SPBC36.10     | mitochondrial intermembrane space protein sorting protein (predicted)              | 0.82 |
| SPAC4F10.10c  | mannosyltransferase complex subunit%2C Anp family Mnn9 (predicted) | 0.83 | SPBC800.12c   | ubiquitin family protein (predicted)                                               | 0.82 |
| SPBC106.06    | chaperonin-containing T-complex delta subunit Cct4                 | 0.83 | SPAPYUG7.05   | delta-1-pyrroline-5-carboxylate reductase (predicted)                              | 0.82 |
| SPBC29A3.18   | cytochrome c1 Cyt1 (predicted)                                     | 0.83 |               |                                                                                    |      |

|               |                                           |      |              |                                            |      |
|---------------|-------------------------------------------|------|--------------|--------------------------------------------|------|
| SPAC23A1.07   | ubiquitin-protein ligase E3 (predicted)   | 0.82 |              | AP-1 adaptor complex subunit beta subunit  |      |
| SPAC8C9.05    | D-Tyr-tRNA deacylase (predicted)          | 0.82 | SPBC947.02   | Apl2                                       | 0.81 |
| SPAC22H10.13  | metallothionein Zym1                      | 0.82 | SPBC776.09   | ATP-dependent RNA helicase Ste13           | 0.81 |
| SPAPYUG7.03c  | medial ring protein Mid2                  | 0.82 | SPAC1F8.05   | sequence orphan                            | 0.81 |
| SPCC1919.09   | translation initiation factor eIF6        | 0.82 | SPCC1682.15  | PX/PXA domain protein                      | 0.81 |
|               | transcription elongation factor%2C Elf1   |      | SPBC4C3.07   | translation initiation factor eIF3f        | 0.80 |
| SPAC1B3.02c   | family (predicted)                        | 0.82 |              | Ras1 guanyl-nucleotide exchange factor     |      |
|               | proteasome maturation factor Ump1         |      | SPBC336.03   | Efc25                                      | 0.80 |
| SPCC14G10.03c | (predicted)                               | 0.82 | SPCC16C4.10  | 6-phosphogluconolactonase (predicted)      | 0.80 |
|               | delta-1-pyrroline-5-carboxylate           |      | SPAPYUG7.06  | PPPDE peptidase family (predicted)         | 0.80 |
| SPBC24C6.04   | dehydrogenase (predicted)                 | 0.82 | SPAC12G12.02 | rRNA processing protein Efg1 (predicted)   | 0.80 |
|               | Man5GlcNac2-PP-Dol translocation protein  |      |              | ubiquitin protein ligase E3 component      |      |
| SPBC887.19    | Rft1 (predicted)                          | 0.81 | SPBC4.05     | human N-recognin 7 homolog Mlo2            | 0.80 |
| SPBC18E5.11c  | enhancer of mRNA decapping Edc3           | 0.81 |              | COPII vesicle coat component Erp5/Erp6     |      |
| SPAPB8E5.07c  | rRNA processing protein Rrp12 (predicted) | 0.81 | SPBC16E9.09c | (predicted)                                | 0.80 |
|               | mitochondrial ACN9 family protein         |      |              | ER protein translocation subcomplex        |      |
| SPBP23A10.03c | (predicted)                               | 0.81 | SPAC2F3.02   | subunit Sec72 (predicted)                  | 0.80 |
| SPCC1259.16   | sequence orphan                           | 0.81 |              | dihydrofolate reductase/ serine hydrolase  |      |
|               | leucine carboxyl methyltransferase Ppm1   |      | SPCC1223.08c | family fusion protein Dfr1                 | 0.80 |
| SPBP8B7.08c   | (predicted)                               | 0.81 |              | transcription factor TFIIA complex large   |      |
| SPAC1F7.07c   | iron permease Fip1                        | 0.81 | SPBC28F2.09  | subunit Toa1 (predicted)                   | 0.80 |
| SPBC887.08    | sequence orphan                           | 0.81 |              | chaperonin-containing T-complex theta      |      |
| SPBC146.12    | monooxygenase Coq6 (predicted)            | 0.81 | SPBC337.05c  | subunit Cct8                               | 0.80 |
|               | pyruvate dehydrogenase protein x          |      | SPAC22A12.16 | ATP-citrate synthase subunit 2 (predicted) | 0.80 |
| SPCC1259.09c  | component%2C Pdx1 (predicted)             | 0.81 | SPAC9E9.10c  | CENP-B homolog Cbh1                        | 0.79 |
| SPBC106.12c   | THO complex subunit (predicted)           | 0.81 |              | mitochondrial ATP-dependent RNA            |      |
|               | signal recognition particle subunit Srp21 |      | SPBC691.04   | helicase Mss116 (predicted)                | 0.79 |
| SPAC17H9.07   | (predicted)                               | 0.81 |              | mitochondrial and cytoplasmic glycine-     |      |
| SPCC18B5.11c  | replication checkpoint kinase Cds1        | 0.81 | SPAC3F10.03  | tRNA ligase Grs1 (predicted)               | 0.79 |
|               | rRNA (pseudouridine) methyltransferase    |      | SPBC16H5.02  | 6-phosphofructokinase (predicted)          | 0.79 |
| SPAC18G6.07c  | Mra1                                      | 0.81 | SPAC222.12c  | F1-ATPase beta subunit Atp2                | 0.79 |
| SPBC646.14c   | origin recognition complex subunit Orc5   | 0.81 | SPAC11G7.02  | HECT-type ubiquitin-protein ligase E3      | 0.79 |

|              |                                             |      |               |                                             |      |
|--------------|---------------------------------------------|------|---------------|---------------------------------------------|------|
|              | Pub1                                        |      | SPAC23D3.03c  | GTPase activating protein (predicted)       | 0.78 |
| SPAC31G5.14  | glycine decarboxylase T subunit (predicted) | 0.79 | SPCPJ732.03   | sequence orphan                             | 0.78 |
| SPAC57A10.14 | SAGA complex subunit Sgf11                  | 0.79 |               | zinc finger protein%2C human ZNF593         |      |
|              | ribosome biogenesis protein Tsr1            |      | SPAC19B12.11c | ortholog                                    | 0.78 |
| SPAC23H4.15  | (predicted)                                 | 0.79 | SPBC365.14c   | UDP-glucose 4-epimerase Uge1                | 0.78 |
| SPAC56F8.07  | conserved eukaryotic ER membrane protein    | 0.79 | SPAC26A3.04   | 60S ribosomal protein L20 (predicted)       | 0.78 |
| SPAC57A10.06 | sequence orphan                             | 0.79 | SPAC57A7.10c  | coatomer gamma subunit Sec21 (predicted)    | 0.78 |
|              | cytoskeletal protein binding protein Sla1   |      | SPBC887.10    | response regulator Mcs4                     | 0.78 |
| SPAC16E8.01  | family%2C Shd1 (predicted)                  | 0.79 | SPBC1604.21c  | ubiquitin activating enzyme E1              | 0.78 |
|              | NADPH quinone oxidoreductase/ARE-           |      | SPAC977.16c   | dihydroxyacetone kinase Dak2                | 0.78 |
| SPCC1442.16c | binding protein (predicted)                 | 0.79 | SPAC1B3.06c   | UbiE family methyltransferase (predicted)   | 0.77 |
| SPAC19G12.04 | ureidoglycolate hydrolase (predicted)       | 0.79 |               | ribosome biogenesis protein Sgt1            |      |
|              | DUF1752 family protein%2C involved in       |      | SPAC25H1.08c  | (predicted)                                 | 0.77 |
| SPAC1420.01c | regulation of transcription (predicted)     | 0.79 | SPAC23A1.17   | WIP family cytoskeletal protein (predicted) | 0.77 |
|              | alditol NADP+ 1-oxidoreductase activity     |      | SPBC36B7.06c  | sequence orphan                             | 0.77 |
| SPBC8E4.04   | (predicted)                                 | 0.79 | SPBC3E7.14    | Sm snRNP core protein Smf1                  | 0.77 |
|              | CDK regulator%2C involved in ribosome       |      |               | 20S proteasome complex subunit alpha 1      |      |
| SPCC613.08   | export (predicted)                          | 0.79 | SPBC646.16    | (predicted)                                 | 0.77 |
|              | Sid2-Mob1 kinase complex regulatory         |      |               | ubiquinol-cytochrome-c reductase complex    |      |
| SPBC428.13c  | subunit Mob1                                | 0.79 | SPCC737.02c   | subunit 6 (predicted)                       | 0.77 |
| SPAC1002.01  | conserved fungal protein                    | 0.78 |               | aldo/keto reductase%2C unknown              |      |
|              | vacuolar transporter chaperone (VTC)        |      | SPBC215.11c   | biological role                             | 0.77 |
| SPCC1322.14c | complex subunit (predicted)                 | 0.78 |               | TATA-binding protein associated factor      |      |
|              | 20S proteasome complex subunit alpha        |      | SPBC1826.01c  | Mot1 (predicted)                            | 0.77 |
| SPCC1442.06  | 2%2C Pre8 (predicted)                       | 0.78 | SPAC4A8.16c   | translation initiation factor eIF3c         | 0.77 |
|              | RNA polymerase I upstream activation        |      | SPBC17D11.06  | DNA primase large subunit Spp2              | 0.77 |
| SPAC22E12.08 | factor complex subunit Rrn10                | 0.78 | SPAC17C9.03   | translation initiation factor eIF4G         | 0.77 |
| SPAC637.07   | translation initiation factor eIF3d Moe1    | 0.78 | SPAC23G3.06   | U3 snoRNP protein Nop58 (predicted)         | 0.77 |
|              | FKBP-type peptidyl-prolyl cis-trans         |      | SPAC1834.10c  | sequence orphan                             | 0.77 |
| SPBC1347.02  | isomerase (predicted)                       | 0.78 | SPAC11D3.09   | agmatinase (predicted)                      | 0.77 |
| SPCC306.09c  | adenylyl cyclase-associated protein Cap1    | 0.78 |               | RNAPII degradation factor Def1              |      |
| SPBC2D10.03c | DUF866 domain protein                       | 0.78 | SPBC354.10    | (predicted)                                 | 0.77 |

|               |                                            |      |               |                                            |      |
|---------------|--------------------------------------------|------|---------------|--------------------------------------------|------|
| SPBC1604.08c  | importin alpha                             | 0.77 |               | transcription factor TFIID complex subunit |      |
|               | ATP-dependent RNA helicase Dbp3            |      | SPAC23G3.09   | Taf4 (predicted)                           | 0.75 |
| SPBC17D1.06   | (predicted)                                | 0.77 |               | actin cortical patch component Lsb4        |      |
| SPAC5H10.01   | DUF1445 family protein                     | 0.76 | SPAPJ696.02   | (predicted)                                | 0.75 |
|               | SWIM domain containing-Srs2 interacting    |      |               | U3 snoRNP-associated protein Utp11         |      |
| SPBC11B10.06  | protein 1                                  | 0.76 | SPAC18G6.06   | (predicted)                                | 0.75 |
| SPAC4A8.06c   | esterase/lipase (predicted)                | 0.76 |               | ER protein translocation subcomplex        |      |
| SPBC2G2.03c   | translocon beta subunit Sbh1 (predicted)   | 0.76 | SPBC36B7.03   | subunit Sec63 (predicted)                  | 0.75 |
| SPAC3A11.07   | NADH dehydrogenase (predicted)             | 0.76 |               | Golgi transport complex subunit Cog2       |      |
|               | signal recognition particle subunit        |      | SPBC36.08c    | (predicted)                                | 0.75 |
| SPCC1682.05c  | (predicted)                                | 0.76 |               | pyridoxamine 5'-phosphate oxidase          |      |
| SPAC2C4.10c   | SIP/FAR complex subunit Csc4               | 0.76 | SPAC1093.02   | (predicted)                                | 0.75 |
| SPAC4A8.13c   | 20S proteasome complex subunit beta 5      | 0.76 | SPAC29A4.16   | halotolerance protein 4                    | 0.75 |
|               | U3 snoRNP-associated protein Utp10         |      |               | SNARE associated Golgi protein             |      |
| SPBC23E6.04c  | (predicted)                                | 0.76 | SPBC1711.09c  | (predicted)                                | 0.75 |
|               | synaptotagmin family C2 domain             |      |               | nuclear exosome-associated RNA binding     |      |
| SPAPYUK71.03c | protein Syn1                               | 0.76 | SPACUNK4.11c  | protein Mpp6                               | 0.75 |
| SPAC821.08c   | sleepy homolog Slp1                        | 0.76 | SPAC9G1.02    | MAP kinase kinase kinase Wis4              | 0.75 |
|               | inositol 1,3,4,5-tetrakisphosphate         |      | SPBC1105.17   | centromere-specific histone H3 CENP-A      | 0.75 |
| SPCC4B3.10c   | kinase                                     | 0.76 | SPBPB2B2.09c  | 2-dehydropantoate 2-reductase (predicted)  | 0.75 |
| SPCC1884.01   | sequence orphan                            | 0.76 |               | imidazoleglycerol-phosphate synthase       |      |
| SPAC607.05    | 19S proteasome regulatory subunit Rpn9     | 0.76 | SPBC418.01c   | (predicted)                                | 0.75 |
|               | 3-hydroxy-3-methylglutaryl-CoA reductase   |      |               | mitochondrial ribosomal protein subunit S2 |      |
| SPCC162.09c   | Hmg1                                       | 0.76 | SPAC24C9.10c  | (predicted)                                | 0.75 |
| SPBC1734.05c  | DNAJ protein Spf31 (predicted)             | 0.76 | SPCC1223.14   | chorismate synthase (predicted)            | 0.75 |
| SPBC660.13c   | DNA replication factor A subunit Ssb1      | 0.76 | SPAC1002.09c  | dihydrolipoamide dehydrogenase Dld1        | 0.75 |
|               | serine/threonine protein kinase Ksp1       |      |               | serine palmitoyltransferase Lcb2           |      |
| SPBC16E9.13   | (predicted)                                | 0.75 | SPAC21E11.08  | (predicted)                                | 0.74 |
|               | mitochondrial conserved eukaryotic protein |      | SPAC31A2.10   | Ran GTPase binding protein (predicted)     | 0.74 |
| SPCP31B10.02  | (predicted)                                | 0.75 | SPBC1604.10   | mediator complex subunit Srb7              | 0.74 |
| SPAC186.03    | L-asparaginase (predicted)                 | 0.75 | SPBC56F2.11   | homoserine O-acetyltransferase Met6        | 0.74 |
| SPBC16H5.10c  | ATP-dependent RNA helicase Prp43           | 0.75 | SPCP31B10.03c | mediator complex subunit Med31             | 0.74 |

|               |                                                                                           |      |               |                                                                                   |      |
|---------------|-------------------------------------------------------------------------------------------|------|---------------|-----------------------------------------------------------------------------------|------|
| SPBC1711.05   | nucleocytoplasmic transport chaperone<br>Srp40 (predicted)                                | 0.74 | SPAC22E12.11c | histone lysine methyltransferase Set3                                             | 0.73 |
| SPAC9E9.06c   | threonine synthase (predicted)                                                            | 0.74 | SPAC57A10.12c | dihydroorotate dehydrogenase Ura3                                                 | 0.73 |
| SPBC577.10    | 20S proteasome complex subunit beta 7<br>(predicted)                                      | 0.74 | SPAC1687.09   | ENTH/VHS domain protein (predicted)                                               | 0.73 |
| SPAC2F7.14c   | exosome subunit Rrp4                                                                      | 0.74 | SPBC215.08c   | arginine specific carbamoyl-phosphate<br>synthase Arg4 (predicted)                | 0.73 |
| SPBC3B8.05    | diphthamide biosynthesis protein Dph1<br>(predicted)                                      | 0.74 | SPBC1198.03c  | conserved fungal protein                                                          | 0.73 |
| SPAC25G10.05c | ATP phosphoribosyltransferase                                                             | 0.74 | SPCC1442.05c  | mitochondrial protein                                                             | 0.73 |
| SPBC12C2.09c  | Haemolysin-III family protein (predicted)                                                 | 0.74 | SPBC29A10.12  | DUF1014 family protein%2C HMG-box<br>clan member                                  | 0.73 |
| SPAC694.02    | DEAD/DEAH box helicase                                                                    | 0.74 | SPAC2F3.03c   | DNA-directed RNA polymerase I complex<br>subunit Rpa49 (predicted)                | 0.72 |
| SPBC1105.02c  | homocitrate synthase                                                                      | 0.74 | SPBC660.17c   | sequence orphan                                                                   | 0.72 |
| SPBC651.03c   | GTPase activating protein Gyp10                                                           | 0.74 | SPCC285.17    | RNA polymerase I upstream activation<br>factor complex subunit Spp27              | 0.72 |
| SPAC4A8.12c   | protein phosphatase regulatory subunit<br>Sds22                                           | 0.74 | SPCC191.05c   | nucleoside 2-deoxyribosyltransferase<br>(predicted)                               | 0.72 |
| SPCC1840.11   | exosome subunit Csl4                                                                      | 0.74 | SPCC1827.05c  | nucleolar RNA-binding protein NIFK<br>(predicted)                                 | 0.72 |
| SPAC16.02c    | mRNA export factor Srp2                                                                   | 0.73 | SPAC6G9.13c   | bouquet formation protein Bqt1                                                    | 0.72 |
| SPBC1A4.08c   | chaperonin-containing T-complex gamma<br>subunit Cct3                                     | 0.73 | SPBC1861.04c  | RNA-binding protein Prp24 (predicted)                                             | 0.72 |
| SPAC1635.01   | mitochondrial outer membrane voltage-<br>dependent anion-selective channel<br>(predicted) | 0.73 | SPCC63.06     | human WDR89 family WD repeat protein<br>mitochondrial single-stranded DNA binding | 0.72 |
| SPCC16A11.06c | pig-B (predicted)                                                                         | 0.73 | SPAC2F3.04c   | protein Rim1                                                                      | 0.72 |
| SPBC21D10.11c | mitochondrial cysteine desulfurase Nfs1<br>(predicted)                                    | 0.73 | SPBC1A4.01    | anaphase-promoting complex subunit<br>Apc10                                       | 0.72 |
| SPAC977.15    | dienelactone hydrolase family                                                             | 0.73 | SPCC70.09c    | conserved fungal protein                                                          | 0.72 |
| SPAC23H4.11c  | centromere localized protein Cnl2                                                         | 0.73 | SPBC1683.02   | adenine/adenosine deaminase family<br>(predicted)                                 | 0.72 |
| SPBC713.03    | mitochondrial D-lactate<br>dehydrogenase%2C cytochrome (predicted)                        | 0.73 | SPAC13G7.06   | phosphoadenosine phosphosulfate<br>reductase                                      | 0.72 |
| SPAC3H1.14    | cytoplasmic vesicle protein%2C Vid24<br>family (predicted)                                | 0.73 | SPBC146.01    | mediator complex subunit Med15                                                    | 0.72 |
| SPAC20G4.07c  | C-24(28) sterol reductase Sts1                                                            | 0.73 | SPBC17G9.09   | translation initiation factor eIF2 gamma                                          | 0.72 |

|               |                                             |      |               |                                              |      |
|---------------|---------------------------------------------|------|---------------|----------------------------------------------|------|
|               | subunit (predicted)                         |      | SPAC2C4.09    | DUF1640 family protein                       | 0.71 |
| SPAC3C7.11c   | calnexin Cnx1                               | 0.72 | SPCC320.08    | membrane transporter (predicted)             | 0.71 |
|               | P-type ATPase%2C calcium transporting       |      | SPBC12D12.02c | DNA polymerase delta subunit Cdm1            | 0.71 |
| SPBC31E1.02c  | Pmr1                                        | 0.72 |               | ATP-dependent RNA helicase%2C                |      |
|               | S. pombe specific UPF0321 family protein    |      | SPAC6F12.16c  | TRAMP complex subunit Mtr4                   | 0.71 |
| SPCC569.02c   | 2                                           | 0.71 | SPCC645.12c   | sequence orphan                              | 0.71 |
| SPBC16E9.05   | sterol 24-C-methyltransferase Erg6          | 0.71 | SPAC1782.06c  | prohibitin Phb1 (predicted)                  | 0.71 |
| SPAC22H10.12c | GDP dissociation inhibitor Gdi1 (predicted) | 0.71 |               | aldo/keto reductase%2C unknown               |      |
|               | 20S proteasome complex subunit beta         |      | SPAC977.14c   | biological role                              | 0.70 |
| SPCC63.12c    | 3%2C Pup3 (predicted)                       | 0.71 | SPAC767.01c   | dynamamin family protein Vps1                | 0.70 |
| SPCC1795.03   | UDP-galactose transporter Gms1              | 0.71 |               | cytoplasmic phenylalanine-tRNA ligase        |      |
| SPBC21C3.15c  | aldehyde dehydrogenase (predicted)          | 0.71 | SPAC3G9.06    | alpha subunit Frs2 (predicted)               | 0.70 |
|               | pentafunctional aromatic polypeptide Aro1   |      | SPCC4F11.03c  | sequence orphan                              | 0.70 |
| SPAC1834.02   | (predicted)                                 | 0.71 | SPCC1682.04   | centrin                                      | 0.70 |
|               | 2-oxoglutarate dehydrogenase (lipoamide)    |      |               | cell wall biosynthesis/ cell cycle regulator |      |
|               | (e1 component of oxoglutarate               |      | SPBC30D10.17c | (predicted)                                  | 0.70 |
| SPBC3H7.03c   | dehydrogenase complex) (predicted)          | 0.71 | SPBC2D10.12   | Rad23 homolog Rhp23                          | 0.70 |
| SPCC1281.01   | alpha-1%2C4-glucan synthase Ags1            | 0.71 | SPCC1442.04c  | meiotic recombination protein (predicted)    | 0.70 |
| SPBC14F5.08   | mediator complex subunit Med7               | 0.71 | SPAC27D7.07c  | Sm snRNP core protein Smd1                   | 0.70 |
| SPBC337.12    | human ZC3H3 homolog                         | 0.71 | SPCC1672.10   | kinetochore protein Mis16                    | 0.70 |
| SPAC1F5.02    | protein disulfide isomerase (predicted)     | 0.71 | SPAC589.06c   | pho88 family protein (predicted)             | 0.70 |
| SPBC14F5.01   | sequence orphan                             | 0.71 | SPBP4G3.03    | PI31 proteasome regulator related            | 0.70 |
| SPAC23C11.11  | serine/threonine protein kinase Cka1        | 0.71 |               | pyruvate dehydrogenase e1 component beta     |      |
|               | 20S proteasome complex subunit alpha 6      |      | SPBC30D10.13c | subunit Pdb1                                 | 0.70 |
| SPAC6G10.04c  | subunit Pre5 (predicted)                    | 0.71 | SPAC19G12.03  | chitin deacetylase Cda1                      | 0.70 |
|               | acetolactate synthase regulatory unit       |      |               | shuttle craft like transcriptional regulator |      |
| SPBC14C8.04   | (predicted)                                 | 0.71 | SPCC18.03     | (predicted)                                  | 0.70 |
|               | nuclear distribution protein NUDC           |      |               | U3-containing 90S preribosome complex        |      |
| SPBC19F8.02   | homolog                                     | 0.71 | SPBC23G7.07c  | subunit Cms1 (predicted)                     | 0.70 |
|               | transcription factor TFIIE beta subunit%2C  |      |               | High-mobility group non-histone chromatin    |      |
| SPCC1672.08c  | TFIIEB%2C Tfa2                              | 0.71 | SPAC57A10.09c | protein (predicted)                          | 0.70 |
| SPAC20G8.09c  | ribosome biogenesis ATPase (predicted)      | 0.71 | SPAC1F7.10    | hydantoin racemase family (predicted)        | 0.70 |

|              |                                                                      |      |               |                                                               |      |
|--------------|----------------------------------------------------------------------|------|---------------|---------------------------------------------------------------|------|
| SPAC1142.03c | Swi5 complex subunit Swi2                                            | 0.70 | SPCC1281.02c  | splicing factor Spf30 (predicted)                             | 0.69 |
| SPCC645.07   | RhoGEF for Rho1%2C Rgf1                                              | 0.70 |               | CCR4-Not complex CAF1 family                                  |      |
| SPAC57A7.15c | sequence orphan                                                      | 0.70 | SPCC18.06c    | ribonuclease subunit Caf1                                     | 0.69 |
| SPBC146.13c  | myosin type I                                                        | 0.70 | SPCC330.20    | conserved fungal protein                                      | 0.69 |
| SPAC607.07c  | sequence orphan                                                      | 0.70 | SPCC645.08c   | RNA-binding protein Snd1                                      | 0.69 |
| SPBC19F5.04  | aspartate kinase (predicted)                                         | 0.70 | SPAC2G11.15c  | rRNA methyltransferase Tgs1 (predicted)                       | 0.69 |
| SPAC4F10.13c | GYF domain protein                                                   | 0.70 | SPBC1604.03c  | conserved fungal protein                                      | 0.69 |
| SPAC6G10.08  | isocitrate dehydrogenase Idp1 (predicted)                            | 0.70 | SPCC1827.03c  | acetyl-CoA ligase (predicted)                                 | 0.69 |
|              | cytoplasmic threonine-tRNA ligase Trs1                               |      |               | S-adenosylmethionine transporter                              |      |
| SPBC25H2.02  | (predicted)                                                          | 0.70 | SPAC12B10.09  | (predicted)                                                   | 0.69 |
|              | carbamoyl-phosphate synthase (glutamine hydrolyzing)%2C aspartate    |      | SPAC14C4.06c  | poly(A) binding protein Nab2 (predicted)                      | 0.69 |
|              | carbamoyltransferase Ura1                                            | 0.69 | SPBC16E9.06c  | BolA domain UV induced protein Uvi31                          | 0.69 |
| SPAC22G7.06c | porphobilinogen synthase Hem2 (predicted)                            | 0.69 | SPCC1393.13   | DUF89 family protein                                          | 0.69 |
| SPAC1805.06c | cytoplasmic ATP-dependent RNA helicase Dbp5 (predicted)              | 0.69 | SPAC13C5.04   | amidotransferase (predicted)                                  | 0.68 |
|              | mitochondria microtubule binder Mmb1                                 | 0.69 |               | RNA polymerase II associated Paf1 complex (predicted)         | 0.68 |
| SPBC12C2.06  | serine/threonine protein kinase%2C meiotic Mde3                      | 0.69 | SPAC664.03    | RNA polymerase III transcription factor TFIIA                 | 0.68 |
| SPBC25B2.07c | GTP binding protein Bms1 (predicted)                                 | 0.69 |               | mannosyltransferase complex subunit%2C Anp family (predicted) | 0.68 |
|              | C-22 sterol desaturase Erg5                                          | 0.69 | SPAC144.09c   | ESCRT III complex subunit Did2                                |      |
| SPBC8D2.19   | AAA family ATPase Rvb1                                               | 0.69 |               | (predicted)                                                   | 0.68 |
| SPBC31E1.06  | pseudouridylate synthase Cbf5 (predicted)                            | 0.69 | SPBC13G1.12   | alpha-1%2C2-galactosyltransferase Gma12                       | 0.68 |
| SPAC19A8.04  | phosphoribosylamine-glycine ligase/phosphoribosylformylglycinamidine | 0.69 | SPCC736.04c   | ornithine transaminase Car2                                   | 0.68 |
| SPAPB8E5.09  | cyclo-ligase                                                         | 0.69 | SPBC21C3.08c  | hydrolase (predicted)                                         | 0.68 |
| SPAC29A4.04c | 3-isopropylmalate dehydrogenase Leu1                                 | 0.69 | SPBC17G9.12c  | sequence orphan                                               | 0.68 |
|              | glutaredoxin Grx2                                                    | 0.69 | SPAC30D11.02c | signal recognition particle subunit Srp14                     | 0.68 |
|              | ENTH/VHS domain protein Ent3                                         | 0.69 | SPAC19B12.09  | nucleosome assembly protein Nap2                              |      |
| SPCC794.11c  | (predicted)                                                          | 0.69 |               | (predicted)                                                   | 0.68 |
|              | transcription factor%2C zf-fungal binuclear cluster type             | 0.69 | SPBC2D10.11c  | dubious                                                       | 0.68 |
| SPAC1399.05c |                                                                      |      | SPBC13G1.16   | sequence orphan                                               | 0.68 |
|              |                                                                      |      | SPBC83.19c    | mediator complex subunit Pmc4                                 | 0.68 |
|              |                                                                      |      | SPBC1105.06   |                                                               |      |

|              |                                                                                                 |      |               |                                                                              |      |
|--------------|-------------------------------------------------------------------------------------------------|------|---------------|------------------------------------------------------------------------------|------|
| SPAPB21F2.03 | ribosome biogenesis protein Slx9<br>(predicted)                                                 | 0.68 | SPBC800.14c   | DUF1772 family protein                                                       | 0.67 |
|              | rRNA (guanine) methyltransferase                                                                |      | SPAC2C4.04c   | conserved eukaryotic protein                                                 | 0.67 |
| SPAC26A3.06  | (predicted)                                                                                     | 0.68 | SPBC16A3.04   | mitochondrial ribosomal protein subunit<br>Rsm25 (predicted)                 | 0.67 |
| SPAC31G5.04  | homoisocitrate dehydrogenase Lys12                                                              | 0.68 |               | glucan glucosidase Exg2%2C unknown<br>specificity                            | 0.67 |
| SPAC23A1.02c | phosphoprotein phosphatase (predicted)                                                          | 0.68 | SPAC12B10.11  | RNA polymerase II complex subunit Rpb2                                       | 0.67 |
|              | TIP41-like type 2a phosphatase regulator                                                        |      | SPAC23G3.01   | 20S proteasome complex subunit beta 4<br>(predicted)                         | 0.67 |
| SPCC4B3.16   | Tip41                                                                                           | 0.68 |               | ribonuclease H2 complex subunit<br>(predicted)                               | 0.67 |
| SPBC14C8.14c | DNA polymerase phi                                                                              | 0.68 | SPAC31A2.04c  | MVB sorting pathway protein (predicted)                                      | 0.67 |
| SPCC338.05c  | ubiquitin conjugating enzyme Mms2                                                               | 0.68 |               | 5-aminolevulinic synthase (predicted)                                        | 0.67 |
|              | mitochondrial inner membrane i-AAA                                                              |      | SPAC12B10.15c | COPII cargo receptor subunit Sec23a<br>(predicted)                           | 0.67 |
| SPCC965.04c  | protease complex subunit Yme1 (predicted)                                                       | 0.68 | SPCC1442.17c  | fatty acid synthase beta subunit Fas1                                        | 0.67 |
| SPAC31G5.18c | silencing defective protein Sde2                                                                | 0.68 | SPAC2F3.09    | transcription factor TFIID complex subunit<br>Taf3 (predicted)               | 0.67 |
| SPAC23D3.17  | conserved fungal protein                                                                        | 0.68 |               | 19S proteasome regulatory subunit Rpn13a                                     | 0.67 |
| SPAC17H9.04c | RNA-binding protein                                                                             | 0.68 | SPCC31H12.07  | DUF3210 family protein                                                       | 0.67 |
|              | mitochondrial morphology protein<br>(predicted)                                                 | 0.68 | SPAC926.09c   | sir antagonist                                                               | 0.67 |
| SPCC4B3.03c  | human AMMECR1 homolog                                                                           | 0.68 |               | signal peptidase subunit Spc2 (predicted)                                    | 0.67 |
| SPAC688.03c  | translation initiation factor eIF2B beta<br>subunit (predicted)                                 | 0.68 | SPAC823.06    | RCC domain protein Ats1 (predicted)                                          | 0.67 |
|              | adenine phosphoribosyltransferase (APRT)<br>(predicted)                                         | 0.68 | SPBC342.04    | anaphase-promoting complex subunit Apc3                                      | 0.66 |
| SPAC23A1.03  | CUE domain protein Cue1/4 family<br>involved in ER associated protein<br>catabolism (predicted) | 0.68 | SPBC18E5.07   | Sir2 family histone deacetylase Hst2                                         | 0.66 |
|              | GTP binding protein%2C HSR1-related<br>(predicted)                                              | 0.68 | SPBC2A9.04c   | mitochondrial and cytoplasmic arginine-<br>tRNA ligase Rrs1/Mrs1 (predicted) | 0.66 |
| SPAC3F10.16c | WD repeat protein Rrb1 (predicted)                                                              | 0.68 | SPAC1071.04c  | Wiskott-Aldrich syndrome homolog                                             | 0.66 |
| SPBC1711.07  | homoaconitate hydratase Lys2                                                                    | 0.67 | SPAC10F6.04   | binding protein Lsb1 (predicted)                                             | 0.66 |
| SPAC343.16   | Cdc25 family phosphatase Ibp1                                                                   | 0.67 | SPAC17C9.01c  | tRNA-splicing endonuclease subunit Sen54<br>(predicted)                      | 0.66 |
| SPBC839.07   | spermidine family transporter (predicted)                                                       | 0.67 | SPCC132.02    | Lsk1 complex gamma subunit (predicted)                                       | 0.66 |
| SPBC530.15c  | MFS myo-inositol transporter                                                                    | 0.67 |               |                                                                              |      |
| SPAC20G8.03  |                                                                                                 |      | SPBC25B2.09c  |                                                                              |      |
|              |                                                                                                 |      | SPBC119.05c   |                                                                              |      |
|              |                                                                                                 |      | SPCC613.09    |                                                                              |      |
|              |                                                                                                 |      | SPCC4B3.08    |                                                                              |      |



|              |                                              |      |               |                                            |      |
|--------------|----------------------------------------------|------|---------------|--------------------------------------------|------|
| SPAC31G5.13  | 19S proteasome regulatory subunit Rpn11      | 0.66 |               | ATP-dependent RNA helicase Has1            |      |
| SPAC1805.05  | serine/threonine protein kinase Cki3         | 0.66 | SPAC1F7.02c   | (predicted)                                | 0.65 |
| SPBC1271.12  | oxysterol binding protein (predicted)        | 0.66 |               | Lid2 complex subunit%2C histone            |      |
|              | U3 snoRNP-associated protein Utp21           |      | SPBC83.07     | demethylase H3-K36 specific Jmj3           | 0.65 |
| SPCC1672.07  | (predicted)                                  | 0.66 | SPAC222.04c   | Ino80 complex subunit Ies6                 | 0.65 |
| SPBC9B6.08   | clathrin light chain                         | 0.66 | SPBC106.14c   | SDA1 family protein (predicted)            | 0.65 |
|              | chaperonin-containing T-complex eta          |      | SPAC11G7.01   | sequence orphan                            | 0.65 |
| SPBC25H2.12c | subunit Cct7                                 | 0.66 | SPCC757.12    | alpha-amylase homolog (predicted)          | 0.65 |
|              | DNA-directed RNA polymerase I%2C II          |      |               | Noc2p-Noc3p complex subunit Noc2           |      |
| SPAC23C4.15  | and III subunit Rpb5                         | 0.66 | SPAC1B3.09c   | family (predicted)                         | 0.65 |
|              | alpha-1%2C2-galactosyltransferase Gmh1       |      | SPAC23G3.10c  | SWI/SNF and RSC complex subunit Ssr3       | 0.65 |
| SPAC5H10.11  | (predicted)                                  | 0.66 | SPAC25B8.01   | cytochrome P450 regulator Dap1             | 0.65 |
|              | diphthamide biosynthesis protein Dph3        |      | SPBC26H8.07c  | tubulin beta Nda3                          | 0.65 |
| SPAC8F11.02c | (predicted)                                  | 0.66 |               | mitochondrial ribosomal protein Ymr1       |      |
| SPAC26A3.17c | N-methyltransferase (predicted)              | 0.66 | SPBC21B10.14  | (predicted)                                | 0.65 |
|              | ubiquitin conjugating enzyme E2-C%2C         |      | SPAC17H9.14c  | protein disulfide isomerase                | 0.65 |
| SPCC1259.15c | Ubc11                                        | 0.66 |               | importin family nuclear export receptor    |      |
| SPCC1450.11c | serine/threonine protein kinase Cek1         | 0.66 | SPAC1805.17   | Crm1                                       | 0.65 |
|              | mitochondrial ribosomal protein subunit L1   |      |               | signal recognition particle receptor alpha |      |
| SPAC1610.02c | (predicted)                                  | 0.66 | SPBC3B9.03    | subunit Srp101 (predicted)                 | 0.65 |
| SPAC56E4.03  | aromatic aminotransferase (predicted)        | 0.66 | SPBP4H10.11c  | long-chain-fatty-acid-CoA ligase           | 0.65 |
|              | mitochondrial tricarboxylic acid transporter |      | SPAC227.05    | prefoldin subunit 4 (predicted)            | 0.65 |
| SPBC83.13    | (predicted)                                  | 0.66 | SPBP18G5.03   | Tor complex Tor2 interacting protein 1     | 0.65 |
| SPAPJ695.02  | sequence orphan                              | 0.66 |               | mitochondrial threonine ammonia-lyase      |      |
| SPAC2F7.03c  | DYRK family protein kinase Pom1              | 0.66 | SPBC1677.03c  | (predicted)                                | 0.65 |
| SPBC17A3.06  | phosphoprotein phosphatase (predicted)       | 0.66 | SPBC1271.01c  | F-box protein Pof13                        | 0.65 |
|              | DNA-directed RNA polymerase I complex        |      |               | mitochondrial ribosomal protein subunit S4 |      |
| SPBC1718.03  | subunit Ker1                                 | 0.66 | SPBC13G1.01c  | (predicted)                                | 0.65 |
| SPCC18.12c   | rRNA processing protein Utp23 (predicted)    | 0.66 | SPCC1672.03c  | guanine deaminase (predicted)              | 0.65 |
| SPAC4A8.03c  | protein phosphatase 2C Ptc4                  | 0.66 | SPAC664.11    | mitochondrial heat shock protein Hsp70     | 0.65 |
|              | ribose-phosphate pyrophosphokinase Prs5      |      | SPBC26H8.12   | cytochrome c heme lyase (predicted)        | 0.65 |
| SPBC3D6.06c  | (predicted)                                  | 0.66 | SPCPB16A4.03c | bifunctional IMP                           | 0.65 |

|               |                                                                                                               |      |               |                                                                                 |      |
|---------------|---------------------------------------------------------------------------------------------------------------|------|---------------|---------------------------------------------------------------------------------|------|
|               | cyclohydrolase/phosphoribosylaminoimida<br>zolecarboxamideformyltransferase                                   |      | SPAC9.13c     | gankyrin (predicted)                                                            |      |
| SPAC926.06c   | leucine-rich repeat protein%2C unknown                                                                        | 0.65 |               | splicing factor Cwf16                                                           | 0.63 |
| SPBC119.10    | asparagine synthetase                                                                                         | 0.65 | SPCC4B3.17    | ubiquinol cytochrome-c reductase assembly<br>protein Cbp3 (predicted)           | 0.63 |
| SPBC13G1.04c  | alkB homolog/2-OG-Fe(II) oxygenase<br>family Abh1 (predicted)                                                 | 0.65 | SPAC13C5.05c  | N-acetylglucosamine-phosphate mutase<br>(predicted)                             | 0.63 |
| SPAC30C2.08   | conserved fungal protein                                                                                      | 0.64 | SPAC19G12.16c | conserved fungal protein Adg2                                                   | 0.63 |
| SPAC1751.02c  | mitochondrial ribosomal protein subunit<br>S19 (predicted)                                                    | 0.64 | SPBC1778.01c  | zuotin (predicted)                                                              | 0.63 |
| SPBC1718.06   | mitochondrial dynamin family GTPase<br>Msp1                                                                   | 0.64 | SPBC3B9.02c   | splicing factor Cwf28                                                           | 0.63 |
| SPCC18.10     | pyridoxine-pyridoxal-pyridoxamine kinase<br>(predicted)                                                       | 0.64 | SPAC15A10.11  | UBR ubiquitin ligase Ubr11                                                      | 0.63 |
| SPBC16E9.03c  | mitochondrial inner membrane protein<br>involved in respiratory chain complex IV<br>assembly Coa1 (predicted) | 0.64 | SPAC1565.05   | sequence orphan                                                                 | 0.63 |
| SPAC29A4.07   | mediator complex subunit Srb6                                                                                 | 0.64 | SPCC1281.07c  | glutathione S-transferase (predicted)                                           | 0.63 |
| SPBPB21E7.01c | enolase (predicted)                                                                                           | 0.64 | SPBC19F5.05c  | pescadillo-family BRCT domain protein<br>(predicted)                            | 0.63 |
| SPBC119.08    | MAP kinase Pmk1                                                                                               | 0.64 | SPCC1259.08   | conserved fungal protein%2C DUF2457<br>family                                   | 0.63 |
| SPBC18H10.17c | mitochondrial recombinase Mhr1<br>(predicted)                                                                 | 0.64 | SPBC36.07     | elongator subunit Elp1 (predicted)                                              | 0.63 |
| SPBC119.14    | Rad22 homolog Rti1                                                                                            | 0.64 | SPAC977.17    | MIP water channel (predicted)                                                   | 0.63 |
| SPAC3H8.08c   | transcription factor (predicted)                                                                              | 0.64 | SPAC7D4.03c   | conserved fungal family                                                         | 0.63 |
| SPAC13G7.12c  | choline kinase (predicted)                                                                                    | 0.64 | SPBC365.08c   | Der1-like (degradation in the ER) family<br>(predicted)                         | 0.63 |
| SPAC4H3.09    | mitochondrial type II fatty acid synthase<br>component (predicted)                                            | 0.64 | SPBC887.18c   | SAGA complex subunit Hfi1                                                       | 0.63 |
| SPACUNK12.02c | calcium/calmodulin-dependent protein<br>kinase Cmk1                                                           | 0.64 | SPBC1773.07c  | Ran GTPase binding protein Sbp1                                                 | 0.63 |
| SPAC13A11.06  | pyruvate decarboxylase (predicted)                                                                            | 0.64 | SPBC17D1.04   | upstream activation factor complex subunit<br>Acr1                              | 0.63 |
| SPAC11D3.06   | MatE family transporter (predicted)                                                                           | 0.64 | SPCC830.08c   | ER membrane protein DP1/Yop1                                                    | 0.63 |
| SPBC530.05    | transcription factor (predicted)                                                                              | 0.64 | SPAC10F6.14c  | ABC1 kinase family protein (predicted)                                          | 0.63 |
| SPAC6C3.08    | proteasome regulatory particle%2C                                                                             | 0.64 | SPAC222.15    | Tat binding protein 1(TBP-1)-interacting<br>protein (TBPIP) homolog (predicted) | 0.63 |
|               |                                                                                                               |      | SPAC9.02c     | polyamine N-acetyltransferase (predicted)                                       | 0.62 |
|               |                                                                                                               |      | SPBC2G5.05    | transketolase (predicted)                                                       | 0.62 |
|               |                                                                                                               |      | SPCC1259.10   | mitochondrial metallopeptidase predicted to                                     | 0.62 |

|              |                                                                      |      |               |  |                                                                                                             |      |
|--------------|----------------------------------------------------------------------|------|---------------|--|-------------------------------------------------------------------------------------------------------------|------|
|              | be involved in tRNA<br>threonylcarbamoyladenine modification<br>Pgp1 |      |               |  | multifunctional enzyme (predicted)<br>phosphatidyl-N-methylethanolamine N-<br>methyltransferase (predicted) | 0.62 |
| SPAPB1A10.13 | sequence orphan                                                      | 0.62 | SPBC337.16    |  |                                                                                                             |      |
|              | mitochondrial inner membrane peptidase                               |      | SPBP8B7.02    |  | sequence orphan                                                                                             | 0.62 |
| SPBC2D10.07c | complex catalytic subunit (predicted)                                | 0.62 | SPBC1711.08   |  | chaperone activator Aha1 (predicted)                                                                        | 0.62 |
| SPAC23C4.13  | SNARE Bet1 (predicted)                                               | 0.62 | SPCC622.15c   |  | sequence orphan                                                                                             | 0.62 |
| SPAC144.04c  | ornithine decarboxylase Spe1 (predicted)                             | 0.62 | SPAC19B12.03  |  | 1%2C3-beta-glucan synthase subunit Bgs3                                                                     | 0.61 |
|              | superoxide dismutase copper chaperone                                |      | SPBC4.01      |  | tetraspan protein Dni2 (predicted)                                                                          | 0.61 |
| SPAC22E12.04 | Ccs1                                                                 | 0.62 | SPAC688.11    |  | Huntingtin-interacting protein homolog                                                                      | 0.61 |
| SPBC14C8.13  | SRR1 family protein                                                  | 0.62 | SPBP16F5.04   |  | ubiquitin conjugating enzyme Ubc7/UbcP3                                                                     | 0.61 |
| SPAC12G12.09 | conserved fungal protein                                             | 0.62 | SPAC57A10.10c |  | La protein homolog                                                                                          | 0.61 |
|              | U3 snoRNP-associated protein Utp16                                   |      | SPCC757.03c   |  | ThiJ domain protein                                                                                         | 0.61 |
| SPBP8B7.10c  | (predicted)                                                          | 0.62 | SPCC162.03    |  | short chain dehydrogenase (predicted)                                                                       | 0.61 |
| SPAC10F6.01c | sulfite reductase Sir1                                               | 0.62 |               |  | mitochondrial inorganic phosphate                                                                           |      |
|              | TIM23 translocase complex subunit Tim17                              |      | SPBC1703.13c  |  | transporter (predicted)                                                                                     | 0.61 |
| SPAC3A12.16c | (predicted)                                                          | 0.62 |               |  | mitochondrial cytochrome c-heme linkage<br>protein Cyc2 (predicted)                                         | 0.61 |
|              | U3 snoRNP-associated protein Utp3                                    |      | SPAC17H9.12c  |  | sequence orphan                                                                                             | 0.61 |
| SPBC3B8.09   | (predicted)                                                          | 0.62 | SPBC651.07    |  | transcription elongation factor TFIIIS                                                                      | 0.61 |
|              | NatA N-acetyltransferase complex                                     |      | SPAC20H4.03c  |  | sequence orphan                                                                                             | 0.61 |
| SPCC338.07c  | regulatory subunit Naa15 (predicted)                                 | 0.62 | SPBC36.11     |  | phosphoserine aminotransferase (predicted)                                                                  | 0.61 |
| SPBC409.09c  | kinetochore protein Mis13                                            | 0.62 | SPAC1F12.07   |  | CAAX prenyl protease (predicted)                                                                            | 0.61 |
|              | TIM22 inner membrane protein import                                  |      | SPAC3H1.05    |  | Ergothioneine biosynthesis protein Egt2                                                                     | 0.61 |
| SPBC1347.04  | complex subunit Tim54 (predicted)                                    | 0.62 | SPBC660.12c   |  | glutathione transporter Pgt1                                                                                | 0.61 |
| SPAC57A7.09  | human RNF family homolog                                             | 0.62 | SPAC29B12.10c |  | conserved fungal protein                                                                                    | 0.61 |
| SPBC18H10.02 | long-chain-fatty-acid-CoA ligase Lcf1                                | 0.62 | SPCPB16A4.02c |  | ER to Golgi transport protein Yos1                                                                          |      |
|              | NADH-dependent flavin oxidoreductase                                 |      |               |  | (predicted)                                                                                                 | 0.61 |
| SPBC23G7.10c | (predicted)                                                          | 0.62 | SPAC19A8.09   |  | ubiquitin conjugating enzyme Ubc6                                                                           |      |
| SPAPJ696.01c | retromer complex subunit Vps17                                       | 0.62 |               |  | (predicted)                                                                                                 | 0.61 |
|              | mitochondrial ribosomal protein subunit                              |      | SPAC10F6.05c  |  | RNA-binding protein Scw1                                                                                    | 0.61 |
| SPBC1604.13c | L32 (predicted)                                                      | 0.62 | SPCC16C4.07   |  | CENP-N%2C kinetochore protein Mis15                                                                         | 0.61 |
| SPBC1539.09c | anthranilate synthase component II%2C                                | 0.62 | SPBP22H7.09c  |  | 19S proteasome regulatory subunit Rpn3                                                                      | 0.61 |
|              |                                                                      |      | SPBC119.01    |  |                                                                                                             |      |

|               |                                                                                       |      |              |                                                                |      |
|---------------|---------------------------------------------------------------------------------------|------|--------------|----------------------------------------------------------------|------|
| SPAC1B3.04c   | mitochondrial GTPase involved in translation Guf1 (predicted)                         | 0.61 | SPCC285.06c  | wtf element Wtf17                                              | 0.60 |
|               | ER membrane protein complex subunit                                                   |      | SPAC6B12.07c | ubiquitin-protein ligase E3 (predicted)                        | 0.60 |
| SPBC1711.03   | Aim27 (predicted)                                                                     | 0.61 | SPAC3H1.03   | mouse transcriptional regulator%2C HCNGP-like (predicted)      | 0.60 |
| SPCC14G10.04  | sequence orphan                                                                       | 0.61 |              | MRG family Clr6 histone deacetylase complex subunit Alp13      | 0.60 |
| SPCC4G3.17    | HD domain metal dependent phosphohydrolase (predicted)                                | 0.61 | SPAC23H4.12  | RNA polymerase II accessory factor%2C Cdc73 family (predicted) | 0.60 |
| SPAC25B8.09   | trans-aconitate 3-methyltransferase (predicted)                                       | 0.61 | SPBC17G9.02c | manganese superoxide dismutase (predicted)                     | 0.60 |
| SPAC22A12.02c | sequence orphan                                                                       | 0.61 | SPAC1486.01  | beclin family protein%2C involved in autophagy                 | 0.60 |
| SPAC2F3.06c   | karyopherin Kap104                                                                    | 0.61 | SPAC20G8.10c | Ino80 complex subunit Iec1                                     | 0.60 |
| SPAC4F8.12c   | U5 snRNP complex subunit Spp42                                                        | 0.61 | SPAC144.02   | CRCB domain protein                                            | 0.60 |
| SPAC4D7.08c   | amidophosphoribosyltransferase Ade4                                                   | 0.61 | SPAC977.11   | 60S ribosomal protein L8 (predicted)                           | 0.60 |
|               | FAD-dependent oxidoreductase involved in late endosome to Golgi transport (predicted) | 0.61 | SPBC839.04   | TRAPP complex subunit Trs31 (predicted)                        | 0.60 |
| SPAC1F5.03c   | Pho85/PhoA-like cyclin-dependent kinase                                               |      | SPBC1718.05  | FKBP12 peptidyl-prolyl cis-trans isomerase                     | 0.60 |
| SPCC16C4.11   | Pef1                                                                                  | 0.61 | SPBC839.17c  | Fkh1                                                           | 0.60 |
|               | mitochondrial TOM complex subunit                                                     |      | SPBC211.05   | splicing factor 3B                                             | 0.60 |
| SPBC27B12.13  | Tom40 (predicted)                                                                     | 0.61 | SPAC10F6.07c | sequence orphan                                                | 0.60 |
| SPAC23C4.07   | meiotically upregulated gene Mug22                                                    | 0.61 |              | DNA polymerase alpha accessory factor                          |      |
| SPCC1450.05c  | mediator complex subunit Med19/Rox3                                                   | 0.61 | SPAPB1E7.02c | Mcl1                                                           | 0.60 |
| SPBC1709.14   | peptide N-glycanase (predicted)                                                       | 0.61 | SPBC215.10   | haloacid dehalogenase-like hydrolase                           | 0.60 |
| SPBP8B7.13    | Vac7 ortholog (predicted)                                                             | 0.61 | SPAC1834.09  | variant protein kinase 19 family protein                       | 0.60 |
|               | siderophore-iron biosynthesis protein (predicted)                                     | 0.60 | SPAP7G5.04c  | aminoadipate-semialdehyde dehydrogenase                        | 0.60 |
| SPBC17G9.06c  |                                                                                       |      | SPAC222.09   | RNA-binding protein Seb1                                       | 0.60 |
| SPBC13E7.04   | F1-ATPase delta subunit (predicted)                                                   | 0.60 | SPBC947.10   | Golgi Dsc E3 ligase complex subunit Dsc1                       | 0.60 |
|               | ribosome biogenesis protein Nsa2 (predicted)                                          | 0.60 | SPAC513.03   | M-factor precursor Mfm2                                        | 0.60 |
| SPCP1E11.08   |                                                                                       |      | SPCC962.06c  | zinc finger splicing factor Bpb1                               | 0.60 |
|               | U3 snoRNP-associated protein Utp6 (predicted)                                         | 0.60 | SPBC23E6.06c | 3%2C4-dihydroxy-2-butanone 4-phosphate synthase (predicted)    | 0.60 |
| SPBC244.02c   |                                                                                       |      | SPAC222.18   | Srp1 family splicing factor (predicted)                        | 0.60 |
| SPAC2E1P3.01  | dehydrogenase (predicted)                                                             | 0.60 |              |                                                                |      |

|               |                                             |      |              |                                            |      |
|---------------|---------------------------------------------|------|--------------|--------------------------------------------|------|
| SPAC1F7.12    | aldose reductase ARK13 family YakC          | 0.59 |              | NADPH-dependent diflavin                   |      |
|               | histone lysine methyltransferase Set6       |      |              | oxidoreductase%2C involved in iron-sulfur  |      |
| SPBP8B7.07c   | (predicted)                                 | 0.59 | SPAC1296.06  | cluster assembly Tah18 (predicted)         | 0.59 |
| SPAC3G6.02    | mRNA export protein Dss1                    | 0.59 | SPBC13G1.14c | RNA-binding protein (predicted)            | 0.59 |
|               | COPII-coated vesicle component Emp24        |      |              | N-acetyl-gamma-glutamyl-phosphate          |      |
| SPCC24B10.17  | (predicted)                                 | 0.59 | SPAC4G9.09c  | reductase/acetylglutamate kinase           | 0.59 |
| SPBC30B4.04c  | SWI/SNF complex subunit Sol1                | 0.59 | SPAC11D3.01c | conserved fungal protein                   | 0.59 |
|               | mitochondrial ribosomal protein subunit     |      | SPCC1753.01c | single-stranded DNA binding protein Ssb2   | 0.59 |
| SPBC409.14c   | S17 (predicted)                             | 0.59 | SPBC16C6.12c | Las1 pre-rRNA processing protein           | 0.59 |
|               | phosphoric ester hydrolase Ssu72            |      |              | ribosome biogenesis protein Ytm1           |      |
| SPAC3G9.04    | (predicted)                                 | 0.59 | SPAC890.04c  | (predicted)                                | 0.59 |
| SPAC1F12.08   | cytidyltransferase (predicted)              | 0.59 | SPBC14C8.05c | glucan-alpha-1%2C4-glucosidase             | 0.59 |
|               | CCR4-Not complex subunit Mot2               |      | SPBC21D10.12 | BAR adaptor protein Hob1                   | 0.59 |
| SPAC16C9.04c  | (predicted)                                 | 0.59 |              | mitochondrial ribosomal protein subunit    |      |
|               | EF-1 alpha binding zinc finger protein Zpr1 |      | SPCC4B3.09c  | L12 (predicted)                            | 0.58 |
| SPAC15A10.04c | (predicted)                                 | 0.59 |              | mRNA export receptor%2C Tap%2C             |      |
| SPCC584.05    | SNARE binding protein Sec1 (predicted)      | 0.59 | SPBC1921.03c | nucleoporin Mex67                          | 0.58 |
|               | mitochondrial inheritance GTPase%2C         |      |              | NIM1 family serine/threonine protein       |      |
| SPAC30C2.06c  | tubulin-like (predicted)                    | 0.59 | SPAC644.06c  | kinase Cdr1/Nim1                           | 0.58 |
|               | ribosome biogenesis protein Ltv1            |      |              | tRNA-splicing endonuclease catalytic       |      |
| SPAC3F10.17   | (predicted)                                 | 0.59 | SPBC19C7.07c | subunit Sen34 (predicted)                  | 0.58 |
| SPBC106.04    | adenosine deaminase Ada1 (predicted)        | 0.59 |              | tRNA (guanine) methyltransferase Trm5      |      |
|               | mitochondrial ribosomal protein subunit     |      | SPAPB18E9.01 | (predicted)                                | 0.58 |
| SPBC2F12.10   | L35 (predicted)                             | 0.59 | SPCC1450.13c | riboflavin synthase                        | 0.58 |
|               | cytoplasmic cysteine-tRNA ligase Crs1       |      | SPAC1556.08c | protein kinase activator (predicted)       | 0.58 |
| SPAC29E6.06c  | (predicted)                                 | 0.59 | SPCC663.05c  | histone chaperone Cia1                     | 0.58 |
| SPAC3A12.13c  | translation initiation factor eIF3j (p35)   | 0.59 |              | mitochondrial membrane protein Mgr2        |      |
| SPAC2C4.08    | conserved fungal protein                    | 0.59 | SPBC27.06c   | (predicted)                                | 0.58 |
| SPAC4C5.02c   | GTPase Ryh1                                 | 0.59 |              | ribosome biogenesis protein Noc1           |      |
|               | mitochondrial manganese ion transporter     |      | SPAC4F10.09c | (predicted)                                | 0.58 |
| SPBP23A10.06  | (predicted)                                 | 0.59 | SPCC24B10.20 | short chain dehydrogenase (predicted)      | 0.58 |
| SPAC1399.03   | uracil permease                             | 0.59 | SPAC1002.04c | transcription factor TFIID complex subunit | 0.58 |

|               |                                                                                    |      |               |                                                                         |      |
|---------------|------------------------------------------------------------------------------------|------|---------------|-------------------------------------------------------------------------|------|
|               | Taf11 (predicted)                                                                  |      |               | acetyltransferase subunit E1p3 (predicted)                              |      |
| SPBC947.01    | ATP-dependent microtubule severing protein (predicted)                             | 0.58 | SPAC1D4.08    | CDP-diacylglycerol--inositol 3-phosphatidyltransferase Pis1 (predicted) | 0.57 |
| SPBC27B12.12c | CorA family magnesium ion transporter (predicted)                                  | 0.58 | SPCC24B10.04  | sequence orphan                                                         | 0.57 |
| SPBC23G7.13c  | urea transporter (predicted)                                                       | 0.58 | SPAC17G8.08c  | human TMEM165 homolog                                                   | 0.57 |
| SPAC513.07    | flavonol reductase/cinnamoyl-CoA reductase family                                  | 0.58 | SPCC1906.01   | mannose-1-phosphate guanyltransferase Mpg1                              | 0.57 |
| SPCC622.02    | dubious                                                                            | 0.58 | SPBC8E4.03    | agmatinase 2 (predicted)                                                | 0.57 |
| SPBC216.03    | conserved fungal protein                                                           | 0.58 | SPBC530.08    | membrane-tethered transcription factor (predicted)                      | 0.57 |
| SPBC24C6.05   | coatamer epsilon subunit (predicted)                                               | 0.58 | SPAC3G9.08    | ING family homolog Png1                                                 | 0.57 |
| SPAC13G7.10   | Myb family telomere binding protein (predicted)                                    | 0.58 | SPBC887.22    | signal peptidase complex subunit Spc1 (predicted)                       | 0.57 |
| SPAC23G3.07c  | SWI/SNF complex subunit Snf30                                                      | 0.58 | SPAC22H12.01c | sequence orphan                                                         | 0.57 |
| SPBC1703.09   | sequence orphan                                                                    | 0.58 | SPBC18H10.03  | translation initiation factor eIF3g                                     | 0.57 |
| SPAC22F8.06   | 20S proteasome complex subunit beta 6 translocon subunit Sec61 homolog (predicted) | 0.58 | SPAC4G8.06c   | tRNA methyltransferase Trm12 (predicted)                                | 0.57 |
| SPBC19G7.17   | glycerophosphoryl diester phosphodiesterase (predicted)                            | 0.58 | SPBC1539.03c  | argininosuccinate lyase (predicted)                                     | 0.57 |
| SPAC4D7.02c   | 19S proteasome regulatory subunit Rpt2                                             | 0.58 | SPAC22A12.11  | dihydroxyacetone kinase Dak1                                            | 0.57 |
| SPBC4.07c     | oxysterol binding protein (predicted)                                              | 0.58 | SPAC23A1.18c  | mitochondrial ribosomal protein subunit L51-b (predicted)               | 0.57 |
| SPBC354.07c   | sequence orphan                                                                    | 0.58 | SPAPJ760.03c  | sequence orphan                                                         | 0.57 |
| SPBC21C3.14c  | gfo/idh/mocA family oxidoreductase (predicted)                                     | 0.58 | SPACUNK4.16c  | alpha%2Calpha-trehalose-phosphate synthase (predicted)                  | 0.57 |
| SPAC26H5.09c  | translation initiation factor eIF1A-like (predicted)                               | 0.57 | SPCC126.12    | NGG1 interacting factor 3 family%2C implicated in transcription         | 0.56 |
| SPBC146.08c   | C-methyltransferase (predicted)                                                    | 0.57 | SPBC1604.06c  | CBF/Mak21 family (predicted)                                            | 0.56 |
| SPCC4G3.04c   | DUF185 protein%2C mitochondrial                                                    | 0.57 | SPBP8B7.31    | acid phosphatase (predicted)                                            | 0.56 |
| SPAC25A8.03c  | SWI/SNF and RSC complex subunit Arp9                                               | 0.57 | SPBC21C3.07c  | tRNA (cytosine) methyltransferase (predicted)                           | 0.56 |
| SPAC1071.06   | GTPase activating protein Gap1                                                     | 0.57 | SPBC16C6.07c  | 19S proteasome regulatory subunit Rpt1 (predicted)                      | 0.56 |
| SPBC646.12c   | elongator complex%2C histone                                                       | 0.57 | SPAC17A2.08c  | spliceosome complex disassembly protein                                 | 0.56 |

|              |                                                                                                                                                |      |              |                                                                                                        |      |
|--------------|------------------------------------------------------------------------------------------------------------------------------------------------|------|--------------|--------------------------------------------------------------------------------------------------------|------|
| SPBC577.11   | Ntr2 (predicted)<br>DUF3074 family protein<br>mitochondrial matrix PGP phosphatase<br>involved in cardiolipin biosynthesis Gep4<br>(predicted) | 0.56 | SPAC926.08c  | Brix domain protein Rpf2 (predicted)<br>alpha-1%2C2-mannosyltransferase Omh3<br>(predicted)            | 0.55 |
| SPCC645.02   | ribosome export GTPase (predicted)                                                                                                             | 0.56 | SPCC777.07   | xylose and arabinose reductase (predicted)                                                             | 0.55 |
| SPAC6F6.03c  | Rab GTPase binding (predicted)                                                                                                                 | 0.56 | SPBC28F2.05c | U1 snRNP-associated protein Usp104                                                                     | 0.55 |
| SPAC227.06   | ubiquitin C-terminal hydrolase Uch2                                                                                                            | 0.56 | SPAC4D7.13   | NAD/NADH kinase (predicted)                                                                            | 0.55 |
| SPBC409.06   | ribosomal DNA (rDNA) transcription<br>factor Rrn3                                                                                              | 0.56 | SPAC1B1.02c  | nucleoporin Nup60                                                                                      | 0.55 |
| SPAC18G6.11c | PP2A-type phosphatase inhibitor                                                                                                                | 0.56 | SPCC285.13c  | DNA-directed RNA polymerase III<br>complex large subunit Rpc1 (predicted)                              | 0.55 |
| SPBC646.13   | Sds23/Moc1                                                                                                                                     | 0.56 | SPBC651.08c  | U3 snoRNP-associated protein Utp7<br>(predicted)                                                       | 0.55 |
| SPBC23G7.11  | DNA-3-methyladenine glycosidase Mag2                                                                                                           | 0.56 | SPAC959.03c  | protein phosphatase inhibitor (predicted)                                                              | 0.55 |
| SPBP35G2.12  | ADP-ribose diphosphatase%2C NudF<br>subfamily (predicted)                                                                                      | 0.56 | SPAC6B12.13  | sequence orphan                                                                                        | 0.55 |
| SPAC17C9.08  | mitochondrial endodeoxyribonuclease Pnu1                                                                                                       | 0.56 | SPAC7D4.13c  | RNase P subunit Rpr2 (predicted)                                                                       | 0.55 |
| SPCC338.11c  | protein-lysine N-methyltransferase Rrg1<br>(predicted)                                                                                         | 0.56 | SPBC1105.16c | T5orf172 family protein                                                                                | 0.55 |
| SPBP8B7.26   | sequence orphan                                                                                                                                | 0.56 | SPAC3F10.05c | ADP-ribosylation factor%2C Arf family<br>Arf1                                                          | 0.55 |
| SPAC1F8.03c  | siderophore-iron transporter Str3                                                                                                              | 0.56 | SPBC4F6.18c  | IPT/TIG ankyrin repeat containing<br>transcription regulator of fatty acid<br>biosynthesis (predicted) | 0.55 |
| SPBC3H7.15   | serine/threonine protein kinase Hhp1                                                                                                           | 0.56 | SPAC26H5.05  | armadillo repeat containing%2C Zfs1 target<br>number 1                                                 | 0.55 |
| SPCC4B3.05c  | uroporphyrinogen decarboxylase Hem12<br>(predicted)                                                                                            | 0.56 | SPCC1494.03  | 3'-5' exoribonuclease subunit Dis3<br>(predicted)                                                      | 0.55 |
| SPBC119.09c  | ORMDL family protein (predicted)                                                                                                               | 0.56 | SPBC26H8.10  | sequence orphan Meu31                                                                                  | 0.55 |
| SPBC31F10.16 | ChAPs family protein (predicted)                                                                                                               | 0.56 | SPAC1A6.06c  | diphthamide biosynthesis protein<br>(predicted)                                                        | 0.55 |
| SPCC622.03c  | hypothetical protein                                                                                                                           | 0.55 | SPBC17D1.02  | RNA-binding protein Tma20 (predicted)                                                                  | 0.55 |
| SPBC56F2.08c | RNA-binding protein (predicted)                                                                                                                | 0.55 | SPBC31F10.12 | glutathione-dependent formaldehyde<br>dehydrogenase (predicted)                                        | 0.55 |
| SPAC688.13   | TatD DNase family Scn1                                                                                                                         | 0.55 | SPBC1198.01  | splicing factor Cwf7                                                                                   | 0.55 |
| SPCC965.14c  | cytosine deaminase (predicted)                                                                                                                 | 0.55 | SPBC28F2.04c | zinc ion transporter Zhf1                                                                              | 0.55 |
| SPCP1E11.04c | membrane associated protein Pal1                                                                                                               | 0.55 | SPAC23C11.14 |                                                                                                        |      |
| SPBC6B1.06c  | ubiquitin C-terminal hydrolase Ubp14                                                                                                           | 0.55 |              |                                                                                                        |      |
| SPAC13G6.05c | TRAPP complex subunit Trs33 (predicted)                                                                                                        | 0.55 |              |                                                                                                        |      |

|               |                                            |      |               |                                               |      |
|---------------|--------------------------------------------|------|---------------|-----------------------------------------------|------|
| SPCC622.21    | wtf element Wtf12                          | 0.55 | SPAC186.09    | pyruvate decarboxylase (predicted)            | 0.54 |
| SPBC4.06      | acid phosphatase (predicted)               | 0.55 | SPBC1289.06c  | mitochondrial PPR repeat protein Ppr8         | 0.54 |
|               | mitochondrial sulfhydryl oxidase           |      | SPCC1450.16c  | triacylglycerol lipase ptl1                   | 0.54 |
| SPAC3G6.08    | (predicted)                                | 0.55 | SPBC725.09c   | BAR adaptor protein Hob3                      | 0.54 |
| SPCC1020.01c  | P-type proton ATPase%2C P3-type Pma2       | 0.54 | SPBP4H10.21c  | GINS complex subunit Sld5                     | 0.54 |
|               | iron-sulfur cluster assembly ATPase Nbp35  |      | SPBC18H10.04c | translation initiation factor (predicted)     | 0.54 |
| SPAC637.08    | (predicted)                                | 0.54 | SPAC23C4.03   | haspin related kinase Hrk1                    | 0.54 |
|               | U1 snRNP-associated protein Usp101         |      | SPCC297.03    | serine/threonine protein kinase Ssp1          | 0.54 |
| SPAC19A8.13   | (predicted)                                | 0.54 | SPBC2F12.15c  | palmitoyltransferase Pfa3 (predicted)         | 0.54 |
|               | BAG family molecular chaperone regulator   |      | SPBPB8B6.03   | acetamidase (predicted)                       | 0.54 |
| SPBC16G5.11c  | Bag101 (predicted)                         | 0.54 | SPAC6G9.02c   | RNA-binding protein Nop9 (predicted)          | 0.53 |
| SPCC16C4.22   | DNA polymerase epsilon Dpb3 (predicted)    | 0.54 |               | V-type ATPase V0 subunit c (proteolipid       |      |
|               | nuclear HMG-like acidic protein Mak16      |      | SPAC1B3.14    | subunit)                                      | 0.53 |
| SPAC222.06    | (predicted)                                | 0.54 | SPAC1952.04c  | conserved fungal protein                      | 0.53 |
| SPBC1703.07   | ATP citrate synthase subunit 1 (predicted) | 0.54 |               | cell surface glycoprotein%2C adhesion         |      |
| SPAC6B12.14c  | conserved fungal protein                   | 0.54 |               | molecule (predicted)%2C DUF1773 family        |      |
|               | serine/threonine protein kinase Ppk22      |      | SPBC337.02c   | protein 6                                     | 0.53 |
| SPBC1861.09   | (predicted)                                | 0.54 | SPAC1834.01   | translation release factor eRF1               | 0.53 |
| SPBC12D12.08c | ubiquitin-like protein modifier Ned8       | 0.54 |               | mitochondrial heat shock protein Hsp10        |      |
| SPBP8B7.20c   | RNA methyltransferase Nop2 (predicted)     | 0.54 | SPCC550.06c   | (predicted)                                   | 0.53 |
|               | copper transporting ATPase Ccc2            |      |               | sec14 cytosolic factor family                 |      |
| SPBC29A3.01   | (predicted)                                | 0.54 | SPAC3H8.02    | phosphatidylinositol transporter (predicted)  | 0.53 |
|               | ribonuclease MRP complex subunit           |      |               | plasma membrane protein involved in           |      |
| SPAC323.08    | (predicted)                                | 0.54 | SPCC16A11.01  | inositol lipid-mediated signaling (predicted) | 0.53 |
| SPAC56F8.11   | signal peptidase subunit Spc3 (predicted)  | 0.54 |               | TPR repeat protein%2C involved in             |      |
|               | DNAJ domain protein%2C involved in         |      | SPAP27G11.02  | mitochondrial protein turnover (predicted)    | 0.53 |
| SPCC830.07c   | translation initiation Psi1                | 0.54 | SPAC29A4.22   | dubious                                       | 0.53 |
| SPCC330.02    | Rad7 homolog Rhp7                          | 0.54 | SPAC30D11.04c | nucleoporin Nup124                            | 0.53 |
| SPAP14E8.03   | SNARE Bos1 (predicted)                     | 0.54 | SPAC1834.07   | kinesin-like protein Klp3                     | 0.53 |
| SPBC29A10.09c | CAF1 family ribonuclease (predicted)       | 0.54 |               | CCR4-Not complex subunit Not2                 |      |
| SPAC14C4.12c  | clr6 L associated factor 1 Laf1            | 0.54 | SPCC4G3.15c   | (predicted)                                   | 0.53 |
| SPBC19C2.14   | Sm snRNP core protein Smd3                 | 0.54 | SPAC23C11.13c | xanthine phosphoribosyltransferase            | 0.53 |



|              |                                              |      |              |                                            |      |
|--------------|----------------------------------------------|------|--------------|--------------------------------------------|------|
|              | (predicted)                                  |      | SPAC1F7.14c  | mitochondrial conserved protein            | 0.52 |
|              | heavy metal ion homeostasis protein          |      |              | ankyrin repeat protein%2C unknown          |      |
| SPAC328.07c  | (predicted)                                  | 0.53 | SPCP1E11.10  | biological role                            | 0.52 |
| SPBC29A3.05  | Swr1 complex subunit Vps71                   | 0.53 | SPBC1105.18c | peptide release factor (predicted)         | 0.52 |
| SPAC22F3.07c | F0-ATPase subunit G (predicted)              | 0.53 |              | methionine aminopeptidase Fma2             |      |
|              | alpha-1%2C2-galactosyltransferase            |      | SPBC14C8.03  | (predicted)                                | 0.52 |
| SPBC8D2.17   | (predicted)                                  | 0.53 | SPBC30D10.15 | snoRNP assembly factor Naf1 (predicted)    | 0.52 |
|              | 4-alpha-hydroxytetrahydrobiopterin           |      | SPBC582.07c  | 19S proteasome regulatory subunit Rpn7     | 0.52 |
| SPAC27D7.04  | dehydratase (predicted)                      | 0.53 | SPCC550.02c  | RNA-binding protein Cwf5                   | 0.52 |
| SPBC725.01   | aspartate aminotransferase (predicted)       | 0.52 |              | CCAAT-binding factor complex subunit       |      |
|              | anthranilate synthase component I            |      | SPAC23C11.08 | Php3                                       | 0.52 |
| SPCC1442.09  | (predicted)                                  | 0.52 | SPBC26H8.13c | Siva family protein (predicted)            | 0.52 |
|              | TIM22 inner membrane protein import          |      | SPBC25B2.03  | zf-C3HC4 type zinc finger                  | 0.51 |
| SPBC25H2.04c | complex subunit Tim22 (predicted)            | 0.52 | SPAC1039.03  | esterase/lipase (predicted)                | 0.51 |
|              | chaperonin-containing T-complex epsilon      |      |              | mitochondrial TOM complex subunit          |      |
| SPAC1420.02c | subunit Cct5                                 | 0.52 | SPAC6B12.12  | Tom70 (predicted)                          | 0.51 |
| SPAC4F10.15c | WASp homolog                                 | 0.52 |              | cyclin-dependent protein kinase regulatory |      |
| SPAC23C4.12  | serine/threonine protein kinase Hhp2         | 0.52 | SPBC1734.14c | subunit Suc1                               | 0.51 |
|              | cyclin-dependent protein Srb mediator        |      |              | methionine aminopeptidase Fma1             |      |
| SPAC23H4.17c | subunit kinase Srb10                         | 0.52 | SPBC3E7.10   | (predicted)                                | 0.51 |
|              | electron transfer flavoprotein alpha subunit |      |              | mitochondrial NADH dehydrogenase           |      |
| SPAC27D7.06  | (predicted)                                  | 0.52 | SPBC947.15c  | (predicted)                                | 0.51 |
| SPBP8B7.04   | sequence orphan                              | 0.52 | SPAC644.13c  | Rab GTPase binding (predicted)             | 0.51 |
|              | Sjogren's syndrome/scleroderma               |      |              | LIM-like protein linking chromatin         |      |
| SPBC3B8.08   | autoantigen 1 family (predicted)             | 0.52 | SPBP8B7.28c  | modification to RNAi%2C Stc1               | 0.51 |
| SPAC630.04c  | sequence orphan                              | 0.52 |              | integral inner nuclear membrane protein    |      |
| SPBC2D10.10c | fibrillarin%2C rRNA methyltransferase        | 0.52 | SPCC737.03c  | Ima1                                       | 0.51 |
|              | protein phosphatase regulatory subunit       |      | SPBC16E9.18  | phosphatidylserine decarboxylase Psd1      | 0.51 |
| SPAC17A5.09c | Glc9 (predicted)                             | 0.52 | SPCC584.11c  | Svf1 family protein Svf1                   | 0.51 |
| SPAC2C4.11c  | RNA-binding protein Rbp28                    | 0.52 | SPAC14C4.16  | DASH complex subunit Dad3                  | 0.51 |
|              | U3 snoRNP-associated protein Utp1            |      |              | U2 snRNP-associated protein Msl1           |      |
| SPBC713.04c  | (predicted)                                  | 0.52 | SPBC8D2.09c  | (predicted)                                | 0.51 |

|              |                                                                               |      |              |                                                                     |      |
|--------------|-------------------------------------------------------------------------------|------|--------------|---------------------------------------------------------------------|------|
| SPAC4G8.07c  | tRNA (m5U54) methyltransferase Trm2 (predicted)                               | 0.51 | SPBC119.18   | mitochondrial distribution and morphology protein Mdm35 (predicted) | 0.50 |
| SPAC4G9.04c  | cleavage and polyadenylation specificity factor (predicted)                   | 0.51 |              | 3'(2')%2C5'-bisphosphate                                            |      |
| SPBP8B7.19   | FACT complex subunit Spt16                                                    | 0.51 | SPCC1753.04  | nucleotidase/inositol-1%2C4- bisphosphate                           |      |
| SPAC11D3.05  | MFS family membrane transporter (predicted)                                   | 0.51 | SPBC31F10.05 | 1-phosphatase                                                       | 0.50 |
| SPCC16C4.08c | p21 activated protein kinase inhibitor Skb15                                  | 0.51 | SPAC664.12c  | sequence orphan                                                     | 0.50 |
| SPAC227.09   | folylpolyglutamate synthase (predicted)                                       | 0.51 | SPBC3E7.15c  | mitochondrial succinate dehydrogenase assembly factor 1 (predicted) | 0.50 |
| SPBP8B7.24c  | autophagy associated protein Atg8                                             | 0.51 | SPBC582.03   | sphingosine N-acyltransferase Lac1                                  | 0.50 |
| SPCC550.11   | karyopherin (predicted)                                                       | 0.51 |              | G2/M B-type cyclin Cdc13                                            | 0.50 |
| SPAC4G8.02c  | translocon gamma subunit Sss1 (predicted)                                     | 0.51 | SPBC12C2.11  | glutamine-fructose-6-phosphate                                      |      |
|              | mRNA cleavage and polyadenylation specificity factor complex endoribonuclease |      | SPAC630.03   | transaminase (predicted)                                            | 0.50 |
| SPAC17G6.16c | subunit Ysh1                                                                  | 0.51 | SPCC1183.02  | actin-like protein Arp3                                             | 0.50 |
| SPBC56F2.15  | sequence orphan                                                               | 0.51 | SPCC18.11c   | glutathione S-transferase (predicted)                               | 0.50 |
|              | zinc knuckle TRAMP complex subunit                                            |      | SPBC1718.02  | Dpy-30 domain protein Sdc1                                          | 0.50 |
| SPBP35G2.08c | Air1                                                                          | 0.51 | SPCC16C4.09  | linear element associated protein Hop1                              | 0.50 |
| SPAC19G12.14 | 1-phosphatidylinositol-4-phosphate 5-kinase Its3                              | 0.51 |              | RNB-like protein                                                    | 0.50 |
| SPAC2C4.03c  | Sm snRNP core protein Smd2                                                    | 0.51 | SPBC13E7.11  | mitochondrial rhomboid protease (predicted)                         | 0.50 |
| SPBC4C3.10c  | 20S proteasome complex subunit beta 1                                         |      | SPAC23H3.11c | glucosidase (predicted)                                             | 0.50 |
| SPBC16G5.03  | Pre3 (predicted)                                                              | 0.51 | SPBC21B10.09 | acetyl-CoA transporter (predicted)                                  | 0.50 |
| SPAC10F6.13c | ubiquitin-protein ligase E3 (predicted)                                       | 0.51 |              | vacuolar import and degradation protein                             |      |
| SPBC32F12.02 | aspartate aminotransferase (predicted)                                        | 0.51 | SPAC26H5.04  | Vid28 (predicted)                                                   | 0.50 |
|              | Ski complex subunit Rec14                                                     |      | SPAC4F8.14c  | 3-hydroxy-3-methylglutaryl-CoA synthase                             | 0.50 |
| SPAC1687.19c | queuine tRNA-ribosyltransferase (predicted)                                   | 0.51 | SPAC1B2.03c  | GNS1/SUR4 family protein (predicted)                                | 0.50 |
| SPAC3G9.15c  | rRNA processing protein Fcf2 (predicted)                                      | 0.51 | SPBC3D6.05   | phosphatidate cytidyltransferase Ptp4 (predicted)                   | 0.50 |
| SPAC186.06   | ER unfolded protein response protein (predicted)                              | 0.51 | SPCC70.03c   | proline dehydrogenase (predicted)                                   | 0.50 |
|              |                                                                               |      | SPBC16C6.04  | double strand break localizing protein Db16                         | 0.50 |
|              |                                                                               |      | SPBC16A3.15c | tubulin alpha 1                                                     | 0.50 |

| <b>Systematic name</b> | <b>Description</b>                        | <b>H4K20<br/>me2</b> |               |                                            |      |
|------------------------|-------------------------------------------|----------------------|---------------|--------------------------------------------|------|
|                        |                                           |                      | SPAC56F8.08   | UBA domain protein Mud1                    | 1.19 |
|                        |                                           |                      |               | ER membrane protein complex subunit        |      |
|                        |                                           |                      | SPAC25H1.07   | Emc1 (predicted)                           | 1.17 |
| SPBC19C2.15c           | phosphoprotein phosphatase (predicted)    | 1.62                 | SPAC17A5.19   | sequence orphan                            | 1.17 |
| SPAC1250.02            | sequence orphan                           | 1.58                 |               | methionyl-tRNA formyltransferase Fmt1      |      |
| SPBC405.05             | sequence orphan                           | 1.57                 | SPAC1805.09c  | (predicted)                                | 1.16 |
|                        | RNase P and RNase MRP subunit p30         |                      | SPCC24B10.02c | NAD/NADH kinase (predicted)                | 1.15 |
| SPAC3A12.04c           | (predicted)                               | 1.48                 | SPBC27B12.02  | sequence orphan                            | 1.15 |
|                        | serine/threonine protein kinase Ppk27     |                      |               | Sad1-UNC-like protein involved protein     |      |
| SPBC337.04             | (predicted)                               | 1.46                 | SPBC3E7.09    | folding in the ER (predicted)              | 1.13 |
| SPAC5H10.10            | NADPH dehydrogenase (predicted)           | 1.45                 |               | SIP/FAR complex FHA domain subunit         |      |
| SPAC1250.07            | TFIIIC subunit Sfc7 (predicted)           | 1.45                 | SPBC3H7.13    | Far10/Csc1                                 | 1.13 |
|                        | Sid2-Mob1 kinase complex regulatory       |                      | SPCC162.03    | short chain dehydrogenase (predicted)      | 1.11 |
| SPBC428.13c            | subunit Mob1                              | 1.40                 | SPCC663.06c   | short chain dehydrogenase (predicted)      | 1.09 |
|                        | mitochondrial translation release factor  |                      |               | DNA polymerase alpha accessory factor      |      |
| SPAC589.11             | (predicted)                               | 1.38                 | SPAPB1E7.02c  | Mcl1                                       | 1.08 |
| SPBC1289.14            | adducin (predicted)                       | 1.37                 |               | cell surface glycoprotein%2C adhesion      |      |
| SPBC21C3.06            | sequence orphan                           | 1.31                 | SPAC977.07c   | molecule (predicted)                       | 1.08 |
| SPCC757.02c            | epimarase (predicted)                     | 1.30                 | SPBC3E7.17    | dubious                                    | 1.07 |
|                        | ubiquitin-protein ligase E3 Meu34         |                      | SPAPB17E12.02 | SMN family protein Yip12                   | 1.07 |
| SPAC3A12.03c           | (predicted)                               | 1.29                 | SPBC1703.09   | sequence orphan                            | 1.06 |
|                        | cell surface glycoprotein (predicted)%2C  |                      |               | ATP-dependent RNA helicase Rok1            |      |
| SPCP20C8.04            | DUF1773 family protein 6                  | 1.27                 | SPAC22F3.08c  | (predicted)                                | 1.06 |
|                        | sequence orphan%2C similar to a region of |                      | SPAC823.09c   | threonine aspartase (predicted)            | 1.06 |
|                        | alpha-galactosidase%2C melibiase%2C       |                      |               | ATP-dependent RNA helicase Spb4            |      |
| SPCC757.06             | possible pseudogene                       | 1.24                 | SPBC24C6.02   | (predicted)                                | 1.06 |
|                        | phosphoribosylamidoimidazolesuccinocarb   |                      | SPCC74.01     | SNARE binding protein Sly1 (predicted)     | 1.05 |
|                        | oxamide synthase%2C SAICAR                |                      | SPBC216.03    | conserved fungal protein                   | 1.04 |
| SPBC409.10             | synthetase%2C Ade7                        | 1.21                 | SPAC212.01c   | S. pombe specific DUF999 family protein 2  | 1.03 |
|                        | alpha-1%2C2-mannosyltransferase Omh4      |                      |               | succinate-CoA ligase alpha subunit         |      |
| SPBC1773.08c           | (predicted)                               | 1.21                 | SPAC16E8.17c  | (predicted)                                | 1.02 |
| SPBC428.19c            | U3 snoRNP protein Utp15 (predicted)       | 1.20                 | SPAC869.08    | protein-L-isoaspartate O-methyltransferase | 1.02 |

|               |                                            |      |               |                                            |      |
|---------------|--------------------------------------------|------|---------------|--------------------------------------------|------|
|               | Pcm2 (predicted)                           |      | SPBC21B10.12  | meiotic recombination protein Rec6         | 0.93 |
|               | iron-sulfur cluster assembly ATPase Nbp35  |      | SPBC31F10.12  | RNA-binding protein Tma20 (predicted)      | 0.92 |
| SPAC637.08    | (predicted)                                | 1.01 | SPAC167.06c   | sequence orphan                            | 0.92 |
| SPAC2G11.05c  | BRO1 domain protein Rim20 (predicted)      | 0.99 |               | mitochondrial recombinase Mhr1             |      |
| SPAC1039.03   | esterase/lipase (predicted)                | 0.99 | SPBC18H10.17c | (predicted)                                | 0.91 |
|               | tRNA specific adenosine deaminase subunit  |      | SPCC10H11.02  | DNAJ domain protein Cwf23                  | 0.91 |
| SPAP27G11.04c | Tad3                                       | 0.98 | SPAC20H4.10   | ubiquitin-protein ligase E4 (predicted)    | 0.90 |
| SPBC19G7.08c  | arrestin family protein                    | 0.98 | SPCC1494.08c  | conserved fungal protein                   | 0.90 |
|               | FKBP12 peptidyl-prolyl cis-trans isomerase |      | SPAC3A12.17c  | cysteine synthase Cys12                    | 0.90 |
| SPBC839.17c   | Fkh1                                       | 0.98 |               | mitochondrial ribosomal protein subunit L1 |      |
| SPBC354.14c   | vacuolar protein Vac8 (predicted)          | 0.97 | SPAC1610.02c  | (predicted)                                | 0.90 |
| SPCC584.02    | middle-meiotic transcription factor Cuf2   | 0.97 | SPCC777.12c   | thioredoxin family protein                 | 0.89 |
| SPCC663.14c   | TRP-like ion channel (predicted)           | 0.97 |               | mitochondrial 3'-tRNA processing           |      |
|               | S. pombe specific UPF0321 family protein   |      | SPBC3D6.03c   | endonuclease Trz2                          | 0.88 |
| SPCC569.02c   | 2                                          | 0.96 |               | transcription factor TFIIH complex ERCC-   |      |
| SPBC16E9.16c  | Lsd90 protein                              | 0.96 | SPAC17A5.06   | 3 subunit                                  | 0.88 |
| SPCC191.09c   | glutathione S-transferase Gst1             | 0.96 | SPAC1687.13c  | COP9/signalosome complex subunit Csn5      | 0.88 |
|               | mitochondrial TOM complex subunit          |      | SPBC8E4.05c   | fumarate lyase superfamily                 | 0.88 |
| SPAC6B12.12   | Tom70 (predicted)                          | 0.96 |               | transthyretin superfamily member%2C        |      |
|               | alpha-1%2C2-galactosyltransferase Gmh1     |      | SPBC83.10     | human ER membrane protein complex          |      |
| SPAC5H10.11   | (predicted)                                | 0.96 |               | subunit 7 ortholog                         | 0.88 |
| SPAC3C7.02c   | meiotic eisosome BAR domain protein Pil2   | 0.95 | SPCPJ732.03   | sequence orphan                            | 0.87 |
| SPCC830.10    | nucleoside triphosphatase (predicted)      | 0.95 | SPAC5H10.08c  | pantoate-beta-alanine ligase               | 0.87 |
| SPCC1020.01c  | P-type proton ATPase%2C P3-type Pma2       | 0.95 |               | serine hydroxymethyltransferase Shm2       |      |
| SPAC16A10.08c | sequence orphan                            | 0.95 | SPAC18G6.04c  | (predicted)                                | 0.87 |
|               | 20S proteasome complex subunit beta        |      | SPCC737.08    | midasin (predicted) ;SPCC737.08            | 0.87 |
| SPCC63.12c    | 3%2C Pup3 (predicted)                      | 0.94 |               | proteasome regulatory particle%2C          |      |
|               | peptide-methionine (R)-S-oxide reductase   |      | SPAC6C3.08    | gankyrin (predicted)                       | 0.87 |
| SPBC216.04c   | MsrB                                       | 0.94 | SPBC577.12    | diphthamide synthetase (predicted)         | 0.87 |
| SPAC1486.10   | transcription factor Thi1                  | 0.93 |               | histone H4-like TAF Taf6%2C SAGA           |      |
|               | serine/threonine protein kinase Ppk13      |      | SPCC16C4.18c  | complex subunit                            | 0.87 |
| SPAC3H1.13    | (predicted)                                | 0.93 | SPAC2F3.12c   | thioredoxin fold protein Plp1 (predicted)  | 0.86 |

|               |                                           |      |              |                                            |      |
|---------------|-------------------------------------------|------|--------------|--------------------------------------------|------|
|               | diphthamide biosynthesis protein          |      | SPCC777.11   | sequence orphan                            | 0.82 |
| SPBC17D1.02   | (predicted)                               | 0.86 | SPCC5E4.05c  | mitochondrial serine hydrolase (predicted) | 0.82 |
| SPAPJ696.01c  | retromer complex subunit Vps17            | 0.86 |              | glycerophosphoryl diester                  |      |
| SPBC19C2.14   | Sm snRNP core protein Smd3                | 0.86 | SPAC4D7.02c  | phosphodiesterase (predicted)              | 0.82 |
|               | cytochrome b2 (L-lactate cytochrome-c     |      | SPCC16C4.17  | meiotically upregulated gene Mug123        | 0.82 |
| SPAPB1A11.03  | oxidoreductase) (predicted)               | 0.86 | SPBC30B4.08  | double-strand siRNA ribonuclease Eri1      | 0.82 |
| SPAC1B1.03c   | karyopherin Kap95                         | 0.86 | SPBC16C6.12c | Las1 pre-rRNA processing protein           | 0.82 |
| SPBC1734.15   | RSC complex subunit Rsc4                  | 0.85 | SPAC1782.01  | proteasome complex subunit Ecm29           | 0.82 |
|               | alpha-1%2C2-mannosyltransferase Omh2      |      |              | ARP2/3 actin-organizing complex subunit    |      |
| SPBC16H5.09c  | (predicted)                               | 0.85 | SPAC6F6.10c  | Arc34                                      | 0.81 |
| SPAC25A8.03c  | DUF185 protein%2C mitochondrial           | 0.85 | SPAPB8E5.09  | AAA family ATPase Rvb1                     | 0.81 |
| SPBC23E6.01c  | mRNA processing factor                    | 0.85 |              | mRNA cleavage and polyadenylation          |      |
| SPCC16A11.14  | RSC complex subunit Sfh1                  | 0.85 |              | specificity factor complex subunit Rna14   |      |
| SPBC1271.14   | glutamate N-acetyltransferase (predicted) | 0.85 | SPAC6F12.17  | (predicted)                                | 0.81 |
| SPAC869.03c   | urea transporter (predicted)              | 0.85 | SPCC553.08c  | GTPase Ria1 (predicted)                    | 0.81 |
|               | mitochondrial GIDA family tRNA uridine    |      | SPBC15D4.10c | nuclear rim protein Amo1                   | 0.81 |
|               | 5-carboxymethylaminomethyl modification   |      |              | serine/threonine protein kinase%2C sensor  |      |
| SPBC30B4.06c  | enzyme (predicted)                        | 0.84 | SPAC167.01   | for unfolded proteins in the ER Ire1       | 0.81 |
| SPCC645.08c   | RNA-binding protein Snd1                  | 0.84 | SPBC19C2.13c | cytosolic thiouridylase subunit Ctu2       | 0.80 |
| SPAC959.06c   | conserved fungal protein                  | 0.84 |              | mitochondrial MutS protein Msh1            |      |
| SPBC17A3.06   | phosphoprotein phosphatase (predicted)    | 0.84 | SPAC13F5.01c | (predicted)                                | 0.80 |
| SPBC1271.06c  | sequence orphan                           | 0.84 |              | ABC1 kinase family ubiquinone              |      |
| SPAC13G6.08   | Cdc20/Fizzy subfamily WD repeat protein   | 0.84 | SPBC2D10.18  | biosynthesis protein Abc1/Coq8             | 0.80 |
| SPBC336.11    | GARP complex subunit Vps52 (predicted)    | 0.84 | SPAC15A10.11 | UBR ubiquitin ligase Ubr11                 | 0.80 |
|               | mitochondrial D-lactate                   |      |              | wybutosine biosynthesis protein Tyw1       |      |
| SPBC713.03    | dehydrogenase%2C cytochrome (predicted)   | 0.84 | SPCC1020.08  | (predicted)                                | 0.80 |
|               | Mdm10/Mdm12/Mmm1 complex subunit          |      |              | 20S proteasome complex subunit alpha 1     |      |
| SPBC27B12.01c | Mmm1 (predicted)                          | 0.83 | SPBC646.16   | (predicted)                                | 0.80 |
| SPAC26H5.12   | mitochondrial RNA polymerase Rpo41        | 0.83 |              | KAT5 family histone acetyltransferase      |      |
| SPAC6G9.05    | coenzyme A diphosphatase (predicted)      | 0.83 | SPAC637.12c  | Mst1                                       | 0.79 |
| SPAC23H3.10   | SWI/SNF and RSC complex subunit Ssr2      | 0.83 |              | COPII-coated vesicle component Erv41       |      |
| SPBP35G2.06c  | nucleoporin Nup131                        | 0.83 | SPBC2G5.04c  | (predicted)                                | 0.79 |

|               |                                                                                              |      |               |                                                                                  |      |
|---------------|----------------------------------------------------------------------------------------------|------|---------------|----------------------------------------------------------------------------------|------|
| SPAC1D4.10    | 3'-tRNA processing endonuclease tRNAse<br>Z L2 Trz1 (predicted)                              | 0.79 |               | hydrolase Ubp8                                                                   |      |
| SPBC36.07     | elongator subunit Elp1 (predicted)                                                           | 0.79 | SPBC20F10.08c | RNA polymerase II nuclear import protein<br>Rtp1 (predicted)                     | 0.77 |
| SPBC17A3.05c  | DNAJ/DUF1977 DNAJB12 homolog<br>(predicted)                                                  | 0.79 | SPCC1682.08c  | RNA-binding protein Mcp2                                                         | 0.77 |
| SPBC13G1.02   | mannose-1-phosphate guanyltransferase<br>(predicted)                                         | 0.79 | SPCC777.13    | retromer complex subunit Vps35<br>queuine tRNA-ribosyltransferase<br>(predicted) | 0.77 |
| SPBC21B10.13c | MBF complex negative regulatory<br>component Yox1                                            | 0.79 | SPAC1687.19c  | Tim9-Tim10 complex subunit Tim9<br>(predicted)                                   | 0.77 |
| SPAC14C4.16   | DASH complex subunit Dad3                                                                    | 0.79 | SPCC24B10.05  | translation initiation factor eIF2B epsilon<br>subunit (predicted)               | 0.77 |
| SPAC23D3.13c  | guanyl-nucleotide exchange factor<br>(predicted)                                             | 0.79 | SPAC8C9.15c   | anaphase-promoting complex subunit<br>Apc11                                      | 0.77 |
| SPAC26F1.09   | GTPase activating protein Gyp51<br>(predicted)                                               | 0.79 | SPAC343.03    | Ran GTPase binding protein (predicted)                                           | 0.77 |
| SPAC4G8.09    | mitochondrial leucine-tRNA ligase<br>(predicted)                                             | 0.78 | SPAC31A2.10   | U2 snRNP subunit Sap114                                                          | 0.76 |
| SPBC216.06c   | replication fork protection complex subunit<br>Swi1                                          | 0.78 | SPAC22A12.09c | zinc finger protein%2C truncated                                                 | 0.76 |
| SPBC19G7.10c  | topoisomerase II-associated deadenylation-<br>dependent mRNA-decapping factor<br>(predicted) | 0.78 | SPAC11D3.11c  | BRCT domain protein Brc1                                                         | 0.76 |
| SPAC23D3.02   | DNA replication factor C complex subunit<br>Rfc2                                             | 0.78 | SPBC582.05c   | NatA N-acetyltransferase complex<br>regulatory subunit Naa15 (predicted)         | 0.76 |
| SPCC1620.09c  | transcription factor TFIIF complex alpha<br>subunit Tfg1 (predicted)                         | 0.78 | SPCC338.07c   | chaperonin-containing T-complex delta<br>subunit Cct4                            | 0.75 |
| SPAC823.05c   | SNARE Tlg2 (predicted)                                                                       | 0.78 | SPBC106.06    | condensin complex subunit Cut14                                                  | 0.75 |
| SPBC215.11c   | aldo/keto reductase%2C unknown<br>biological role                                            | 0.78 | SPBP4H10.06c  | P-type ATPase%2C calcium transporting<br>Cta4                                    | 0.75 |
| SPCC31H12.07  | COPII cargo receptor subunit Sec23a<br>(predicted)                                           | 0.78 | SPACUNK4.07c  | NiCoT heavy metal ion transporter Nic1                                           | 0.75 |
| SPAC688.11    | Huntingtin-interacting protein homolog                                                       | 0.77 | SPCC1884.02   | methylenetetrahydrofolate reductase<br>(predicted)                               | 0.75 |
| SPAC13A11.04c | SAGA complex ubiquitin C-terminal                                                            | 0.77 | SPBC1711.04   | CUE domain protein Cue3 (predicted)                                              | 0.75 |
|               |                                                                                              |      | SPCC1906.02c  | spermidine family transporter (predicted)                                        | 0.75 |
|               |                                                                                              |      | SPBC947.06c   | decaprenyl diphosphate synthase subunit<br>Dps1                                  | 0.75 |
|               |                                                                                              |      | SPBPJ4664.01  | proteinase B inhibitor Pbi2 (predicted)                                          | 0.75 |
|               |                                                                                              |      | SPCC338.12    |                                                                                  |      |

|               |                                                                                              |      |              |                                                                             |      |
|---------------|----------------------------------------------------------------------------------------------|------|--------------|-----------------------------------------------------------------------------|------|
| SPBC29A3.01   | copper transporting ATPase Ccc2 (predicted)                                                  | 0.75 | SPAC16E8.06c | RNA-binding protein Nop12 (predicted)                                       | 0.73 |
| SPBP8B7.17c   | phosphomethylpyrimidine kinase (predicted)                                                   | 0.75 | SPAC6F6.12   | autophagy associated protein Atg24 (predicted)                              | 0.73 |
| SPAC683.02c   | zf-CCHC type zinc finger protein                                                             | 0.75 | SPBC24C6.11  | G10 protein                                                                 | 0.73 |
| SPAC1486.01   | manganese superoxide dismutase (predicted)                                                   | 0.75 | SPAC19D5.02c | peroxisomal membrane protein Pex22 (predicted)                              | 0.73 |
| SPCC1494.04c  | prephenate dehydrogenase                                                                     | 0.75 | SPCC965.05c  | uracil DNA N-glycosylase Thp1                                               | 0.73 |
| SPAC821.06    | septin Spn2                                                                                  | 0.75 | SPCC737.09c  | ATP-binding cassette-type vacuolar membrane transporter Hmt1                | 0.72 |
| SPBC36.08c    | Golgi transport complex subunit Cog2 (predicted)                                             | 0.74 | SPBPB21E7.05 | sequence orphan                                                             | 0.72 |
| SPAC12B10.01c | ubiquitin-protein ligase E3 (predicted)                                                      | 0.74 | SPCP1E11.06  | AP-1 adaptor complex gamma subunit Apl4                                     | 0.72 |
| SPAC1805.03c  | tRNA 2'-O-methyltransferase Trm13 (predicted)                                                | 0.74 | SPBC31E1.02c | P-type ATPase%2C calcium transporting Pmr1                                  | 0.72 |
| SPAC17A2.06c  | WD repeat protein Vps8 (predicted)                                                           | 0.74 | SPCC777.02   | transcription factor (predicted)                                            | 0.72 |
| SPCC777.08c   | TORC2 subunit Bit61                                                                          | 0.74 | SPAC15E1.02c | DUF1761 family protein                                                      | 0.72 |
| SPBC577.14c   | ornithine decarboxylase antizyme with +1 programmed ribosomal frameshift Spa1                | 0.74 | SPBC8D2.07c  | transcription factor TFIIC complex subunit Sfc9 (predicted)                 | 0.72 |
| SPAC8F11.03   | MutS protein homolog 3                                                                       | 0.74 | SPBC4.06     | acid phosphatase (predicted)                                                | 0.72 |
| SPCC1620.13   | phosphoglycerate mutase family (predicted)                                                   | 0.74 | SPBC216.05   | ATR checkpoint kinase Rad3                                                  | 0.72 |
| SPBC211.04c   | MCM complex subunit Mcm6                                                                     | 0.74 | SPBC8D2.12c  | mitochondrial translational activator of cytochrome C oxidase I (predicted) | 0.72 |
| SPCC553.04    | WD repeat containing cyclophilin family peptidyl-prolyl cis-trans isomerase Cyp9 (predicted) | 0.74 | SPAC27D7.14c | RNA polymerase II associated Paf1 complex subunit Tpr1                      | 0.72 |
| SPAC11E3.08c  | Smc5-6 complex non-SMC subunit Nse6                                                          | 0.74 | SPCC1494.05c | CSN-associated deubiquitinating enzyme Ubp12                                | 0.72 |
| SPCC16A11.08  | sorting nexin Atg20 (predicted)                                                              | 0.73 | SPAC1556.07  | phosphomannomutase Pmm1                                                     | 0.72 |
| SPAC23A1.19c  | RecQ type DNA helicase Hrq1 (predicted)                                                      | 0.73 | SPBC215.12   | U5 snRNP GTPase subunit Cwf10                                               | 0.72 |
| SPAC1002.12c  | succinate-semialdehyde dehydrogenase                                                         | 0.73 | SPCC126.12   | NGG1 interacting factor 3 family%2C implicated in transcription             | 0.72 |
| SPBC16D10.02  | tRNA (guanine-N2-)-methyltransferase catalytic subunit Trm11 (predicted)                     | 0.73 | SPAC23C11.16 | Polo kinase Plo1                                                            | 0.72 |
| SPCC162.06c   | vacuolar sorting protein Vps60 (predicted)                                                   | 0.73 | SPBC25H2.16c | adaptin (predicted)                                                         | 0.72 |
| SPCC4B3.12    | histone lysine methyltransferase Set9                                                        | 0.73 | SPBC17G9.06c | siderophore-iron biosynthesis protein                                       | 0.71 |

|              |                                                                                     |      |                |                                                     |      |
|--------------|-------------------------------------------------------------------------------------|------|----------------|-----------------------------------------------------|------|
|              | (predicted)                                                                         |      |                | homolog                                             |      |
| SPAC16E8.18c | sequence orphan                                                                     | 0.71 | SPBC29A10.01   | NADPH-cytochrome p450 reductase                     | 0.70 |
| SPAC1952.13  | lipin Ned1                                                                          | 0.71 | SPBC31F10.11c  | complexed with Cdc5 protein Cwf4                    | 0.70 |
| SPAC11D3.13  | ThiJ domain protein                                                                 | 0.71 | SPAC27F1.09c   | U2 snRNP-associated protein Sap155                  | 0.70 |
| SPAC27E2.05  | DNA polymerase delta small subunit Cdc1                                             | 0.71 | SPCC5E4.10c    | human leukocyte receptor 1 ortholog                 | 0.69 |
| SPCC18.16c   | riboflavin kinase Fmn1                                                              | 0.71 | SPCC16C4.04    | sequence orphan                                     | 0.69 |
| SPBC1A4.09   | pseudouridine synthase (predicted)                                                  | 0.71 | SPAPB17E12.04c | COP9/signalosome complex subunit Csn2               | 0.69 |
| SPCC553.03   | AAA family ATPase Pex1 (predicted)                                                  | 0.71 | SPCC1259.11c   | GTPase activating protein Gyp2 (predicted)          | 0.69 |
|              | DNA polymerase epsilon interactor Dpb3-like                                         | 0.71 | SPBC1105.06    | mediator complex subunit Pmc4                       | 0.69 |
| SPAC17G8.03c | WD repeat protein Prp5                                                              | 0.71 | SPBC1A4.10c    | mediator complex subunit Pmc1                       | 0.69 |
| SPBP22H7.07  | small RNA 2'-O-methyltransferase activity (predicted)                               | 0.71 |                | TIM23 translocase complex subunit Tim23 (predicted) | 0.69 |
| SPBC336.05c  | (predicted)                                                                         | 0.71 | SPCC16A11.09c  | ThiJ domain protein                                 | 0.69 |
| SPBC609.03   | WD repeat protein%2C Iqw1                                                           | 0.71 | SPBC947.09     | mRNA processing protein%2C predicted                |      |
| SPAC1006.06  | RhoGEF Rgf2                                                                         | 0.71 | SPBC1734.10c   | ubiquitin ligase (predicted)                        | 0.69 |
| SPCC74.03c   | serine/threonine protein kinase Ssp2                                                | 0.71 |                | tRNA 2'-O-methylase subunit Trm72 (predicted)       | 0.69 |
| SPAC1006.02  | Astra associated protein 1 Asa1                                                     | 0.70 | SPCC1494.07    | (predicted)                                         |      |
| SPCC24B10.20 | short chain dehydrogenase (predicted)                                               | 0.70 |                | mitochondrial manganese ion transporter (predicted) | 0.69 |
|              | translation elongation regulator Gcn1 (predicted)                                   | 0.70 | SPBP23A10.06   | guanyl-nucleotide exchange factor (predicted)       | 0.69 |
| SPAC18G6.05c | (predicted)                                                                         | 0.70 |                | chaperonin-containing T-complex beta subunit Cct2   | 0.69 |
| SPBC106.01   | dual specificity protein kinase Mph1 mitochondrial metalloendopeptidase (predicted) | 0.70 | SPBC211.03c    | serine/threonine protein kinase Ppk22 (predicted)   | 0.69 |
| SPBC119.17   | (predicted)                                                                         | 0.70 | SPAC1D4.04     | RAVE complex subunit Rav2                           | 0.69 |
| SPBC16C6.02c | chorein homolog (predicted)                                                         | 0.70 | SPBC1861.09    | arrestin Aly1 related%2C implicated in endocytosis  | 0.69 |
| SPCC285.16c  | MutS protein homolog                                                                | 0.70 | SPBC3H7.12     | sequence orphan                                     | 0.68 |
| SPCC1020.07  | haloacid dehalogenase-like hydrolase                                                | 0.70 |                | actin-like protein Arp10 (predicted)                | 0.68 |
| SPAC1002.18  | DUF1688 family protein                                                              | 0.70 | SPBC839.02     | AMP binding enzyme (predicted)                      | 0.68 |
| SPAC1F12.04c | conserved fungal protein                                                            | 0.70 | SPCC569.09     | ubiquitin C-terminal hydrolase%2C                   | 0.68 |
|              | SWIM domain containing-Srs2 interacting protein 1                                   | 0.70 | SPBC56F2.03    |                                                     |      |
| SPBC11B10.06 | sequence orphan                                                                     | 0.70 | SPAC22F3.04    |                                                     |      |
| SPAC1071.03c | sequence orphan                                                                     | 0.70 | SPAC22G7.04    |                                                     |      |
| SPBC106.11c  | phospholipase A2%2C PAF family                                                      | 0.70 |                |                                                     |      |



|               |                                                                     |      |               |                                                                          |      |
|---------------|---------------------------------------------------------------------|------|---------------|--------------------------------------------------------------------------|------|
|               | poly(A)-specific ribonuclease complex subunit Pan2 (predicted)      |      | SPAC22H10.03c | karyopherin Kap14                                                        | 0.67 |
| SPAC890.06    | nucleoporin Nup155                                                  | 0.68 | SPAC6G9.10c   | ATP-dependent 5' to 3' DNA/RNA helicase Sen1                             | 0.67 |
|               | CCR4-Not complex subunit Ccr4 (predicted)                           | 0.68 | SPCC188.12    | septin Spn6 (predicted)                                                  | 0.67 |
| SPCC31H12.08c | hexitol dehydrogenase (predicted)                                   | 0.68 | SPBC1198.14c  | fructose-1%2C6-bisphosphatase Fbp1                                       | 0.66 |
| SPBC1773.05c  | exonuclease I Exo1                                                  | 0.68 | SPAC3G6.01    | ATP-dependent DNA helicase Hrp3                                          | 0.66 |
| SPBC29A10.05  | human HID1 ortholog 1                                               | 0.68 |               | ER protein translocation subcomplex subunit Sec63 (predicted)            | 0.66 |
| SPAP27G11.12  | Ran GTP-binding protein (predicted)                                 | 0.68 | SPBC36B7.03   | ribosome biogenesis factor recycling AAA family ATPase (predicted)       | 0.66 |
| SPCC584.03c   | myosin II heavy chain                                               | 0.68 | SPBC56F2.07c  | 1-phosphatidylinositol-3-phosphate 5-kinase Fab1                         | 0.66 |
| SPCC645.05c   | myosin type V                                                       | 0.68 |               | condensin complex non-SMC subunit Cnd1                                   | 0.66 |
| SPBC2D10.14c  | elongation factor 1 alpha related protein (predicted)               | 0.68 | SPBC3E7.01    | mitochondrial PPR repeat protein Ppr8                                    | 0.66 |
| SPBC25B2.01   | Ski complex subunit Rec14                                           | 0.68 | SPBC776.13    | phospholipase D%2C Pld1                                                  | 0.66 |
| SPBC32F12.02  | sequence orphan                                                     | 0.67 | SPAC1289.06c  | short chain dehydrogenase (predicted)                                    | 0.66 |
| SPAC22H10.09  | armadillo repeat containing%2C Zfs1 target number 1                 | 0.67 | SPAC2F7.16c   | telomere length regulator protein Rif1                                   | 0.66 |
| SPCC1494.03   | SWI/SNF complex subunit Snf59                                       | 0.67 | SPAC19A8.06   | mitochondrial pyruvate dehydrogenase (lipoamide) kinase Pkp1 (predicted) | 0.66 |
| SPBC26H8.09c  | C2 domain protein                                                   | 0.67 | SPAC6F6.17    | poly(A) polymerase Cid12                                                 | 0.66 |
| SPAC11E3.02c  | sec14 cytosolic factor family (predicted)                           | 0.67 |               | cortical component Lsb5 (predicted)                                      | 0.66 |
| SPBC365.01    | separase/separin                                                    | 0.67 | SPCC663.12    | BTB/POZ domain protein Btb2                                              | 0.66 |
| SPCC5E4.04    | GRAM domain protein                                                 | 0.67 | SPBC31F10.07  | translation initiation factor eIF2B beta subunit (predicted)             | 0.66 |
| SPBC20F10.07  | conserved eukaryotic ER membrane protein                            | 0.67 | SPBC25B2.06c  | cytoplasmic glutaminyl-tRNA ligase Qrs1 (predicted)                      | 0.66 |
| SPAC56F8.07   | ubiquitin-protein ligase E3 (predicted)                             | 0.67 |               | ubiquitin protein ligase E3 component human N-recognin 7 homolog Mlo2    | 0.65 |
| SPAC16E8.13   | peptidase family M17                                                | 0.67 | SPAC343.14c   | pig-X (predicted)                                                        | 0.65 |
| SPAC13A11.05  | ubiquitin-protein ligase E3 implicated in transcription (predicted) | 0.67 | SPBC342.02    | SNAP-25 homologue%2C t-SNARE component Sec9                              | 0.65 |
| SPBP8B7.23    | aspartyl aminopeptidase Aap1                                        | 0.67 |               | para-hydroxybenzoate--                                                   | 0.65 |
| SPAC4F10.02   | X-Pro dipeptidase (predicted)                                       | 0.67 | SPBC4.05      |                                                                          |      |
| SPBC18A7.01   | polyamine N-acetyltransferase (predicted)                           | 0.67 | SPCC1919.02   |                                                                          |      |
| SPAC9.02c     | chitin synthase regulatory factor-like Cfh1 (predicted)             | 0.67 |               |                                                                          |      |
| SPAC24B11.10c |                                                                     |      | SPBC26H8.02c  |                                                                          |      |
|               |                                                                     |      | SPAC56F8.04c  |                                                                          |      |

|               |                                            |      |               |                                            |      |
|---------------|--------------------------------------------|------|---------------|--------------------------------------------|------|
|               | polyprenyltransferase Ppt1                 |      |               | ortholog                                   |      |
|               | human ATXN10 ortholog%2C implicated        |      |               | UDP-glucose-glycoprotein                   |      |
| SPCC584.14    | in amino acid biosynthesis                 | 0.65 | SPBPJ4664.06  | glucosyltransferase Gpt1                   | 0.64 |
| SPCC306.03c   | condensin complex non-SMC subunit Cnd2     | 0.65 | SPCC1672.10   | kinetochore protein Mis16                  | 0.64 |
|               | thymidylate synthase/ flavoprotein fusion  |      | SPBC30B4.05   | karyopherin Kap109                         | 0.64 |
| SPAC15E1.04   | protein (predicted)                        | 0.65 | SPAC2F3.11    | exopolyphosphatase (predicted)             | 0.64 |
|               | serine/threonine protein kinase%2C meiotic |      |               | potassium channel subunit/aldo-keto        |      |
| SPBC8D2.19    | Mde3                                       | 0.65 | SPCC965.06    | reductase (predicted)                      | 0.64 |
| SPAC637.09    | ribonuclease H70 (predicted)               | 0.65 |               | DNA replication factor C complex subunit   |      |
| SPAC17A2.07c  | sequence orphan                            | 0.65 | SPBC83.14c    | Rfc5 (predicted)                           | 0.64 |
| SPAC22G7.09c  | nucleoporin Nup45                          | 0.65 | SPBC1861.07   | elongin C (predicted)                      | 0.64 |
| SPBC1347.01c  | deoxycytidyl transferase Rev1 (predicted)  | 0.65 | SPCC162.12    | TORC1 subunit Tco89                        | 0.64 |
| SPAC23G3.01   | RNA polymerase II complex subunit Rpb2     | 0.65 |               | Cdc14-related protein phosphatase          |      |
| SPBP23A10.08  | actin-like protein Arp4                    | 0.65 | SPAC1782.09c  | Clp1/Flp1                                  | 0.64 |
|               | mitochondrial lipoic acid synthetase Lip5  |      | SPAC24C9.15c  | septin Spn5                                | 0.64 |
| SPBC8D2.15    | (predicted)                                | 0.65 | SPAP8A3.12c   | tripeptidyl-peptidase II Tpp2              | 0.64 |
|               | ribosome small subunit biogenesis protein  |      | SPAC323.05c   | protein methyltransferase Mtq2 (predicted) | 0.64 |
| SPAC24C9.11   | (predicted)                                | 0.65 | SPAC23D3.06c  | nucleoporin Nup146                         | 0.63 |
|               | mitochondrial ribosomal protein subunit L2 |      | SPBC25D12.03c | MCM complex subunit Mcm7                   | 0.63 |
| SPCC16C4.15   | (predicted)                                | 0.65 | SPBC1604.19c  | TRAPP complex subunit Trs85 (predicted)    | 0.63 |
| SPBC13G1.07   | palmitoyltransferase Swf1 (predicted)      | 0.65 |               | armadillo repeat protein%2C involved in    |      |
| SPBC14F5.09c  | adenylosuccinate lyase Ade8                | 0.65 |               | ribosomal large subunit biogenesis         |      |
|               | mitochondrial ATP-dependent RNA            |      | SPBC1703.03c  | (predicted)                                | 0.63 |
| SPBC691.04    | helicase Mss116 (predicted)                | 0.65 | SPAC12B10.12c | DNA repair protein Rhp41                   | 0.63 |
| SPBC1773.14   | argininosuccinate lyase                    | 0.64 | SPBC18H10.16  | arginine transporter Can1                  | 0.63 |
|               | DNA-directed RNA polymerase III            |      | SPAC1805.05   | serine/threonine protein kinase Cki3       | 0.63 |
| SPBC651.08c   | complex large subunit Rpc1 (predicted)     | 0.64 | SPBC29A3.05   | Swr1 complex subunit Vps71                 | 0.63 |
|               | GET complex ATPase subunit Get3            |      | SPBC947.08c   | histone promoter control protein Hip4      | 0.63 |
| SPAC1142.06   | (predicted)                                | 0.64 | SPBC582.08    | alanine aminotransferase (predicted)       | 0.63 |
| SPCC1450.11c  | serine/threonine protein kinase Cek1       | 0.64 | SPCC1223.01   | ubiquitin-protein ligase E3 (predicted)    | 0.63 |
| SPBC19G7.01c  | MutS protein homolog 2                     | 0.64 |               | ATP-dependent RNA helicase Dbp7            |      |
| SPAC19B12.11c | zinc finger protein%2C human ZNF593        | 0.64 | SPBC21H7.04   | (predicted)                                | 0.63 |

|              |                                                            |      |               |                                               |      |
|--------------|------------------------------------------------------------|------|---------------|-----------------------------------------------|------|
| SPCC777.15   | tRNA dihydrouridine synthase Dus4 (predicted)              | 0.63 | SPBC336.04    | DNA polymerase delta catalytic subunit Cdc6   | 0.62 |
| SPAC6F6.06c  | cell polarity factor Rax2                                  | 0.63 | SPBC36.09     | U2 snRNP-associated protein sap61             | 0.62 |
| SPCP31B10.04 | conserved fungal protein                                   | 0.63 |               | C1-5%2C6%2C7%2C8-tetrahydrofolate             |      |
| SPBPB21E7.09 | L-asparaginase (predicted)                                 | 0.63 | SPBC839.16    | (THF) synthase%2C trifunctional enzyme        | 0.62 |
|              | serine/threonine protein phosphatase (predicted)           | 0.63 | SPAC56F8.03   | translation initiation factor IF2 (predicted) | 0.62 |
| SPBC3F6.01c  | transcription factor Atf31                                 | 0.63 | SPAC31G5.18c  | silencing defective protein Sde2              | 0.62 |
| SPAC22F3.02  | GTPase activating protein (predicted)                      | 0.63 | SPAC637.04    | cargo-transport protein Ypp1 (predicted)      | 0.62 |
| SPBC215.01   | telomerase reverse transcriptase 1 protein                 | 0.63 | SPBC16D10.01c | conserved fungal protein                      | 0.62 |
|              | Trt1                                                       | 0.63 | SPBC16E9.17c  | meiosis-specific cyclin Rem1                  | 0.62 |
| SPBC29A3.14c | wtf element Wtf20                                          | 0.63 | SPCC1259.12c  | Ran GTPase binding protein (predicted)        | 0.62 |
| SPCC1906.04  | signal recognition particle subunit Srp54                  | 0.63 |               | conserved eukaryotic protein%2C               |      |
| SPCC188.06c  | U3 snoRNP-associated protein Lcp5 (predicted)              | 0.63 | SPAC630.10    | DUF3321 family                                | 0.62 |
|              | NatC N-acetyltransferase complex subunit                   |      | SPCC1753.01c  | single-stranded DNA binding protein Ssb2      | 0.62 |
| SPAC18B11.06 | Mak10 (predicted)                                          | 0.63 | SPAC13A11.01c | Rho-type GTPase activating protein Rga8       | 0.62 |
|              | GTP binding protein Gtp1 (predicted)                       | 0.63 | SPCC613.12c   | Rik1-associated factor Raf1                   | 0.62 |
| SPBC1861.03  | kinesin-like protein Klp2                                  | 0.63 | SPCC10H11.01  | ATP-dependent RNA helicase Prp11              | 0.62 |
| SPBC354.01   | sorting receptor for vacuolar proteins%2C                  |      |               | 1-phosphatidylinositol 4-kinase Stt4          |      |
| SPAC664.10   | Vps10                                                      | 0.63 | SPBC577.06c   | (predicted)                                   | 0.62 |
|              | carboxylesterase-lipase family protein                     | 0.63 | SPAC25H1.09   | alpha-amylase homolog Mde5                    | 0.62 |
| SPBC16C6.06  | RNA-binding protein%2C rrm type                            | 0.62 |               | SAGA complex/transcription factor TFIID       |      |
| SPCC417.12   | ribose-phosphate pyrophosphokinase (predicted)             | 0.62 | SPBC21H7.02   | complex subunit Taf10                         | 0.62 |
| SPCC126.11c  | cell surface glycoprotein%2C adhesion molecule (predicted) | 0.62 | SPBC146.11c   | meiotically upregulated gene Mug97            | 0.62 |
|              | transcription elongation factor Spt5                       | 0.62 |               | mitochondrial translation termination factor  |      |
| SPCC1620.06c | alditol NADP+ 1-oxidoreductase activity (predicted)        | 0.62 | SPBC1709.09   | Rrf1                                          | 0.61 |
|              | cytoplasmic cysteine-tRNA ligase Crs1 (predicted)          | 0.62 |               | AP-3 adaptor complex subunit Apm3             |      |
| SPCC188.09c  |                                                            |      | SPBC651.11c   | (predicted)                                   | 0.61 |
| SPAC23C4.19  |                                                            |      |               | U3 snoRNP-associated protein Utp7             |      |
|              |                                                            |      | SPAC959.03c   | (predicted)                                   | 0.61 |
| SPBC8E4.04   |                                                            |      | SPAC343.10    | methylenetetrahydrofolate reductase Met11     | 0.61 |
|              |                                                            |      | SPBC1773.09c  | meiotically upregulated gene Mug184           | 0.61 |
| SPAC29E6.06c |                                                            |      | SPAC1D4.14    | THO complex subunit Tho2 (predicted)          | 0.61 |

|               |                                           |      |               |                                           |      |
|---------------|-------------------------------------------|------|---------------|-------------------------------------------|------|
| SPAPB8E5.07c  | rRNA processing protein Rrp12 (predicted) | 0.61 | SPAC17G6.05c  | BRO1 domain protein Bro1 (predicted)      | 0.60 |
| SPBC902.05c   | isocitrate dehydrogenase (NAD+) subunit 2 | 0.61 | SPAC821.03c   | sequence orphan                           | 0.60 |
| SPBC660.13c   | DNA replication factor A subunit Ssb1     | 0.61 | SPAC30D11.14c | RNA-binding protein (predicted)           | 0.60 |
| SPBC28E12.03  | Rho-type GTPase activating protein Rga4   | 0.61 |               | nuclear cap-binding complex large subunit |      |
|               | phosphoribosylaminoimidazole carboxylase  |      | SPAC6G10.07   | (predicted)                               | 0.60 |
| SPCC1322.13   | Ade6                                      | 0.61 | SPAP7G5.04c   | aminoadipate-semialdehyde dehydrogenase   | 0.60 |
|               | MBF transcription factor complex subunit  |      | SPAC25G10.01  | RNA-binding protein                       | 0.60 |
| SPAC22F3.09c  | Res2                                      | 0.61 |               | sporulation specific 1%2C3-beta-          |      |
| SPBC577.09    | ERCC-8 DNA repair homolog                 | 0.61 | SPBC342.03    | glucanosyltransferase Gas4                | 0.60 |
|               | peroxisomal biogenesis factor 11          |      |               | trehalose-phosphate synthase Tps2         |      |
| SPBC582.09    | (predicted)                               | 0.61 | SPAC3G6.09c   | (predicted)                               | 0.60 |
| SPAPB17E12.03 | ubiquitin-protein ligase E3 (predicted)   | 0.61 | SPAC1F12.09   | pig-S (predicted)                         | 0.60 |
|               | mitochondrial ribosomal protein subunit   |      |               | NADP-specific glutamate dehydrogenase     |      |
| SPCC1795.07   | S37 (predicted)                           | 0.61 | SPCC622.12c   | Gdh1 (predicted)                          | 0.60 |
| SPAC1F8.03c   | siderophore-iron transporter Str3         | 0.61 |               | U6 snRNP-associated protein Lsm5          |      |
|               | Clr6 histone deacetylase complex subunit  |      | SPBC20F10.09  | (predicted)                               | 0.60 |
| SPAC29A4.18   | Prw1                                      | 0.61 |               | MBF transcription factor complex subunit  |      |
| SPCC61.02     | SAGA complex subunit Spt3                 | 0.61 | SPBC336.12c   | Cdc10                                     | 0.60 |
| SPAC4A8.04    | vacuolar serine protease Isp6             | 0.61 | SPCC830.03    | polynucleotide kinase Grc3 (predicted)    | 0.60 |
| SPAC23G3.08c  | ubiquitin C-terminal hydrolase Ubp7       | 0.61 | SPAC607.05    | 19S proteasome regulatory subunit Rpn9    | 0.60 |
| SPCC285.10c   | SPRY domain protein                       | 0.61 | SPBC776.05    | membrane transporter (predicted)          | 0.60 |
| SPAC1805.15c  | HECT-type ubiquitin-protein ligase Pub2   | 0.60 | SPAC1610.01   | splicing factor (unnamed)                 | 0.60 |
| SPBC1683.11c  | isocitrate lyase (predicted)              | 0.60 | SPCC1183.06   | uracil DNA N-glycosylase Ung1             | 0.60 |
|               | ER membrane protein%2C BIG1 family        |      | SPBC16A3.13   | alpha-amylase homolog Aah4                | 0.59 |
| SPCC306.06c   | (predicted)                               | 0.60 |               | iron responsive transcriptional           |      |
|               | GLYK family kinase of unknown             |      | SPAC22G7.01c  | regulator%2C peptidase family (predicted) | 0.59 |
| SPAC630.09c   | specificity (predicted)                   | 0.60 | SPCC895.07    | TOG ortholog Alp14                        | 0.59 |
|               | mannosyltransferase complex subunit Alg1  |      | SPAC6G10.09   | alpha glucosidase I Gls1 (predicted)      | 0.59 |
| SPAC23C4.14   | (predicted)                               | 0.60 |               | prevacuole/endosomal FYVE tethering       |      |
| SPCC132.01c   | nuclear export mediator factor NEMF       | 0.60 | SPAC17G6.08   | component Pep7 (predicted)                | 0.59 |
|               | cyclin CycC%2C Srb mediator subunit       |      | SPCC576.14    | diphthine synthase Dph5 (predicted)       | 0.59 |
| SPBC12D12.06  | Srb11                                     | 0.60 | SPBC887.13c   | 3-oxoacyl-                                | 0.59 |

|              |                                            |      |                |                                                |      |
|--------------|--------------------------------------------|------|----------------|------------------------------------------------|------|
| SPBC16E9.10c | AAA family ATPase Rix7 (predicted)         | 0.59 | SPBC16G5.02c   | ribokinase (predicted)                         | 0.58 |
| SPBC725.04   | oxalyl-CoA decarboxylase (predicted)       | 0.59 |                | DNA replication endonuclease-helicase          |      |
|              | nucleoside-triphosphatase involved in SSU- |      | SPBC16D10.04c  | Dna2                                           | 0.58 |
| SPCC830.11c  | rRNA maturation (predicted)                | 0.59 | SPAC3G9.05     | GTPase activating protein (predicted)          | 0.58 |
| SPAC23D3.03c | GTPase activating protein (predicted)      | 0.59 |                | SAGA complex subunit/TATA-binding              |      |
|              | human thyroid receptor interacting protein |      |                | protein associated factor/transcription factor |      |
|              | homolog%2C transcription coactivator       |      | SPCC5E4.03c    | TFIID complex subunit Taf5                     | 0.58 |
| SPAC1A6.01c  | (predicted)                                | 0.59 | SPAC1006.03c   | RNA elimination defective protein Red1         | 0.58 |
| SPBC1773.06c | alcohol dehydrogenase (predicted)          | 0.59 | SPAC20G4.07c   | C-24(28) sterol reductase Sts1                 | 0.58 |
|              | chaperonin-containing T-complex theta      |      |                | tRNA-splicing endonuclease subunit             |      |
| SPBC337.05c  | subunit Cct8                               | 0.59 | SPAPB17E12.07c | catalytic subunit Sen2 (predicted)             | 0.58 |
| SPBC1289.04c | Boi family protein                         | 0.59 | SPAC1486.02c   | Golgi Dsc E3 ligase complex subunit Dsc2       | 0.58 |
|              | dipeptide transmembrane transporter        |      |                | transcription factor TFIID complex subunit     |      |
| SPBC1773.15  | Dal5h2 (predicted)                         | 0.59 | SPAC23G3.09    | Taf4 (predicted)                               | 0.58 |
| SPAC22F3.10c | glutamate-cysteine ligase Gcs1             | 0.59 | SPBC342.04     | 19S proteasome regulatory subunit Rpn13a       | 0.58 |
| SPAC3A11.10c | dipeptidyl peptidase (predicted)           | 0.59 | SPAC4F8.01     | ESCRT III complex subunit Did4                 | 0.58 |
|              | karyopherin%2C nuclear import receptor     |      |                | non-specific DNA binding protein Spt2          |      |
| SPBC11G11.07 | Mtr10 (predicted)                          | 0.59 | SPCC1393.02c   | (predicted)                                    | 0.58 |
| SPBC27.02c   | DASH complex subunit Ask1                  | 0.59 | SPBC23G7.13c   | urea transporter (predicted)                   | 0.58 |
| SPBC1709.02c | cytoplasmic valine-tRNA ligase Vrs1/Vas1   | 0.59 | SPBC16C6.09    | protein O-mannosyltransferase Ogm4             | 0.58 |
|              | Sim4 and Mal2 associated (4 and 2          |      |                | GPI-mannosyltransferase II complex             |      |
| SPAC1783.03  | associated) protein 2                      | 0.59 | SPAC167.09     | subunit Pga1 (predicted)                       | 0.58 |
| SPAC6G9.15c  | sequence orphan                            | 0.59 | SPAC1565.05    | sequence orphan                                | 0.58 |
| SPAC328.06   | ubiquitin C-terminal hydrolase Ubp2        | 0.59 |                | serine/threonine protein kinase Ppk14          |      |
|              | NADPH quinone oxidoreductase/ARE-          |      | SPAC4G8.05     | (predicted)                                    | 0.58 |
| SPCC1442.16c | binding protein (predicted)                | 0.59 |                | CCR4-Not complex subunit Mot2                  |      |
|              | ubiquitin conjugating enzyme Ubc14         |      | SPAC16C9.04c   | (predicted)                                    | 0.58 |
| SPAC1250.03  | (predicted)                                | 0.59 | SPBC8D2.16c    | DUF171 family protein                          | 0.58 |
| SPCC1020.12c | xap-5-like protein                         | 0.59 | SPBC1711.17    | ATP-dependent RNA helicase Prp16               | 0.58 |
|              | cAMP-dependent protein kinase catalytic    |      |                | RNA polymerase I core factor complex           |      |
| SPBC106.10   | subunit Pka1                               | 0.59 | SPBC336.09c    | subunit Rrn7                                   | 0.58 |
| SPAC4G8.06c  | tRNA methyltransferase Trm12 (predicted)   | 0.59 | SPAC1A6.05c    | triacylglycerol lipase ptl3                    | 0.58 |

|               |                                             |      |               |                                             |      |
|---------------|---------------------------------------------|------|---------------|---------------------------------------------|------|
| SPAC2C4.07c   | 3'-5'-exoribonuclease activity Dis3L2       | 0.57 | SPACUNK4.10   | glyoxylate reductase (predicted)            | 0.57 |
| SPBC713.02c   | ubiquitin C-terminal hydrolase Ubp15        | 0.57 |               | queuine tRNA-ribosyltransferase             |      |
| SPBPB21E7.10  | sequence orphan                             | 0.57 | SPAC2F3.13c   | (predicted)                                 | 0.57 |
|               | actin cortical patch component Aip1         |      | SPBC9B6.10    | Hsp90 co-chaperone Cdc37                    | 0.56 |
| SPAC9G1.05    | (predicted)                                 | 0.57 | SPAC26F1.12c  | conserved eukaryotic protein                | 0.56 |
|               | NuA4 histone acetyltransferase complex      |      | SPAC2G11.03c  | vacuolar sorting protein Vps45              | 0.56 |
| SPCC1795.08c  | subunit Vid21                               | 0.57 |               | ER to Golgi tethering factor Uso1           |      |
| SPBC6B1.06c   | ubiquitin C-terminal hydrolase Ubp14        | 0.57 | SPAC29E6.03c  | (predicted)                                 | 0.56 |
| SPAC22H10.12c | GDP dissociation inhibitor Gdi1 (predicted) | 0.57 | SPAC2C4.15c   | UBX domain protein Ubx2                     | 0.56 |
| SPAC23H3.11c  | glucosidase (predicted)                     | 0.57 |               | RNA polymerase II transcription elongation  |      |
| SPCP1E11.02   | Ark1/Prk1 family protein kinase Ppk38       | 0.57 | SPBP23A10.14c | factor SpELL                                | 0.56 |
| SPAC343.11c   | multi-copy suppressor of Chk1               | 0.57 | SPAC1610.04   | meiotically upregulated gene Mug99          | 0.56 |
| SPAC343.16    | homoaconitate hydratase Lys2                | 0.57 | SPBC216.07c   | phosphatidylinositol kinase Tor2            | 0.56 |
| SPAC12G12.12  | NST UDP-galactose transporter (predicted)   | 0.57 | SPAC17G6.12   | cullin 1                                    | 0.56 |
|               | U4/U6 x U5 tri-snRNP complex subunit        |      |               | elongator complex associated protein Kti2   |      |
| SPAC29E6.02   | Prp3                                        | 0.57 | SPAC30.02c    | (predicted)                                 | 0.56 |
| SPAC821.13c   | P-type ATPase (predicted)                   | 0.57 |               | centrosomal transforming acidic coiled-coil |      |
|               | 4-amino-5-hydroxymethyl-2-                  |      | SPAC890.02c   | (TACC) protein ortholog Alp7                | 0.56 |
| SPCC1223.02   | methylpyrimidine phosphate synthase Nmt1    | 0.57 | SPCC1322.12c  | serine/threonine protein kinase Bub1        | 0.56 |
| SPAC1006.01   | vacuolar serine protease Psp3 (predicted)   | 0.57 | SPAC20G4.08   | mRNA decapping scaffolding protein          | 0.56 |
| SPBC1709.01   | chitin synthase homolog Chs2                | 0.57 | SPCC663.03    | leptomycin efflux transporter Pmd1          | 0.56 |
| SPAC17A5.11   | endonuclease Rec12                          | 0.57 |               | elongator complex%2C histone                |      |
| SPAC323.04    | mitochondrial ATPase (predicted)            | 0.57 | SPAC29A4.20   | acetyltransferase subunit Elp3 (predicted)  | 0.56 |
| SPBC428.17c   | Wings apart-like homolog Wpl1               | 0.57 | SPCC16A11.17  | MCM complex subunit Mcm4/Cdc21              | 0.56 |
|               | DNA-directed RNA polymerase I%2C II         |      | SPAC13G6.12c  | chitin synthase I                           | 0.56 |
| SPCC1020.04c  | and III subunit Rpb6                        | 0.57 | SPBC15C4.06c  | ubiquitin-protein ligase E3 (predicted)     | 0.56 |
| SPBC3D6.04c   | mitotic spindle checkpoint protein Mad1     | 0.57 | SPBC2G5.02c   | CK2 family regulatory subunit (predicted)   | 0.56 |
|               | mitochondrial inner membrane protein        |      | SPCC18B5.07c  | nucleoporin Nup61                           | 0.56 |
| SPAC3H1.04c   | Mdm31 (predicted)                           | 0.57 | SPCC895.05    | formin For3                                 | 0.56 |
| SPBC725.09c   | BAR adaptor protein Hob3                    | 0.57 |               | transcription factor%2C zf-fungal binuclear |      |
| SPBC9B6.09c   | mitochondrial peptide-transporting ATPase   | 0.57 | SPBC16G5.16   | cluster type (predicted)                    | 0.56 |
| SPAC4F8.12c   | U5 snRNP complex subunit Spp42              | 0.57 | SPBC24C6.10c  | WISH/DIP/SPIN90 ortholog Dip1               | 0.56 |

|               |                                                                                        |      |               |                                                              |      |
|---------------|----------------------------------------------------------------------------------------|------|---------------|--------------------------------------------------------------|------|
| SPBC3D6.13c   | ER associated protein disulfide isomerase Pdi2                                         | 0.56 | SPBC428.01c   | nucleoporin Nup107                                           | 0.55 |
| SPBC646.17c   | meiotic dynein intermediate chain Dic1                                                 | 0.56 | SPAPB1E7.05   | glycerophosphoryl diester phosphodiesterase Gde1 (predicted) | 0.55 |
| SPAP27G11.03  | D123 family protein                                                                    | 0.56 | SPBC342.06c   | RTT109 family histone lysine acetyltransferase               | 0.55 |
| SPCC70.07c    | thymidylate kinase Tmp1                                                                | 0.56 | SPCC338.04    | caffeine induced death protein Cid2                          | 0.55 |
| SPBC1734.09   | NST UDP-N-acetylglucosamine transporter (predicted)                                    | 0.56 | SPCC895.03c   | SUA5/yciO/yrdC family protein Sua5 (predicted)               | 0.55 |
| SPAPB21F2.02  | Dopey family protein (predicted)                                                       | 0.56 | SPAC14C4.07   | membrane transporter (predicted)                             | 0.55 |
| SPCC290.03c   | nucleoporin Nup186                                                                     | 0.56 | SPBC18H10.06c | Set1C complex subunit Swd2.1                                 | 0.55 |
| SPAC4A8.02c   | conserved protein%2C UPF0047 family iron-sulfur cluster biogenesis protein (predicted) | 0.55 | SPAC644.16    | RNA-binding protein (predicted)                              | 0.55 |
| SPAC21E11.07  | RNA-binding protein Mde7                                                               | 0.55 | SPBC3E7.07c   | DUF757 family protein                                        | 0.55 |
| SPCC320.07c   | alpha-1%2C6- mannanase (predicted)                                                     | 0.55 | SPCC584.05    | SNARE binding protein Sec1 (predicted)                       | 0.55 |
| SPAC3C7.05c   | pseudokinase Tea5                                                                      | 0.55 | SPBC11B10.04c | mitochondrial ribosomal protein subunit S28 (predicted)      | 0.55 |
| SPAC12B10.14c | Golgi transport complex subunit Cog8 (predicted)                                       | 0.55 | SPAC1565.02c  | Rho-type GTPase activating protein (predicted)               | 0.54 |
| SPBC11B10.03  | mitochondrial carboxylate transporter (predicted)                                      | 0.55 | SPAC6F12.02   | transcription factor Rst2                                    | 0.54 |
| SPBC1271.11   | Noc complex subunit Noc2 family (predicted)                                            | 0.55 | SPCC553.06    | oligosaccharyltransferase delta subunit Swp1 (predicted)     | 0.54 |
| SPAC1142.04   | ubiquitin-protein ligase E3 Brl2                                                       | 0.55 | SPBPB21E7.07  | enhancer of RNA-mediated gene silencing                      | 0.54 |
| SPCC970.10c   | nonsense-mediated decay protein Upf2                                                   | 0.55 | SPBC11G11.04  | TRAPP complex subunit Trs20 (predicted)                      | 0.54 |
| SPAC19A8.08   | mediator complex subunit Med7                                                          | 0.55 | SPBC106.07c   | N alpha-acetylation related protein Nat2 (predicted)         | 0.54 |
| SPBC14F5.08   | nucleoporin nup211                                                                     | 0.55 | SPAC9E9.06c   | threonine synthase (predicted)                               | 0.54 |
| SPCC162.08c   | transcription factor TFIIH complex subunit Tfb4                                        | 0.55 | SPCC338.13    | Golgi transport complex subunit Cog4 (predicted)             | 0.54 |
| SPBC30B4.07c  | phenylalanine-tRNA ligase beta subunit Frs1 (predicted)                                | 0.55 | SPAC22E12.03c | ThiJ domain protein                                          | 0.54 |
| SPAC23A1.12c  | NAD/NADH kinase (predicted)                                                            | 0.55 | SPCC132.04c   | NAD-dependent glutamate dehydrogenase Gdh2 (predicted)       | 0.54 |
| SPAC1B1.02c   | THO complex subunit (predicted)                                                        | 0.55 | SPBC1215.01   | SURF-family protein Shy1 (predicted)                         | 0.54 |
| SPBC106.12c   | meiotically upregulated gene Mug174                                                    | 0.55 | SPCC1840.03   | karyopherin Sal3                                             | 0.54 |

|               |                                                                                                              |      |               |                                                                                                       |      |
|---------------|--------------------------------------------------------------------------------------------------------------|------|---------------|-------------------------------------------------------------------------------------------------------|------|
| SPAC1142.03c  | Swi5 complex subunit Swi2<br>hexaprenyldihydroxybenzoate<br>methyltransferase%2C Coq3 variant<br>(predicted) | 0.54 |               | quality control (predicted)<br>TRAPP complex subunit Trs120<br>(predicted)                            | 0.53 |
| SPBC1347.09   | ribosome biogenesis protein Urb2<br>(predicted)                                                              | 0.54 | SPAC6G10.05c  | NuA4 complex phosphatidylinositol<br>pseudokinase complex subunit Tra2<br>;SPAC1F5.11c                | 0.53 |
| SPAC2G11.02   | pig-A%2C phosphatidylinositol N-<br>acetylglucosaminyltransferase subunit Gpi3<br>(predicted)                | 0.54 | SPAC1F5.11c   | protoheme IX farnesyltransferase<br>(predicted)                                                       | 0.53 |
| SPBC3D6.07    | alpha-actinin                                                                                                | 0.54 | SPBC365.02c   | origin recognition complex subunit Orp3                                                               | 0.53 |
| SPAC15A10.08  | retrotransposable element/transposon Tf2-<br>type                                                            | 0.54 | SPAC3H1.01c   | meiotically upregulated gene Mug46                                                                    | 0.53 |
| SPAC2E1P3.03c | anaphase-promoting complex subunit Apc3                                                                      | 0.54 | SPCC1235.12c  | mRNP complex (predicted)                                                                              | 0.53 |
| SPAC17C9.01c  | GINS complex subunit Sld5                                                                                    | 0.54 | SPAC458.02c   | SNF2 family helicase Ino80                                                                            | 0.53 |
| SPBP4H10.21c  | U2 snRNP-associated protein Lea1<br>(predicted)                                                              | 0.54 | SPAC29B12.01  | tRNA 2'-phosphotransferase Tpt1<br>(predicted)                                                        | 0.53 |
| SPBC1861.08c  | transcription factor TFIID complex subunit<br>Taf111                                                         | 0.54 | SPAC2C4.12c   | DNA replication ATPase (predicted)                                                                    | 0.53 |
| SPAC2G11.14   | sequence orphan                                                                                              | 0.54 | SPAC26H5.02c  | TREX complex subunit Tex1 (predicted)                                                                 | 0.53 |
| SPAC630.07c   | inositol polyphosphate phosphatase<br>(predicted)                                                            | 0.54 | SPCC18B5.10c  | HOPS/CORVET complex subunit%2C<br>ubiquitin-protein ligase E3 (predicted)                             | 0.53 |
| SPBC19F5.03   | 4-nitrophenylphosphatase                                                                                     | 0.54 | SPAC513.05    | alpha-mannosidase (predicted)                                                                         | 0.53 |
| SPBC15D4.15   | protein phosphatase regulatory subunit<br>Glc9 (predicted)                                                   | 0.54 | SPAC20G8.09c  | ribosome biogenesis ATPase (predicted)<br>shuttle craft like transcriptional regulator<br>(predicted) | 0.53 |
| SPAC17A5.09c  | nucleoporin Nic96 homolog                                                                                    | 0.54 | SPCC18.03     | RNA export factor Rsm1                                                                                | 0.53 |
| SPCC1620.11   | ER-localized ubiquitin ligase Doa10<br>(predicted)                                                           | 0.54 | SPCC1753.05   | DinB translesion DNA repair<br>polymerase%2C pol kappa                                                | 0.53 |
| SPBC14F5.07   | TATA-binding protein associated factor<br>Taf2 (predicted)                                                   | 0.54 | SPCC553.07c   | histone lysine methyltransferase Set2                                                                 | 0.53 |
| SPAC3A12.05c  | SMR domain protein%2C possibly<br>involved in DNA repair                                                     | 0.54 | SPAC29B12.02c | sporulation specific PIL domain protein<br>Meu14                                                      | 0.53 |
| SPCC1235.03   | RNA endoribonuclease involved in mRNP                                                                        | 0.54 | SPBC1347.03   | U3 snoRNP-associated protein Utp21<br>(predicted)                                                     | 0.53 |
| SPCC24B10.15  |                                                                                                              | 0.54 | SPCC1672.07   | mitochondrial ATP-dependent RNA<br>helicase Rpm2                                                      | 0.53 |
|               |                                                                                                              |      | SPAC637.11    |                                                                                                       |      |



|               |                                             |      |              |                                           |      |
|---------------|---------------------------------------------|------|--------------|-------------------------------------------|------|
| SPBC23E6.03c  | protein N-terminal amidase Nta1 (predicted) | 0.53 | SPBC800.03   | MBOAT (predicted)                         |      |
| SPCC188.03    | condensin complex non-SMC subunit Cnd3      | 0.53 | SPAC22F3.03c | histone deacetylase (class II) Clr3       | 0.52 |
| SPBC1773.02c  | thioredoxin peroxidase (predicted)          | 0.53 |              | ATP-dependent DNA helicase Rdh54          | 0.52 |
| SPBC27B12.11c | transcription factor Pho7                   | 0.53 | SPBC19F8.02  | nuclear distribution protein NUDC         |      |
| SPBC2A9.03    | WD40/YVTN repeat-like                       | 0.53 |              | homolog                                   | 0.52 |
| SPBC354.02c   | translocon alpha subunit Sec61              | 0.53 | SPCC1281.05  | RSC complex subunit Rsc7                  | 0.52 |
| SPBP22H7.02c  | RNA-binding protein Mrd1 (predicted)        | 0.53 |              | TPR repeat protein Oca3/ ER membrane      |      |
| SPCC1450.14c  | ER protein folding oxidoreductin Ero1b      | 0.53 | SPBC15C4.01c | protein complex Ecm2 (predicted)          | 0.52 |
| SPCC23B6.03c  | ATM checkpoint kinase                       | 0.53 |              | Spo4-Spo6 kinase complex regulatory       |      |
| SPAPB17E12.08 | N-glycosylation protein (predicted)         | 0.53 | SPBC1778.04  | subunit Spo6                              | 0.52 |
|               | signal recognition particle subunit Srp72   |      | SPBC16D10.03 | metallopeptidase Pgp2                     | 0.52 |
| SPCC320.10    | (predicted)                                 | 0.53 | SPCC188.13c  | dicer                                     | 0.52 |
| SPBC1604.12   | sequence orphan                             | 0.53 | SPCC1259.13  | Chk1 protein kinase                       | 0.52 |
|               | WD repeat protein involved in               |      | SPCC74.06    | histidine kinase Mak3                     | 0.52 |
| SPBC27B12.05  | transcriptional regulation (predicted)      | 0.53 | SPAC17G8.01c | tRNA ligase Trl1 (predicted)              | 0.52 |
| SPBC31F10.13c | hira protein%2C histone chaperone Hip1      | 0.53 |              | WD repeat protein%2C Raptor homolog       |      |
| SPBC31E1.01c  | autophagy associated protein Atg2           | 0.53 | SPAC57A7.11  | Mip1                                      | 0.52 |
| SPBC3H7.06c   | F-box protein Pof9                          | 0.53 |              | HSP chaperone complex subunit Cns1        |      |
|               | tRNA specific adenosine deaminase subunit   |      | SPAC17A2.04c | (predicted)                               | 0.52 |
| SPBC16D10.10  | Tad2                                        | 0.52 | SPAP7G5.02c  | GMP synthase                              | 0.52 |
|               | glycine cleavage complex subunit P          |      |              | Sec7 domain protein%2C ARF GEF            |      |
| SPAC13G6.06c  | (predicted)                                 | 0.52 | SPAC4D7.01c  | (predicted)                               | 0.52 |
|               | CCAAT-binding factor complex subunit        |      |              | sulfite reductase NADPH flavoprotein      |      |
| SPAC23C11.08  | Php3                                        | 0.52 | SPCC584.01c  | subunit (predicted)                       | 0.52 |
| SPAC869.09    | conserved fungal protein                    | 0.52 | SPAC1F5.06   | ER heat shock protein Lsh1 (predicted)    | 0.52 |
| SPBC27B12.09c | mitochondrial FAD transporter (predicted)   | 0.52 | SPAC1610.03c | poly(A) binding protein Crp79             | 0.52 |
| SPAC15E1.06   | retromer complex subunit Vps29              | 0.52 | SPCC550.02c  | RNA-binding protein Cwf5                  | 0.52 |
|               | DNA-directed RNA polymerase III             |      | SPBPB2B2.09c | 2-dehydropantoate 2-reductase (predicted) | 0.52 |
| SPAC4G9.08c   | complex subunit Rpc2                        | 0.52 | SPBC25B2.11  | F-box protein Pof2                        | 0.51 |
| SPBC6B1.10    | splicing factor Prp17                       | 0.52 | SPBC902.04   | RNA-binding protein                       | 0.51 |
| SPBC16A3.10   | membrane bound O-acyltransferase%2C         | 0.52 | SPBC13E7.01  | splicing factor Cwf22                     | 0.51 |
|               |                                             |      | SPBP35G2.05c | serine/threonine protein kinase Cki2      | 0.51 |

|               |                                           |      |               |                                           |      |
|---------------|-------------------------------------------|------|---------------|-------------------------------------------|------|
| SPAC6G10.02c  | cell end marker Tea3                      | 0.51 |               | SMR and DUF1771 domain protein            |      |
| SPAC4A8.05c   | myosin II heavy chain Myo3                | 0.51 | SPAC11H11.03c | (predicted)                               | 0.51 |
| SPBC11C11.11c | ATP helicase Irc3 (predicted)             | 0.51 | SPBC1539.03c  | argininosuccinate lyase (predicted)       | 0.51 |
|               | phosphoribosyl-AMP                        |      | SPAC18B11.03c | N-acetyltransferase (predicted)           | 0.50 |
|               | cyclohydrolase/phosphoribosyl- ATP        |      |               | triglyceride lipase-cholesterol esterase  |      |
| SPBC29A3.02c  | pyrophosphohydrolase His7                 | 0.51 | SPBC14C8.15   | (predicted)                               | 0.50 |
| SPAC6F12.14   | anaphase-promoting complex subunit Apc8   | 0.51 | SPAC23H4.18c  | RING-box protein 1                        | 0.50 |
| SPAC824.02    | GPI inositol deacylase Bst1 (predicted)   | 0.51 | SPCC645.07    | RhoGEF for Rho1%2C Rgf1                   | 0.50 |
| SPBC29A10.07  | nucleoporin Pom152                        | 0.51 | SPAPB1A10.10c | GTPase Ypt71                              | 0.50 |
|               | glutamate-1-semialdehyde 2%2C1-           |      | SPAC1F5.05c   | conserved fungal protein                  | 0.50 |
| SPCC417.11c   | aminomutase (predicted)                   | 0.51 |               | ATP-dependent RNA/DNA helicase            |      |
|               | mitochondrial threonine-tRNA ligase       |      | SPBC15C4.05   | (predicted)                               | 0.50 |
| SPAC24C9.09   | (predicted)                               | 0.51 |               | autophagy associated protein kinase       |      |
|               | vacuolar import and degradation protein   |      | SPAC10F6.11c  | activator Atg17                           | 0.50 |
| SPAC26H5.04   | Vid28 (predicted)                         | 0.51 | SPAC22E12.14c | serine/threonine protein kinase Sck2      | 0.50 |
| SPAC513.06c   | dihydrodiol dehydrogenase (predicted)     | 0.51 | SPAP27G11.05c | HOPS complex subunit Vps41 (predicted)    | 0.50 |
|               | alpha-1%2C2-mannosyltransferase Omh3      |      |               | mitochondrial tRNA(Ile)-lysidine          |      |
| SPCC777.07    | (predicted)                               | 0.51 | SPAC12B10.08c | synthetase family (predicted)             | 0.50 |
| SPBC31F10.14c | HIRA interacting protein Hip3             | 0.51 | SPCC1919.11   | BAR adaptor protein                       | 0.50 |
| SPBC215.15    | COPII-coated vesicle component Sec13      | 0.51 |               | BAG family molecular chaperone regulator  |      |
|               | mitochondrial inner membrane protein Sls1 |      | SPBC530.03c   | Bag102 (predicted)                        | 0.50 |
| SPAP8A3.14c   | (predicted)                               | 0.51 | SPAC1687.07   | conserved fungal protein                  | 0.50 |
| SPBC36.05c    | histone deacetylase (class I) Clr6        | 0.51 | SPAC328.01c   | karyopherin (predicted)                   | 0.50 |
|               | 1-acylglycerol-3-phosphate O-             |      | SPAC22A12.07c | protein O-mannosyltransferase Ogm1        | 0.50 |
| SPAC1851.02   | acyltransferase Slc1 (predicted)          | 0.51 |               | 19S proteasome regulatory subunit Rpn8    |      |
|               | Usp (universal stress protein) family     |      | SPCC1682.10   | (predicted)                               | 0.50 |
|               | protein%2C implicated in meiotic          |      |               | cytoplasmic proline-tRNA ligase Prs1      |      |
| SPAC167.05    | chromosome segregation                    | 0.51 | SPBC19C7.06   | (predicted)                               | 0.50 |
| SPBC8D2.05c   | spindle pole body protein Sfi1            | 0.51 | SPBC16E9.02c  | CUE domain protein                        | 0.50 |
| SPCC757.03c   | ThiJ domain protein                       | 0.51 | SPBC1348.07   | S. pombe specific DUF999 protein family 6 | 0.50 |
| SPBC1604.02c  | mitochondrial PPR repeat protein Ppr1     | 0.51 | SPAC31G5.04   | homocitrate dehydrogenase Lys12           | 0.50 |
| SPBC3F6.05    | Rho-type GTPase activating protein Rga1   | 0.51 | SPAC6G9.14    | RNA-binding protein (predicted)           | 0.50 |

|                        |                                                                                     |                  |              |                                                                                    |      |
|------------------------|-------------------------------------------------------------------------------------|------------------|--------------|------------------------------------------------------------------------------------|------|
| SPBC3H7.01             | GDP/GTP exchange factor%2C WD repeat protein Spo14                                  | 0.50             | SPAC2G11.05c | BRO1 domain protein Rim20 (predicted)                                              | 1.20 |
| SPBC776.16             | sequence orphan                                                                     | 0.50             | SPBP16F5.03c | SAGA complex phosphatidylinositol pseudokinase Tra1                                | 1.19 |
| SPCC1494.06c           | ATP-dependent RNA helicase Dbp9 (predicted)                                         | 0.50             | SPBC12D12.06 | cyclin CycC%2C Srb mediator subunit Srb11                                          | 1.19 |
| SPCC962.01             | C2 domain protein                                                                   | 0.50             | SPAC23G3.02c | ferrichrome synthetase Sib1                                                        | 1.17 |
| SPBC887.09c            | leucine-rich repeat protein Lrp1                                                    | 0.50             | SPCC23B6.03c | ATM checkpoint kinase                                                              | 1.16 |
| SPBC1734.16c           | SIN3 family co-repressor Pst3                                                       | 0.50             | SPBC27B12.05 | WD repeat protein involved in transcriptional regulation (predicted)               | 1.15 |
| SPAC1556.04c           | cytidine deaminase Ccd1 (predicted)                                                 | 0.50             | SPBC1773.06c | alcohol dehydrogenase (predicted)                                                  | 1.15 |
| SPBC19C2.10            | BAR adaptor protein                                                                 | 0.50             | SPAC3C7.05c  | alpha-1%2C6- mannanase (predicted)                                                 | 1.15 |
| SPBC1306.01c           | mitochondrial translation elongation factor G (predicted)                           | 0.50             | SPCC417.12   | carboxylesterase-lipase family protein mitochondrial MutS protein Msh1 (predicted) | 1.11 |
| <b>Systematic name</b> | <b>Description</b>                                                                  | <b>H4K20 me3</b> | SPAC13F5.01c | Sec7 domain protein%2C ARF GEF (predicted)                                         | 1.11 |
|                        | cytochrome c oxidase assembly protein Cox1101/ mitochondrial ribosomal protein      |                  | SPAC4D7.01c  | Ski complex RNA helicase Ski2 (predicted)                                          | 1.10 |
| SPAC1420.04c           | Rsm22 fusion protein                                                                | 2.46             | SPCC550.03c  | histone lysine methyltransferase Set9                                              | 1.10 |
| SPAC977.01             | S. pombe specific 5Tm protein family SEL1 repeat protein%2C unknown biological role | 2.37             | SPCC4B3.12   | RNA-silencing factor Ers1                                                          | 1.10 |
| SPAC1B3.10c            | Ran GTPase binding protein (predicted)                                              | 1.50             | SPAC22F3.04  | AMP binding enzyme (predicted)                                                     | 1.08 |
| SPAC31A2.10            | epimarase (predicted)                                                               | 1.41             | SPBC21.07c   | serine/threonine protein kinase Ppk24                                              | 1.08 |
| SPCC757.02c            | glucosamine-phosphate N-acetyltransferase (predicted)                               | 1.33             | SPCC1259.12c | Ran GTPase binding protein (predicted)                                             | 1.07 |
| SPAC16E8.03            | myosin type V                                                                       | 1.30             | SPCC757.07c  | catalase                                                                           | 1.06 |
| SPBC2D10.14c           | cell cycle transcriptional repressor Whi5 (predicted)                               | 1.30             | SPBC1773.09c | meiotically upregulated gene Mug184                                                | 1.05 |
| SPBC800.02             | phospholipase (predicted)                                                           | 1.29             | SPBC31E1.01c | autophagy associated protein Atg2                                                  | 1.05 |
| SPBC1348.10c           | mRNA processing factor                                                              | 1.28             | SPCC645.11c  | meiotically upregulated gene Mug117                                                | 1.04 |
| SPBC23E6.01c           | Lsd90 protein                                                                       | 1.25             | SPBC19C2.13c | cytosolic thiouridylase subunit Ctu2                                               | 1.04 |
| SPBC16E9.16c           | thioredoxin fold protein Plp1 (predicted)                                           | 1.22             | SPAC1F5.11c  | NuA4 complex phosphatidylinositol pseudokinase complex subunit Tra2                | 1.04 |
| SPAC2F3.12c            |                                                                                     | 1.21             | SPCP1E11.02  | ;SPAC1F5.11c                                                                       | 1.04 |
|                        |                                                                                     |                  | SPBC577.07   | Ark1/Prk1 family protein kinase Ppk38                                              | 1.04 |
|                        |                                                                                     |                  |              | ubiquitin C-terminal hydrolase Ubp10                                               | 1.04 |

|               |                                            |      |              |                                            |      |
|---------------|--------------------------------------------|------|--------------|--------------------------------------------|------|
|               | (predicted)                                |      |              | ribosome biogenesis protein Urb1           |      |
| SPBC21C3.01c  | chorein homolog (predicted)                | 1.03 | SPCC14G10.02 | (predicted)                                | 0.94 |
| SPCC16A11.04  | sorting nexin Snx12 (predicted)            | 1.02 | SPCC1884.02  | NiCoT heavy metal ion transporter Nic1     | 0.94 |
| SPBP35G2.06c  | nucleoporin Nup131                         | 1.02 | SPAC1039.06  | alanine racemase (predicted)               | 0.93 |
| SPBC685.03    | sequence orphan                            | 1.02 | SPAC16E8.09  | RhoGEF Scd1                                | 0.93 |
| SPBC16C6.02c  | chorein homolog (predicted)                | 1.01 |              | HOPS/CORVET complex subunit Vps16          |      |
| SPAC3G9.11c   | pyruvate decarboxylase (predicted)         | 1.00 | SPAC824.05   | (predicted)                                | 0.93 |
|               | cyclin-dependent protein kinase/CDK-       |      | SPAC1527.01  | alpha-1%2C3-glucan synthase Mok11          | 0.92 |
|               | activating kinase Mcs6                     | 1.00 |              | 26S proteasome non-ATPase regulatory       |      |
| SPBC19F8.07   | SIP/FAR complex subunit%2C Far11/Csc2      | 0.99 | SPCC18.17c   | subunit (predicted)                        | 0.92 |
| SPBC27B12.04c | anaphase-promoting complex subunit Cut9    | 0.99 | SPBC21B10.12 | meiotic recombination protein Rec6         | 0.92 |
| SPAC6F12.15c  | serine carboxypeptidase Sxa2               | 0.99 | SPCC1183.01  | exocyst complex subunit Sec15 (predicted)  | 0.91 |
| SPAC1296.03c  | para-aminobenzoate synthase (predicted)    | 0.98 | SPBC15C4.06c | ubiquitin-protein ligase E3 (predicted)    | 0.91 |
| SPBP8B7.29    | telomerase reverse transcriptase 1 protein |      | SPBP35G2.04c | sequence orphan                            | 0.91 |
|               | Trt1                                       | 0.98 | SPBC11C11.03 | spindle pole body protein Ndc80            | 0.91 |
| SPBC29A3.14c  | DNA polymerase epsilon catalytic subunit   |      |              | secretory pathway protein Sec39            |      |
|               | Pol2                                       | 0.98 | SPAC7D4.11c  | (predicted)                                | 0.91 |
| SPBC25H2.13c  | ubiquitin-protein ligase E3%2C coatamer    |      | SPBC24C6.11  | G10 protein                                | 0.91 |
|               | related complex subunit Sea3 (predicted)   | 0.97 | SPBC947.05c  | ferric-chelate reductase Frp2 (predicted)  | 0.90 |
| SPAC11E3.05   | ATP-dependent RNA helicase Slh1            |      |              | DNA replication factor C complex subunit   |      |
|               | (predicted)                                | 0.97 | SPBC947.11c  | Elg1                                       | 0.90 |
| SPBC13G1.10c  | glutamate-1-semialdehyde 2%2C1-            |      |              | mitochondrial ribosomal protein subunit S7 |      |
|               | aminomutase (predicted)                    | 0.97 | SPAC16E8.10c | (predicted)                                | 0.90 |
| SPCC417.11c   | sequence orphan                            | 0.96 |              | RNA polymerase I transcription factor      |      |
| SPAC1B3.20    | inositol-polyphosphate 5-phosphatase%2C    |      | SPBC3B8.11   | subunit Rrn6 (predicted)                   | 0.90 |
|               | synaptojanin homolog 2 (predicted)         | 0.96 | SPAC31G5.15  | phosphatidylserine decarboxylase Psd3      | 0.90 |
| SPBC577.13    | histone demethylase Jmj2                   | 0.96 |              | meiotic dynein intermediate light chain    |      |
| SPAC1002.05c  | sequence orphan                            | 0.95 | SPAC458.04c  | Dli1/Dil1                                  | 0.89 |
| SPCC830.04c   | ubiquitin-protein ligase E3 (predicted)    | 0.95 | SPBC1198.12  | fizzy-related protein Mfr1                 | 0.89 |
| SPBC29A3.03c  | PAK-related kinase Ppk11                   | 0.95 | SPCC417.07c  | MT organizer Mto1                          | 0.89 |
| SPAC2C4.14c   | P-type proton ATPase%2C P3-type Pma2       | 0.95 | SPCC188.08c  | ubiquitin C-terminal hydrolase Ubp5        | 0.89 |
| SPCC1020.01c  | telomere binding protein Rap1              | 0.94 | SPBC32H8.13c | alpha-1%2C3-glucan synthase Mok12          | 0.89 |
| SPBC1778.02   |                                            |      |              |                                            |      |

|              |                                           |      |               |                                         |      |
|--------------|-------------------------------------------|------|---------------|-----------------------------------------|------|
| SPCC757.04   | transcription factor (predicted)          | 0.89 |               | protein                                 |      |
| SPBC1683.11c | isocitrate lyase (predicted)              | 0.88 | SPAC110.02    | cohesin-associated protein Pds5         | 0.84 |
| SPBC28E12.02 | RNA-binding protein                       | 0.88 |               | carboxylic ester hydrolase activity     |      |
| SPAC1093.06c | dynein heavy chain Dhc1                   | 0.88 | SPAC57A10.08c | (predicted)                             | 0.84 |
| SPAC11H11.04 | pheromone p-factor receptor               | 0.88 | SPBC16E9.10c  | AAA family ATPase Rix7 (predicted)      | 0.84 |
| SPBC8E4.05c  | fumarate lyase superfamily                | 0.88 | SPAC323.06c   | NEDD8 activating enzyme (predicted)     | 0.84 |
|              | U3 snoRNP-associated protein Cic1/Utp30   |      |               | Golgi transport complex subunit Cog1    |      |
| SPCC306.07c  | family (predicted)                        | 0.88 | SPAC144.15c   | (predicted)                             | 0.84 |
| SPCC1494.08c | conserved fungal protein                  | 0.87 |               | para-hydroxybenzoate--                  |      |
| SPAC23H3.11c | glucosidase (predicted)                   | 0.87 | SPAC56F8.04c  | polyprenyltransferase Ppt1              | 0.84 |
|              | S. pombe specific UPF0300 family protein  |      |               | queuine tRNA-ribosyltransferase         |      |
| SPCC1259.14c | 5                                         | 0.87 | SPAC2F3.13c   | (predicted)                             | 0.83 |
|              | aminotransferase class-III%2C unknown     |      | SPAC589.02c   | mediator complex subunit Srb9           | 0.83 |
| SPBC1773.03c | specificity                               | 0.86 | SPAC1565.07c  | TATA-binding protein (predicted)        | 0.83 |
|              | small RNA 2'-O-methyltransferase activity |      |               | sister chromatid cohesion protein/DNA   |      |
| SPBC336.05c  | (predicted)                               | 0.86 | SPBC16A3.11   | polymerase eta Eso1 fusion protein      | 0.82 |
|              | 5-oxoprolinase (ATP-hydrolyzing)          |      |               | inner centromere protein%2C             |      |
| SPAC11D3.15  | (predicted)                               | 0.86 | SPBP35G2.03c  | shugoshin%2C Sgo1                       | 0.82 |
|              | S. pombe specific UPF0300 family protein  |      | SPCC63.04     | alpha-1%2C4-glucan synthase Mok14       | 0.82 |
| SPBC1861.06c | 4                                         | 0.86 |               | DNA replication endonuclease-helicase   |      |
|              | WD repeat protein%2C human WDR7           |      | SPBC16D10.04c | Dna2                                    | 0.82 |
| SPBC16H5.13  | ortholog                                  | 0.85 | SPAC31A2.16   | RhoGEF Gef2                             | 0.82 |
|              | ribosome biogenesis factor recycling AAA  |      |               | NAD-dependent glutamate dehydrogenase   |      |
| SPBC56F2.07c | family ATPase (predicted)                 | 0.85 | SPCC132.04c   | Gdh2 (predicted)                        | 0.82 |
| SPBP35G2.10  | SHREC complex subunit Mit1                | 0.85 | SPBC19G7.01c  | MutS protein homolog 2                  | 0.81 |
| SPAC1B1.02c  | NAD/NADH kinase (predicted)               | 0.85 | SPAC16C9.06c  | ATP-dependent RNA helicase Upf1         | 0.81 |
|              | S. pombe specific UPF0300 family protein  |      | SPBC1289.16c  | copper amine oxidase-like protein Cao2  | 0.81 |
| SPAC10F6.15  | 1                                         | 0.85 |               | decaprenyl diphosphate synthase subunit |      |
| SPBC15D4.07c | autophagy associated protein Atg9         | 0.85 | SPBPJ4664.01  | Dps1                                    | 0.81 |
|              | alpha-1%2C2-mannosyltransferase Omh4      |      | SPCC1281.04   | pyridoxal reductase (predicted)         | 0.81 |
| SPBC1773.08c | (predicted)                               | 0.84 | SPAC513.06c   | dihydrodiol dehydrogenase (predicted)   | 0.81 |
| SPAC3G9.12   | CLASP family microtubule-associated       | 0.84 | SPAC23H3.04   | conserved fungal protein                | 0.81 |

|               |                                                                    |      |              |                                                                        |      |
|---------------|--------------------------------------------------------------------|------|--------------|------------------------------------------------------------------------|------|
| SPAC1805.15c  | HECT-type ubiquitin-protein ligase Pub2                            | 0.81 | SPAC3A11.11c | pyridoxal reductase (predicted)                                        | 0.78 |
| SPBC577.09    | ERCC-8 DNA repair homolog                                          | 0.81 | SPAC1002.19  | GTP cyclohydrolase II (predicted)                                      | 0.78 |
| SPCC306.06c   | ER membrane protein%2C BIG1 family (predicted)                     | 0.81 | SPCC285.03   | ATP-dependent RNA helicase Dbp6 (predicted)                            | 0.78 |
| SPCC1223.04c  | ribosomal protein lysine methyltransferase Set11                   | 0.81 | SPAC869.01   | amidase (predicted)                                                    | 0.78 |
| SPBC19C7.02   | N-end-recognizing protein Ubr1                                     | 0.81 | SPCC4G3.07c  | PHD finger containing protein Phf1 mitochondrial dynamin family fusion | 0.78 |
| SPBC577.08c   | thioredoxin-like I protein Tx11                                    | 0.81 | SPBC1706.03  | GTPase protein (predicted)                                             | 0.78 |
| SPBC106.09    | anaphase-promoting complex subunit Apc1                            | 0.80 | SPBC409.12c  | telomere cap complex subunit Stn1                                      | 0.77 |
| SPBC17D11.08  | WD repeat protein%2C DDB1 and CUL4-associated factor 7 (predicted) | 0.80 | SPAC1782.01  | proteasome complex subunit Ecm29                                       | 0.77 |
| SPAC2C4.15c   | UBX domain protein Ubx2                                            | 0.80 | SPAC23D3.13c | guanyl-nucleotide exchange factor (predicted)                          | 0.77 |
| SPBC56F2.03   | actin-like protein Arp10 (predicted)                               | 0.80 | SPAC144.05   | ATP-dependent DNA helicase (predicted)                                 | 0.77 |
| SPAC12B10.16c | conserved protein Mug157                                           | 0.80 | SPAC1687.07  | conserved fungal protein                                               | 0.77 |
| SPBC11C11.04c | tubulin specific chaperone cofactor D%2C Alp1                      | 0.80 | SPAC1D4.10   | 3'-tRNA processing endonuclease tRNAse Z L2 Trz1 (predicted)           | 0.77 |
| SPCC1259.13   | Chk1 protein kinase                                                | 0.80 | SPCC188.13c  | dicer                                                                  | 0.77 |
| SPBP16F5.02   | TFIIH complex cyclin Mcs2                                          | 0.80 | SPBC1348.03  | S. pombe specific 5Tm protein family                                   | 0.77 |
| SPAC1296.04   | spore wall assembly protein (predicted)                            | 0.80 | SPAC3A12.03c | ubiquitin-protein ligase E3 Meu34 (predicted)                          | 0.77 |
| SPBC336.14c   | serine/threonine protein kinase%2C PAN complex subunit%2C Ppk26    | 0.80 | SPBC36B7.09  | eIF2 alpha kinase Gcn2                                                 | 0.76 |
| SPCC1620.04c  | Cdc20/Fizzy subfamily WD repeat protein                            | 0.80 | SPBP8B7.30c  | transcription factor Thi5                                              | 0.76 |
| SPAC18B11.11  | GTPase activating protein (predicted)                              | 0.80 | SPBC336.01   | DNA helicase I                                                         | 0.76 |
| SPCC16C4.15   | mitochondrial ribosomal protein subunit L2 (predicted)             | 0.79 | SPBC29A3.09c | AAA family ATPase Gcn20 (predicted)                                    | 0.76 |
| SPAC1002.12c  | succinate-semialdehyde dehydrogenase                               | 0.79 | SPBP8B7.18c  | phosphomethylpyrimidine kinase (predicted)                             | 0.76 |
| SPCC1672.10   | kinetochore protein Mis16                                          | 0.79 | SPBC1861.05  | pseudouridine-metabolizing bifunctional protein (predicted)            | 0.76 |
| SPBC2G2.10c   | sequence orphan                                                    | 0.79 | SPAC1F3.02c  | MEK kinase (MEKK) Mkh1                                                 | 0.76 |
| SPAC1006.06   | RhoGEF Rgf2                                                        | 0.79 | SPAC27E2.09  | histidine kinase Mak2                                                  | 0.76 |
| SPAC6B12.02c  | DNA repair protein Mus7/Mms22                                      | 0.79 | SPAC688.08   | mediator complex subunit Srb8                                          | 0.75 |
| SPAC31A2.05c  | adherin%2C cohesin loading factor Mis4                             | 0.79 | SPBC29A10.07 | nucleoporin Pom152                                                     | 0.75 |
| SPCC1442.01   | guanyl-nucleotide exchange factor Ste6                             | 0.78 |              |                                                                        |      |

|               |                                             |      |               |                                            |      |
|---------------|---------------------------------------------|------|---------------|--------------------------------------------|------|
| SPAC3C7.02c   | meiotic eisosome BAR domain protein Pil2    | 0.75 | SPCC5E4.10c   | human leukocyte receptor 1 ortholog        | 0.72 |
| SPAC26F1.08c  | conserved protein                           | 0.75 | SPAC22F3.02   | transcription factor Atf31                 | 0.72 |
| SPBC17A3.09c  | lipoate-protein ligase A (predicted)        | 0.74 | SPAC212.03    | hypothetical protein                       | 0.71 |
| SPCC320.05    | sulphate transporter (predicted)            | 0.74 | SPCC4G3.12c   | ubiquitin-protein ligase E3 (predicted)    | 0.71 |
| SPCC11E10.09c | alpha-amylase homolog (predicted)           | 0.74 |               | cleavage factor two Cft2/polyadenylation   |      |
| SPAC513.05    | alpha-mannosidase (predicted)               | 0.74 | SPBC1709.15c  | factor CPSF-73 (predicted)                 | 0.71 |
| SPBC216.05    | ATR checkpoint kinase Rad3                  | 0.74 | SPBC16E9.07   | sequence orphan                            | 0.71 |
|               | 1-phosphatidylinositol 4-kinase Stt4        |      | SPAC23A1.19c  | RecQ type DNA helicase Hrq1 (predicted)    | 0.71 |
| SPBC577.06c   | (predicted)                                 | 0.74 | SPBC29A10.15  | origin recognition complex subunit Orc1    | 0.71 |
|               | mitochondrial 3'-tRNA processing            |      | SPCC126.06    | twinfilin (predicted)                      | 0.70 |
| SPBC3D6.03c   | endonuclease Trz2                           | 0.74 | SPAC25H1.09   | alpha-amylase homolog Mde5                 | 0.70 |
|               | transcription factor TFIIH complex ERCC-    |      |               | mitochondrial carrier%2C calcium binding   |      |
| SPAC17A5.06   | 3 subunit                                   | 0.73 | SPBC12D12.05c | subfamily (predicted)                      | 0.70 |
| SPAC1687.18c  | cohesin loading factor Ssl3                 | 0.73 | SPAC323.03c   | sequence orphan                            | 0.70 |
| SPBC146.03c   | condensin complex subunit Cut3              | 0.73 | SPCC4E9.01c   | meiotic cohesin complex subunit Rec11      | 0.70 |
|               | TATA-binding protein associated factor      |      |               | AFG1 family mitochondrial ATPase           |      |
| SPAC3A12.05c  | Taf2 (predicted)                            | 0.73 | SPBC115.02c   | (predicted)                                | 0.70 |
| SPAC23E2.02   | histone demethylase SWIRM2 (predicted)      | 0.73 | SPAC16E8.13   | ubiquitin-protein ligase E3 (predicted)    | 0.70 |
| SPAC1006.05c  | alpha-1%2C6-mannosyltransferase Och1        | 0.73 | SPAC26H5.12   | mitochondrial RNA polymerase Rpo41         | 0.70 |
| SPAC24H6.03   | cullin 3                                    | 0.73 | SPBC27B12.06  | pig-O (predicted)                          | 0.70 |
| SPCC11E10.08  | silencing protein Rik1                      | 0.72 | SPCC550.10    | aldehyde dehydrogenase Atd3 (predicted)    | 0.70 |
|               | nifs homolog%2C possible cysteine           |      | SPAC24C9.05c  | conserved protein Mug20                    | 0.70 |
| SPCC777.03c   | desulfurase                                 | 0.72 | SPBC577.12    | diphthamide synthetase (predicted)         | 0.70 |
| SPACUNK4.12c  | metallopeptidase (predicted)                | 0.72 |               | mitochondrial single stranded DNA specific |      |
|               | mitochondrial leucine-tRNA ligase           |      |               | 5'-3' exodeoxyribonuclease Exo5            |      |
| SPAC4G8.09    | (predicted)                                 | 0.72 | SPBC685.02    | (predicted)                                | 0.70 |
| SPAC22F3.05c  | ADP-ribosylation factor Alp41               | 0.72 | SPAC3A11.03   | methyltransferase (predicted)              | 0.70 |
|               | replication fork protection complex subunit |      |               | vacuolar protein involved in               |      |
| SPBC216.06c   | Swi1                                        | 0.72 | SPBC25H2.03   | phosphoinositide metabolism (predicted)    | 0.70 |
|               | protein N-terminal amidase Nta1             |      | SPCC320.07c   | RNA-binding protein Mde7                   | 0.69 |
| SPBC23E6.03c  | (predicted)                                 | 0.72 |               | serine/threonine protein kinase%2C NIMA    |      |
| SPAC806.08c   | gamma tubulin complex subunit Mod21         | 0.72 | SPAC19E9.02   | related Fin1                               | 0.69 |

|               |                                             |      |               |                                            |      |
|---------------|---------------------------------------------|------|---------------|--------------------------------------------|------|
| SPCC777.02    | transcription factor (predicted)            | 0.69 | SPBPB21E7.04c | human COMT ortholog 2                      | 0.67 |
| SPBC428.01c   | nucleoporin Nup107                          | 0.69 | SPBC1604.01   | Ergothioneine biosynthesis protein Egt1    | 0.66 |
| SPBC18H10.10c | splicing associated factor Saf4             | 0.69 |               | mitochondrial metalloendopeptidase         |      |
| SPCC188.12    | septin Spn6 (predicted)                     | 0.69 | SPBC119.17    | (predicted)                                | 0.66 |
| SPBC887.13c   | 3-oxoacyl-                                  | 0.68 | SPAC20G4.03c  | eIF2 alpha kinase Hri1                     | 0.66 |
| SPCC162.12    | TORC1 subunit Tco89                         | 0.68 | SPBC2D10.17   | cryptic loci regulator Clr1                | 0.66 |
| SPAC922.07c   | aldehyde dehydrogenase (predicted)          | 0.68 | SPCC1682.03c  | meiotically upregulated gene Mug174        | 0.66 |
| SPBC24C6.06   | G-protein alpha subunit                     | 0.68 | SPAC144.14    | kinesin-like protein Klp8                  | 0.66 |
|               | C1-5%2C6%2C7%2C8-tetrahydrofolate           |      | SPBC26H8.04c  | DEP domain protein                         | 0.66 |
| SPBC839.16    | (THF) synthase%2C trifunctional enzyme      | 0.68 | SPAC19D5.01   | tyrosine phosphatase Pyp2                  | 0.66 |
| SPAC11D3.11c  | zinc finger protein%2C truncated            | 0.68 | SPAC1002.18   | DUF1688 family protein                     | 0.66 |
|               | U5 snRNP-associated protein Prp28           |      | SPCC162.02c   | AMP-binding dehydrogenase (predicted)      | 0.66 |
| SPCC63.11     | (predicted)                                 | 0.68 |               | RNase P and RNase MRP subunit              |      |
|               | Golgi transport complex subunit Cog3        |      | SPAC25B8.16   | (predicted)                                | 0.66 |
| SPBC1539.05   | (predicted)                                 | 0.68 |               | gamma tubulin complex Spc98/GCP3           |      |
| SPCC5E4.06    | Smc5-6 complex SMC subunit Smc6             | 0.68 | SPBC428.20c   | subunit Alp6                               | 0.66 |
| SPAC23D3.06c  | nucleoporin Nup146                          | 0.68 |               | mannan endo-1%2C6-alpha-mannosidase        |      |
| SPAC25G10.07c | kinesin-like protein Cut7                   | 0.68 | SPCC970.02    | (predicted)                                | 0.66 |
| SPCC553.09c   | DNA polymerase alpha B-subunit              | 0.67 | SPBC776.13    | condensin complex non-SMC subunit Cnd1     | 0.66 |
| SPAC23C4.05c  | LEA domain protein                          | 0.67 | SPBC56F2.04   | U3 snoRNP protein Utp20 (predicted)        | 0.66 |
|               | mitochondrial translation elongation factor |      |               | centractin family actin-like protein Arp1  |      |
| SPBC660.10    | G (predicted)                               | 0.67 | SPBC1347.12   | (predicted)                                | 0.66 |
|               | TRAPP complex subunit Trs120                |      | SPAC17G6.12   | cullin 1                                   | 0.65 |
| SPAC6G10.05c  | (predicted)                                 | 0.67 | SPBC24C6.09c  | phosphoketolase family protein (predicted) | 0.65 |
| SPCC757.05c   | peptidase family M20 protein                | 0.67 |               | Ypt/Rab-specific guanyl-nucleotide         |      |
|               | mitotic cohesin complex%2C non-SMC          |      | SPAC1851.04c  | exchange factor (GEF) subunit Ric1         | 0.65 |
| SPCC338.17c   | subunit Rad21 (kleisin)                     | 0.67 | SPBC1683.13c  | transcription factor Cha4 (predicted)      | 0.65 |
| SPBC216.03    | conserved fungal protein                    | 0.67 |               | ATP-dependent DNA helicase%2C UvrD         |      |
| SPBC1105.10   | RAVE complex subunit Rav1                   | 0.67 | SPAC4H3.05    | subfamily                                  | 0.65 |
|               | ATP-dependent RNA/DNA helicase              |      |               | meiotic chromosome segregation protein     |      |
| SPBC15C4.05   | (predicted)                                 | 0.67 | SPBC428.07    | Meu6                                       | 0.65 |
| SPCC584.02    | middle-meiotic transcription factor Cuf2    | 0.67 | SPBC336.04    | DNA polymerase delta catalytic subunit     | 0.65 |



|               |                                            |      |               |                                           |      |
|---------------|--------------------------------------------|------|---------------|-------------------------------------------|------|
|               | Cdc6                                       |      | SPBC16A3.13   | alpha-amylase homolog Aah4                | 0.63 |
| SPAC25G10.01  | RNA-binding protein                        | 0.65 | SPBC30D10.10c | phosphatidylinositol kinase Tor1          | 0.63 |
| SPBC1703.04   | MutL family protein Mlh1 (predicted)       | 0.65 | SPCC5E4.04    | separase/separin                          | 0.63 |
|               | Tel2 interacting protein Tti2%2C predicted |      | SPCC16C4.17   | meiotically upregulated gene Mug123       | 0.63 |
| SPBC1604.17c  | ASTRA complex subunit                      | 0.65 | SPAC8F11.03   | MutS protein homolog 3                    | 0.63 |
| SPBC1A4.10c   | mediator complex subunit Pmc1              | 0.64 |               | 5-oxoprolinase (ATP-hydrolyzing)          |      |
| SPAC24C9.07c  | 1%2C3-beta-glucan synthase subunit Bgs2    | 0.64 | SPAC11D3.14c  | (predicted)                               | 0.62 |
| SPAC16E8.02   | DUF962 family protein                      | 0.64 |               | transcription factor TFIIF complex beta   |      |
| SPAC2G11.12   | RecQ type DNA helicase Rqh1                | 0.64 | SPBC1198.13c  | subunit Tfg2 (predicted)                  | 0.62 |
| SPCC1259.11c  | GTPase activating protein Gyp2 (predicted) | 0.64 |               | ATP-dependent DNA helicase Rhp16b         |      |
| SPCC338.16    | F-box protein Pof3                         | 0.64 | SPBC582.10c   | (predicted)                               | 0.62 |
| SPBC725.05c   | nucleotide pyrophosphatase (predicted)     | 0.64 | SPAC6F6.01    | calcium channel Cch1                      | 0.62 |
| SPCC965.10    | transcription factor (predicted)           | 0.64 | SPCC1620.11   | nucleoporin Nic96 homolog                 | 0.62 |
|               | sorting receptor for vacuolar proteins%2C  |      | SPAC3A11.02   | zinc finger protein Cps3                  | 0.62 |
| SPBC16C6.06   | Vps10                                      | 0.64 |               | triglyceride lipase-cholesterol esterase  |      |
| SPBC336.11    | GARP complex subunit Vps52 (predicted)     | 0.64 | SPBC16A3.12c  | (predicted)                               | 0.62 |
| SPBC11C11.11c | ATP helicase Irc3 (predicted)              | 0.64 |               | trifunctional dihydropteroatesynthase/2-  |      |
| SPAC1F3.06c   | sporulation protein Spo15                  | 0.64 |               | amino-4-hydroxy-6-hydro                   |      |
|               | ATP-dependent RNA helicase Mak5            |      | SPBC1734.03   | xymethyl-dihydropteridinediphosphokinase/ |      |
| SPBC4F6.07c   | (predicted)                                | 0.64 |               | dihydroneopterin aldolase (predicted)     | 0.62 |
| SPBC1773.17c  | glyoxylate reductase (predicted)           | 0.64 | SPCC330.11    | BTB/POZ domain protein Btb1               | 0.62 |
| SPAC11E3.11c  | guanyl-nucleotide exchange factor Syt22    | 0.64 | SPAC29E6.01   | F-box protein Pof11                       | 0.62 |
|               | RNA polymerase II nuclear import protein   |      | SPBC887.12    | P-type ATPase (predicted)                 | 0.62 |
| SPBC20F10.08c | Rtp1 (predicted)                           | 0.63 |               | ATPase with bromodomain protein           |      |
| SPAPB17E12.03 | ubiquitin-protein ligase E3 (predicted)    | 0.63 | SPBP22H7.05c  | (predicted)                               | 0.62 |
| SPCC4B3.04c   | lysophospholipase (predicted)              | 0.63 |               | WD repeat protein involved in autophagy   |      |
| SPAC3G6.01    | ATP-dependent DNA helicase Hrp3            | 0.63 | SPAC823.16c   | Atg18b                                    | 0.61 |
|               | CORVET complex subunit%2C GTPase           |      |               | ATP(CTP) tRNA nucleotidyltransferase      |      |
| SPCC364.05    | regulator Vps3 (predicted)                 | 0.63 | SPCC645.10    | (predicted)                               | 0.61 |
| SPBC1709.19c  | NifU-like protein (predicted)              | 0.63 | SPBC17D1.07c  | GTPase regulator Rng2-like (predicted)    | 0.61 |
| SPAC1556.01c  | DNA repair protein Rad50                   | 0.63 |               | HOPs/CORVET complex subunit Vps11         |      |
| SPBC31F10.14c | HIRA interacting protein Hip3              | 0.63 | SPAC823.12    | (predicted)                               | 0.61 |

|              |                                                                   |      |               |                                                                                |      |
|--------------|-------------------------------------------------------------------|------|---------------|--------------------------------------------------------------------------------|------|
| SPBC18H10.05 | WD repeat protein%2C human WDR44 family                           | 0.61 | SPBC16A3.10   | membrane bound O-acyltransferase%2C MBOAT (predicted)                          | 0.60 |
| SPAC328.04   | AAA family ATPase%2C unknown biological role                      | 0.61 | SPBC582.05c   | BRCT domain protein Brc1                                                       | 0.60 |
| SPBC21H7.06c | inositol metabolism protein Opi10 (predicted)                     | 0.61 | SPCC1840.08c  | protein disulfide isomerase (predicted)                                        | 0.60 |
| SPAC17A5.16  | Ubp5 interacting protein Ftp105                                   | 0.61 | SPBC21.06c    | serine/threonine protein kinase Cdc7                                           | 0.60 |
| SPCC1795.01c | mitotic spindle checkpoint protein Mad3                           | 0.61 | SPAC13F5.06c  | exocyst complex subunit Sec10                                                  | 0.60 |
| SPBC1A4.09   | pseudouridine synthase (predicted)                                | 0.61 | SPAC167.01    | serine/threonine protein kinase%2C sensor for unfolded proteins in the ER Ire1 | 0.60 |
| SPAC2C4.13   | V-type ATPase V0 subunit c" (predicted)                           | 0.61 | SPAC3G9.13c   | mitochondrial tryptophan-tRNA ligase Msw1 (predicted)                          | 0.59 |
| SPBC776.05   | membrane transporter (predicted)                                  | 0.61 | SPAC2F7.10    | palmitoyltransferase Akr1 (predicted)                                          | 0.59 |
| SPBC2A9.11c  | nuclear export factor (predicted)                                 | 0.61 | SPCC550.09    | peroxin Pex32 (predicted)                                                      | 0.59 |
| SPAC6F6.17   | telomere length regulator protein Rif1                            | 0.61 | SPAC23D3.14c  | alpha-amylase homolog Aah2 (predicted)                                         | 0.59 |
| SPAC3H5.09c  | conserved eukaryotic mitochondrial protein (predicted)            | 0.61 | SPAC30D11.01c | alpha-glucosidase (predicted)                                                  | 0.59 |
| SPAC144.16   | sister chromatid cohesion protein (predicted)                     | 0.61 | SPBC23E6.02   | ATP-dependent DNA helicase (predicted)                                         | 0.59 |
| SPCC14G10.01 | dephospho-CoA kinase (predicted)                                  | 0.61 | SPAC644.11c   | mitochondrial pyruvate dehydrogenase (lipoamide) kinase Pkp1 (predicted)       | 0.59 |
| SPBC902.04   | RNA-binding protein                                               | 0.60 | SPAC13G6.12c  | chitin synthase I                                                              | 0.59 |
| SPAC959.06c  | conserved fungal protein                                          | 0.60 | SPBP23A10.13  | origin recognition complex subunit Orc4                                        | 0.59 |
| SPAC17A5.01  | peroxin-6 (predicted)                                             | 0.60 | SPBC12C2.08   | dynamamin Dnm1                                                                 | 0.59 |
| SPCC1494.07  | tRNA 2'-O-methylase subunit Trm72 (predicted)                     | 0.60 | SPBC3D6.10    | AP-endonuclease Apn2                                                           | 0.59 |
| SPAC15E1.07c | meiotic cohesin complex associated protein Moa1                   | 0.60 | SPBC18A7.01   | X-Pro dipeptidase (predicted)                                                  | 0.59 |
| SPCC1620.10  | complexed with Cdc5 protein Cwf26                                 | 0.60 | SPAC31G5.07   | tetraspan protein Dni1                                                         | 0.59 |
| SPAPB1A11.03 | cytochrome b2 (L-lactate cytochrome-c oxidoreductase) (predicted) | 0.60 | SPCC1450.12   | PXA domain protein                                                             | 0.59 |
| SPCC1919.05  | Ski complex TPR repeat subunit Ski3 (predicted)                   | 0.60 | SPAC27E2.01   | alpha-amylase homolog (predicted)                                              | 0.59 |
| SPCC306.10   | wtf element Wtf8                                                  | 0.60 | SPBC21B10.13c | MBF complex negative regulatory component Yox1                                 | 0.58 |
| SPCC736.11   | argonaute                                                         | 0.60 | SPBC115.03    | gfo/idh/mocA family oxidoreductase (predicted)                                 | 0.58 |
|              |                                                                   |      | SPAPB17E12.02 | SMN family protein Yip12                                                       | 0.58 |
|              |                                                                   |      | SPAC26H5.04   | vacuolar import and degradation protein Vid28 (predicted)                      | 0.58 |

|                |                                             |      |               |                                           |      |
|----------------|---------------------------------------------|------|---------------|-------------------------------------------|------|
| SPAC15A10.10   | Muskelin homolog (predicted)                | 0.58 |               | aldo/keto reductase%2C unknown            |      |
| SPAC23C11.10   | RNA processing protein (predicted)          | 0.58 | SPBC215.11c   | biological role                           | 0.57 |
| SPAC25H1.02    | histone demethylase Jmj1 (predicted)        | 0.58 |               | glycerophosphoryl diester                 |      |
| SPAC17G6.05c   | BRO1 domain protein Bro1 (predicted)        | 0.58 | SPAPB1E7.05   | phosphodiesterase Gde1 (predicted)        | 0.57 |
| SPBC1683.04    | glycosyl hydrolase family 3 (predicted)     | 0.58 | SPCC18.04     | F-box protein Pof6                        | 0.57 |
| SPAC4A8.05c    | myosin II heavy chain Myo3                  | 0.58 | SPAC17A5.18c  | meiotic recombination protein Rec25       | 0.57 |
|                | histone H4-like TAF Taf6%2C SAGA            |      |               | ATP-dependent RNA helicase%2C             |      |
| SPCC16C4.18c   | complex subunit                             | 0.58 | SPAC20H4.09   | spliceosomal (predicted)                  | 0.56 |
|                | mitochondrial ribosomal protein subunit     |      | SPAC1006.02   | Astra associated protein 1 Asa1           | 0.56 |
| SPBC14C8.16c   | S35                                         | 0.58 | SPBC1711.17   | ATP-dependent RNA helicase Prp16          | 0.56 |
|                | trehalose-phosphate synthase Tps2           |      | SPBC1347.01c  | deoxycytidyl transferase Rev1 (predicted) | 0.56 |
| SPAC3G6.09c    | (predicted)                                 | 0.58 | SPAC3A11.06   | sorting nexin Mvp1 (predicted)            | 0.56 |
| SPBC3E7.08c    | DNA repair nuclease Rad13                   | 0.58 | SPBC25H2.11c  | SAGA complex bromodomain subunit Spt7     | 0.56 |
| SPCC962.02c    | survivin%2C Bir1                            | 0.58 | SPAC1783.05   | ATP-dependent DNA helicase Hrp1           | 0.55 |
| SPBC28E12.06c  | beige protein homolog (predicted)           | 0.58 | SPBC215.02    | prefoldin subunit 5 (predicted)           | 0.55 |
| SPCC830.10     | nucleoside triphosphatase (predicted)       | 0.58 | SPBC3D6.04c   | mitotic spindle checkpoint protein Mad1   | 0.55 |
| SPAC9G1.09     | PAK-related GC kinase Sid1                  | 0.58 |               | guanyl-nucleotide exchange factor Sec73   |      |
| SPAC13C5.06c   | sequence orphan                             | 0.57 | SPAC19A8.01c  | (predicted)                               | 0.55 |
|                | Rab GTPase binding protein upregulated in   |      | SPBC725.04    | oxalyl-CoA decarboxylase (predicted)      | 0.55 |
| SPAC2E1P5.02c  | meiosis II (predicted)                      | 0.57 | SPBC16E9.08   | prospore membrane protein Mcp4/Mug101     | 0.55 |
| SPAC13G7.07    | argonaute binding protein 2                 | 0.57 |               | RNA export factor%2C cytoplasmic          |      |
|                | transcription factor%2C zf-fungal binuclear |      | SPBC31E1.05   | nucleoporin Gle1                          | 0.55 |
| SPBC16G5.17    | cluster type (predicted)                    | 0.57 | SPBC146.11c   | meiotically upregulated gene Mug97        | 0.55 |
| SPCC132.03     | sequence orphan                             | 0.57 | SPAC15A10.16  | actin interacting protein 3 homolog Bud6  | 0.55 |
| SPAPB17E12.04c | COP9/signalosome complex subunit Csn2       | 0.57 |               | 4-amino-5-hydroxymethyl-2-                |      |
|                | elongator complex%2C histone                |      | SPCC1223.02   | methylpyrimidine phosphate synthase Nmt1  | 0.54 |
| SPAC29A4.20    | acetyltransferase subunit Elp3 (predicted)  | 0.57 |               | LAlv9 family protein%2C involved in post  |      |
| SPBC21C3.20c   | C2 domain protein Git1                      | 0.57 | SPAC23H3.14   | Golgi transport (predicted)               | 0.54 |
|                | FAD-dependent amino acid oxidase            |      | SPAC6G9.04    | sporulation protein Spo7                  | 0.54 |
|                | involved in late endosome to Golgi          |      | SPBC24C6.10c  | WISH/DIP/SPIN90 ortholog Dip1             | 0.54 |
| SPAC6G10.06    | transport (predicted)                       | 0.57 | SPCC18B5.07c  | nucleoporin Nup61                         | 0.54 |
| SPCC895.07     | TOG ortholog Alp14                          | 0.57 | SPAC30D11.08c | Lsd1/2 complex PHD finger containing      | 0.54 |

|               |                                            |      |              |                                           |      |
|---------------|--------------------------------------------|------|--------------|-------------------------------------------|------|
|               | protein Phf2                               |      |              | 5-carboxymethylaminomethyl modification   |      |
| SPCC569.04    | sequence orphan                            | 0.54 |              | enzyme (predicted)                        |      |
| SPAC824.08    | guanosine-diphosphatase Gda1               | 0.54 |              | high-affinity import carrier for          |      |
| SPAC20H4.10   | ubiquitin-protein ligase E4 (predicted)    | 0.54 |              | pyridoxine%2C pyridoxal%2C and            |      |
| SPAC10F6.09c  | mitotic cohesin complex subunit Psm3       | 0.54 | SPAC17A2.01  | pyridoxamine Bsu1                         | 0.53 |
| SPCC338.02    | sequence orphan                            | 0.54 | SPAC1250.01  | ATP-dependent DNA helicase Snf21          | 0.53 |
|               | WD repeat protein%2C human WDR26           |      |              | DNA replication factor C complex subunit  |      |
|               | family%2C ubiquitin ligase complex         |      | SPAC1687.03c | Rfc4 (predicted)                          | 0.53 |
| SPAC343.04c   | subunit (predicted)                        | 0.54 |              | LEM domain protein Man1%2C Sad1           |      |
|               | Pof6 interacting protein Sip1%2C predicted |      | SPAC14C4.05c | interacting factor (predicted)            | 0.53 |
| SPBC27B12.08  | AP-1 accessory protein                     | 0.54 | SPAC1071.02  | Dos2 silencing complex subunit Mms19      | 0.53 |
|               | mitochondrial intermediate peptidase Oct1  |      |              | NatA N-acetyltransferase complex subunit  |      |
| SPAC1F3.10c   | (predicted)                                | 0.54 | SPBC418.02   | (predicted)                               | 0.53 |
|               | 3-hydroxyacyl-ACP dehydratase Htd2         |      | SPCC285.06c  | wtf element Wtf17                         | 0.53 |
| SPBC1105.15c  | (predicted)                                | 0.54 | SPAC10F6.02c | ATP-dependent RNA helicase Prp22          | 0.53 |
|               | peroxisomal ubiquitin-protein ligase E3    |      | SPBC32H8.06  | TPR repeat protein%2C meiotically spliced | 0.53 |
| SPBC17A3.10   | (predicted)                                | 0.54 | SPBC29A10.02 | meiotic RNA-binding protein 1             | 0.53 |
|               | ubiquitin C-terminal hydrolase%2C          |      | SPAC1687.02  | CAAX prenyl protease (predicted)          | 0.53 |
|               | poly(A)-specific ribonuclease complex      |      | SPAC20H4.06c | RNA-binding protein                       | 0.53 |
| SPAC22G7.04   | subunit Pan2 (predicted)                   | 0.53 |              | dolichol-phosphate mannosyltransferase    |      |
| SPBC646.02    | complexed with Cdc5 protein Cwf11          | 0.53 | SPAC31G5.16c | catalytic subunit Dpm1                    | 0.52 |
| SPAC24C9.15c  | septin Spn5                                | 0.53 | SPCC1919.11  | BAR adaptor protein                       | 0.52 |
| SPAC6G9.16c   | sequence orphan                            | 0.53 | SPBC1773.05c | hexitol dehydrogenase (predicted)         | 0.52 |
| SPBC1709.08   | cleavage factor one Cft1 (predicted)       | 0.53 |              | mitochondrial isoleucine-tRNA ligase      |      |
|               | MBF transcription factor complex subunit   |      | SPCC18B5.08c | (predicted)                               | 0.52 |
| SPAC22F3.09c  | Res2                                       | 0.53 | SPBC3D6.09   | DNA polymerase epsilon subunit Dpb4       | 0.52 |
|               | karyopherin%2C nuclear import receptor     |      | SPBC18H10.09 | zf-CHY type zinc finger protein           | 0.52 |
| SPBC11G11.07  | Mtr10 (predicted)                          | 0.53 |              | 1-phosphatidylinositol-3-phosphate 5-     |      |
| SPAC12B10.14c | pseudokinase Tea5                          | 0.53 | SPBC3E7.01   | kinase Fab1                               | 0.52 |
|               | glucose-6-phosphate 1-dehydrogenase        |      |              | triglyceride lipase-cholesterol esterase  |      |
| SPAC3C7.13c   | (predicted)                                | 0.53 | SPBC14C8.15  | (predicted)                               | 0.52 |
| SPBC30B4.06c  | mitochondrial GIDA family tRNA uridine     | 0.53 | SPCC622.13c  | Tel Two Interacting protein 1             | 0.52 |

|               |                                                           |      |               |                                         |      |
|---------------|-----------------------------------------------------------|------|---------------|-----------------------------------------|------|
| SPCC16A11.12c | ubiquitin C-terminal hydrolase Ubp1                       | 0.52 |               | oxamide synthase%2C SAICAR              |      |
|               | transcription factor%2C zf-fungal binuclear               |      |               | synthetase%2C Ade7                      |      |
| SPAC139.03    | cluster type (predicted)                                  | 0.52 | SPBC543.03c   | Ku domain protein Pku80                 | 0.51 |
| SPAC20G8.01   | ATP-dependent DNA ligase Cdc17                            | 0.52 | SPBC839.10    | U1 snRNP-associated protein Usp107      | 0.51 |
|               | mitochondrial ATP-dependent RNA                           |      | SPCC1753.05   | RNA export factor Rsm1                  | 0.51 |
| SPBC691.04    | helicase Mss116 (predicted)                               | 0.52 | SPBC1734.07c  | TRAPP complex subunit Trs85 (predicted) | 0.51 |
| SPBC1709.07   | 3-keto sterol reductase (predicted)                       | 0.52 | SPBC20F10.07  | GRAM domain protein                     | 0.51 |
| SPBC1685.06   | poly(A) polymerase Cid11 (predicted)                      | 0.52 | SPCC1620.12c  | GTPase activating protein (predicted)   | 0.51 |
| SPBC20F10.05  | NRDE-2 family protein (predicted)                         | 0.52 | SPBC17A3.08   | TatD homolog (predicted)                | 0.51 |
| SPAC1952.11c  | urease Ure2                                               | 0.52 | SPAC821.13c   | P-type ATPase (predicted)               | 0.51 |
| SPCC31H12.02c | membrane transporter (predicted)                          | 0.52 | SPAC1486.04c  | medial ring protein Alm1                | 0.51 |
| SPBC902.02c   | RFC-like complex subunit Ctf18                            | 0.52 |               | inositol polyphosphate phosphatase      |      |
| SPBC211.04c   | MCM complex subunit Mcm6                                  | 0.52 | SPAC1093.03   | (predicted)                             | 0.51 |
|               | phosphoacetylglucosamine mutase                           |      | SPAC1006.03c  | RNA elimination defective protein Red1  | 0.51 |
| SPAC1296.01c  | (predicted)                                               | 0.51 |               | Cds1/Rad53/Chk2 family protein kinase   |      |
| SPAC8F11.07c  | DNA replication protein Cdc24                             | 0.51 | SPAC14C4.03   | Mek1                                    | 0.51 |
| SPBC691.05c   | membrane transporter (predicted)                          | 0.51 | SPAC2F7.16c   | phospholipase D%2C Pld1                 | 0.51 |
|               | SMARCAD1 family ATP-dependent DNA                         |      | SPCC970.01    | DNA repair endonuclease XPF             | 0.50 |
| SPAC20G8.08c  | helicase Fft1 (predicted)                                 | 0.51 |               | UDP-glucose-glycoprotein                |      |
| SPAC22F3.03c  | ATP-dependent DNA helicase Rdh54                          | 0.51 | SPBPJ4664.06  | glucosyltransferase Gpt1                | 0.50 |
| SPBC1685.14c  | Vid27 family protein                                      | 0.51 |               | guanyl-nucleotide exchange factor       |      |
| SPAC4A8.02c   | conserved protein%2C UPF0047 family                       | 0.51 | SPBC211.03c   | (predicted)                             | 0.50 |
| SPAC5H10.04   | NADPH dehydrogenase (predicted)                           | 0.51 | SPAC23C4.16c  | autophagy associated lipase Atg15       | 0.50 |
| SPBC651.10    | Smc5-6 complex non-SMC subunit Nse5                       | 0.51 | SPBP19A11.07c | human HID1 ortholog 2                   | 0.50 |
|               | MBF transcription factor complex subunit                  |      |               | human CTD-binding SR-like protein rA9   |      |
| SPBC2D10.06   | Rep1                                                      | 0.51 | SPCC126.07c   | homolog (predicted)                     | 0.50 |
| SPAC20H4.11c  | Rho family GTPase Rho5                                    | 0.51 |               | glucan 1%2C4-alpha-glucosidase          |      |
| SPBP4H10.20   | m7G(5')pppN diphosphatase (predicted)                     | 0.51 | SPAC4H3.03c   | (predicted)                             | 0.50 |
|               | NatC N-acetyltransferase complex subunit                  |      | SPCC285.07c   | wtf element Wtf18                       | 0.50 |
| SPBC1861.03   | Mak10 (predicted)                                         | 0.51 |               |                                         |      |
| SPBC409.10    | phosphoribosylamidoimidazolesuccinocarboxamide synthetase | 0.51 |               |                                         |      |

**Table S2. GO terms enriched in H4K20me1-associated genes**

| <b>GO_term</b> | <b>description</b>                                          | <b>fraction in selection</b> | <b>fraction total</b> | <b># in selection (&gt;0.5)</b> | <b># total in GO term</b> | <b>enrichment</b> | <b>P-value</b> |
|----------------|-------------------------------------------------------------|------------------------------|-----------------------|---------------------------------|---------------------------|-------------------|----------------|
| GO:0000502     | proteasome complex                                          | 0.024                        | 0.008                 | 28                              | 40                        | 3.10              | 2.2E-11        |
| GO:0005838     | proteasome regulatory particle                              | 0.012                        | 0.004                 | 14                              | 19                        | 3.26              | 2.8E-07        |
| GO:0071540     | eukaryotic translation initiation factor 3 complex, eIF3e   | 0.008                        | 0.002                 | 9                               | 10                        | 3.99              | 3.3E-07        |
| GO:0005852     | eukaryotic translation initiation factor 3 complex          | 0.009                        | 0.002                 | 10                              | 12                        | 3.69              | 7.1E-07        |
| GO:0009116     | nucleoside metabolic process                                | 0.02                         | 0.009                 | 23                              | 44                        | 2.32              | 3.8E-06        |
| GO:0004298     | threonine-type endopeptidase activity                       | 0.009                        | 0.003                 | 11                              | 15                        | 3.25              | 3.8E-06        |
| GO:0006631     | fatty acid metabolic process                                | 0.016                        | 0.007                 | 19                              | 34                        | 2.48              | 5.2E-06        |
| GO:0006085     | acetyl-CoA biosynthetic process                             | 0.006                        | 0.002                 | 7                               | 8                         | 3.88              | 6.6E-06        |
| GO:0016282     | eukaryotic 43S preinitiation complex                        | 0.006                        | 0.002                 | 7                               | 8                         | 3.88              | 6.6E-06        |
| GO:0006084     | acetyl-CoA metabolic process                                | 0.014                        | 0.006                 | 16                              | 29                        | 2.44              | 2.9E-05        |
| GO:0003743     | translation initiation factor activity                      | 0.016                        | 0.007                 | 19                              | 37                        | 2.28              | 2.9E-05        |
| GO:0009085     | lysine biosynthetic process                                 | 0.005                        | 0.001                 | 6                               | 7                         | 3.80              | 2.9E-05        |
| GO:0006537     | glutamate biosynthetic process                              | 0.006                        | 0.002                 | 7                               | 9                         | 3.45              | 4.8E-05        |
| GO:0030686     | 90S preribosome                                             | 0.006                        | 0.002                 | 7                               | 9                         | 3.45              | 4.8E-05        |
| GO:0006614     | SRP-dependent cotranslational protein targeting to membrane | 0.008                        | 0.003                 | 9                               | 13                        | 3.07              | 4.8E-05        |
| GO:0008540     | proteasome regulatory particle, base subcomplex             | 0.007                        | 0.002                 | 8                               | 11                        | 3.22              | 5.2E-05        |
| GO:0006536     | glutamate metabolic process                                 | 0.012                        | 0.005                 | 14                              | 25                        | 2.48              | 5.9E-05        |
| GO:0005732     | small nucleolar ribonucleoprotein complex                   | 0.02                         | 0.01                  | 23                              | 50                        | 2.04              | 6.2E-05        |
| GO:0016769     | transferase activity, transferring nitrogenous groups       | 0.012                        | 0.005                 | 14                              | 26                        | 2.39              | 1.1E-04        |
| GO:0006086     | acetyl-CoA biosynthetic process from pyruvate               | 0.004                        | 0.001                 | 5                               | 6                         | 3.69              | 1.3E-04        |
| GO:0000103     | sulfate assimilation                                        | 0.004                        | 0.001                 | 5                               | 6                         | 3.69              | 1.3E-04        |
| GO:0005967     | mitochondrial pyruvate dehydrogenase complex                | 0.004                        | 0.001                 | 5                               | 6                         | 3.69              | 1.3E-04        |
| GO:0006613     | cotranslational protein targeting to membrane               | 0.008                        | 0.003                 | 9                               | 14                        | 2.85              | 1.3E-04        |
| GO:0045047     | protein targeting to ER                                     | 0.011                        | 0.005                 | 13                              | 24                        | 2.40              | 1.6E-04        |
| GO:0006188     | IMP biosynthetic process                                    | 0.007                        | 0.002                 | 8                               | 12                        | 2.95              | 1.7E-04        |
| GO:0005832     | chaperonin-containing T-complex                             | 0.005                        | 0.002                 | 6                               | 8                         | 3.32              | 1.9E-04        |
| GO:0000289     | nuclear-transcribed mRNA poly(A) tail shortening            | 0.005                        | 0.002                 | 6                               | 8                         | 3.32              | 1.9E-04        |

|            |                                                       |       |       |    |    |      |         |
|------------|-------------------------------------------------------|-------|-------|----|----|------|---------|
| GO:0006213 | pyrimidine nucleoside metabolic process               | 0.006 | 0.002 | 7  | 10 | 3.10 | 1.9E-04 |
| GO:0000054 | ribosomal subunit export from nucleus                 | 0.013 | 0.006 | 15 | 30 | 2.22 | 2.3E-04 |
| GO:0006633 | fatty acid biosynthetic process                       | 0.01  | 0.004 | 12 | 22 | 2.42 | 2.3E-04 |
| GO:0009070 | serine family amino acid biosynthetic process         | 0.008 | 0.003 | 9  | 15 | 2.66 | 3.2E-04 |
| GO:0030515 | snoRNA binding                                        | 0.012 | 0.005 | 14 | 28 | 2.22 | 3.4E-04 |
| GO:0006144 | purine base metabolic process                         | 0.009 | 0.003 | 10 | 18 | 2.46 | 4.8E-04 |
| GO:0000243 | commitment complex                                    | 0.006 | 0.002 | 7  | 11 | 2.82 | 5.6E-04 |
| GO:0009082 | branched chain family amino acid biosynthetic process | 0.006 | 0.002 | 7  | 11 | 2.82 | 5.6E-04 |
| GO:0007007 | inner mitochondrial membrane organization             | 0.008 | 0.003 | 9  | 16 | 2.49 | 6.9E-04 |
| GO:0005685 | U1 snRNP                                              | 0.008 | 0.003 | 9  | 16 | 2.49 | 6.9E-04 |
| GO:0006206 | pyrimidine base metabolic process                     | 0.008 | 0.003 | 9  | 16 | 2.49 | 6.9E-04 |
| GO:0008483 | transaminase activity                                 | 0.01  | 0.005 | 12 | 24 | 2.22 | 7.4E-04 |
| GO:0008655 | pyrimidine salvage                                    | 0.004 | 0.001 | 5  | 7  | 3.16 | 7.4E-04 |
| GO:0008541 | proteasome regulatory particle, lid subcomplex        | 0.004 | 0.001 | 5  | 7  | 3.16 | 7.4E-04 |
| GO:0016597 | amino acid binding                                    | 0.004 | 0.001 | 5  | 7  | 3.16 | 7.4E-04 |
| GO:0016651 | oxidoreductase activity, acting on NADH or NADPH      | 0.009 | 0.004 | 10 | 19 | 2.33 | 9.1E-04 |
| GO:0042176 | regulation of protein catabolic process               | 0.009 | 0.004 | 10 | 19 | 2.33 | 9.1E-04 |
| GO:0045039 | protein import into mitochondrial inner membrane      | 0.006 | 0.002 | 7  | 12 | 2.58 | 0.0014  |
| GO:0051539 | 4 iron, 4 sulfur cluster binding                      | 0.009 | 0.004 | 10 | 20 | 2.22 | 0.0016  |
| GO:0030684 | preribosome                                           | 0.009 | 0.004 | 11 | 23 | 2.12 | 0.0018  |
| GO:0006189 | 'de novo' IMP biosynthetic process                    | 0.005 | 0.002 | 6  | 10 | 2.66 | 0.0018  |
| GO:0016831 | carboxy-lyase activity                                | 0.007 | 0.003 | 8  | 15 | 2.36 | 0.0019  |
| GO:0016455 | RNA polymerase II transcription mediator activity     | 0.007 | 0.003 | 8  | 15 | 2.36 | 0.0019  |
| GO:0006531 | aspartate metabolic process                           | 0.004 | 0.002 | 5  | 8  | 2.77 | 0.0024  |
| GO:0006551 | leucine metabolic process                             | 0.004 | 0.002 | 5  | 8  | 2.77 | 0.0024  |
| GO:0009097 | isoleucine biosynthetic process                       | 0.004 | 0.002 | 5  | 8  | 2.77 | 0.0024  |
| GO:0030015 | CCR4-NOT core complex                                 | 0.004 | 0.002 | 5  | 8  | 2.77 | 0.0024  |
| GO:0043101 | purine salvage                                        | 0.004 | 0.002 | 5  | 8  | 2.77 | 0.0024  |
| GO:0006568 | tryptophan metabolic process                          | 0.006 | 0.003 | 7  | 13 | 2.39 | 0.0028  |
| GO:0051170 | nuclear import                                        | 0.006 | 0.003 | 7  | 13 | 2.39 | 0.0028  |
| GO:0010181 | FMN binding                                           | 0.006 | 0.003 | 7  | 13 | 2.39 | 0.0028  |

|            |                                                                           |       |       |    |    |      |        |
|------------|---------------------------------------------------------------------------|-------|-------|----|----|------|--------|
| GO:0000288 | nuclear-transcribed mRNA catabolic process, deadenylation-dependent decay | 0.008 | 0.004 | 9  | 19 | 2.10 | 0.0040 |
| GO:0004725 | protein tyrosine phosphatase activity                                     | 0.005 | 0.002 | 6  | 11 | 2.42 | 0.0041 |
| GO:0000105 | histidine biosynthetic process                                            | 0.005 | 0.002 | 6  | 11 | 2.42 | 0.0041 |
| GO:0016592 | mediator complex                                                          | 0.009 | 0.004 | 10 | 22 | 2.01 | 0.0043 |
| GO:0000395 | nuclear mRNA 5'-splice site recognition                                   | 0.006 | 0.003 | 7  | 14 | 2.22 | 0.0053 |
| GO:0015450 | P-P-bond-hydrolysis-driven protein transmembrane transporter activity     | 0.006 | 0.003 | 7  | 14 | 2.22 | 0.0053 |
| GO:0007021 | tubulin complex assembly                                                  | 0.006 | 0.003 | 7  | 14 | 2.22 | 0.0053 |
| GO:0009073 | aromatic amino acid family biosynthetic process                           | 0.006 | 0.003 | 7  | 14 | 2.22 | 0.0053 |
| GO:0006376 | mRNA splice site selection                                                | 0.006 | 0.003 | 7  | 14 | 2.22 | 0.0053 |
| GO:0006353 | transcription termination                                                 | 0.006 | 0.003 | 7  | 14 | 2.22 | 0.0053 |
| GO:0030014 | CCR4-NOT complex                                                          | 0.004 | 0.002 | 5  | 9  | 2.46 | 0.0058 |
| GO:0006207 | 'de novo' pyrimidine base biosynthetic process                            | 0.004 | 0.002 | 5  | 9  | 2.46 | 0.0058 |
| GO:0006606 | protein import into nucleus                                               | 0.005 | 0.002 | 6  | 12 | 2.22 | 0.0079 |
| GO:0006740 | NADPH regeneration                                                        | 0.006 | 0.003 | 7  | 15 | 2.07 | 0.0091 |
| GO:0051205 | protein insertion into membrane                                           | 0.006 | 0.003 | 7  | 15 | 2.07 | 0.0091 |
| GO:0043021 | ribonucleoprotein binding                                                 | 0.006 | 0.003 | 7  | 15 | 2.07 | 0.0091 |
| GO:0003711 | transcription elongation regulator activity                               | 0.006 | 0.003 | 7  | 15 | 2.07 | 0.0091 |
| GO:0005750 | mitochondrial respiratory chain complex III                               | 0.004 | 0.002 | 5  | 10 | 2.22 | 0.0118 |
| GO:0000120 | RNA polymerase I transcription factor complex                             | 0.004 | 0.002 | 5  | 10 | 2.22 | 0.0118 |
| GO:0019856 | pyrimidine base biosynthetic process                                      | 0.004 | 0.002 | 5  | 10 | 2.22 | 0.0118 |
| GO:0006369 | termination of RNA polymerase II transcription                            | 0.004 | 0.002 | 5  | 10 | 2.22 | 0.0118 |
| GO:0016884 | carbon-nitrogen ligase activity, with glutamine as amido-N-donor          | 0.005 | 0.003 | 6  | 13 | 2.05 | 0.0138 |
| GO:0051605 | protein maturation by peptide bond cleavage                               | 0.005 | 0.003 | 6  | 13 | 2.05 | 0.0138 |
| GO:0043628 | ncRNA 3'-end processing                                                   | 0.004 | 0.002 | 5  | 11 | 2.01 | 0.0210 |
| GO:0006526 | arginine biosynthetic process                                             | 0.004 | 0.002 | 5  | 11 | 2.01 | 0.0210 |
| GO:0006098 | pentose-phosphate shunt                                                   | 0.004 | 0.002 | 5  | 11 | 2.01 | 0.0210 |
| GO:0042125 | protein galactosylation                                                   | 0.004 | 0.002 | 5  | 11 | 2.01 | 0.0210 |



**Table S3. GO terms enriched in H4K20me2-associated genes**

| <b>GO_term</b> | <b>description</b>                                                                    | <b>fraction in selection</b> | <b>fraction total</b> | <b># in selection (&gt;0.5)</b> | <b># total in GO term</b> | <b>enrichment</b> | <b>P-value</b> |
|----------------|---------------------------------------------------------------------------------------|------------------------------|-----------------------|---------------------------------|---------------------------|-------------------|----------------|
| GO:0006298     | mismatch repair                                                                       | 0.009                        | 0.002                 | 7                               | 11                        | 4.44              | 1.9E-05        |
| GO:0005643     | nuclear pore                                                                          | 0.024                        | 0.01                  | 18                              | 51                        | 2.46              | 4.0E-05        |
| GO:0008033     | tRNA processing                                                                       | 0.034                        | 0.017                 | 25                              | 87                        | 2.00              | 1.3E-04        |
| GO:0030983     | mismatched DNA binding                                                                | 0.007                        | 0.002                 | 5                               | 8                         | 4.36              | 1.9E-04        |
| GO:0032266     | phosphatidylinositol-3-phosphate binding                                              | 0.007                        | 0.002                 | 5                               | 9                         | 3.87              | 4.9E-04        |
| GO:0031047     | gene silencing by RNA                                                                 | 0.012                        | 0.004                 | 9                               | 23                        | 2.73              | 6.8E-04        |
| GO:0004843     | ubiquitin-specific protease activity                                                  | 0.014                        | 0.005                 | 10                              | 27                        | 2.58              | 7.1E-04        |
| GO:0005669     | transcription factor TFIID complex                                                    | 0.009                        | 0.003                 | 7                               | 17                        | 2.87              | 0.0013         |
| GO:0000032     | cell wall mannoprotein biosynthetic process                                           | 0.007                        | 0.002                 | 5                               | 11                        | 3.17              | 0.0021         |
| GO:0035268     | protein mannosylation                                                                 | 0.007                        | 0.002                 | 5                               | 11                        | 3.17              | 0.0021         |
| GO:0031048     | chromatin silencing by small RNA                                                      | 0.008                        | 0.003                 | 6                               | 15                        | 2.79              | 0.0027         |
| GO:0004221     | ubiquitin thiolesterase activity                                                      | 0.009                        | 0.004                 | 7                               | 19                        | 2.57              | 0.0030         |
| GO:0048278     | vesicle docking                                                                       | 0.008                        | 0.003                 | 6                               | 16                        | 2.61              | 0.0043         |
| GO:0051285     | cell cortex of cell tip                                                               | 0.012                        | 0.006                 | 9                               | 29                        | 2.16              | 0.0053         |
| GO:0005099     | Ras GTPase activator activity                                                         | 0.011                        | 0.005                 | 8                               | 25                        | 2.23              | 0.0058         |
| GO:0003690     | double-stranded DNA binding                                                           | 0.009                        | 0.004                 | 7                               | 21                        | 2.32              | 0.0062         |
| GO:0032319     | regulation of Rho GTPase activity                                                     | 0.008                        | 0.003                 | 6                               | 17                        | 2.46              | 0.0064         |
| GO:0006896     | Golgi to vacuole transport                                                            | 0.008                        | 0.003                 | 6                               | 17                        | 2.46              | 0.0064         |
| GO:0031390     | Ctf18 RFC-like complex                                                                | 0.007                        | 0.003                 | 5                               | 14                        | 2.49              | 0.0092         |
| GO:0030261     | chromosome condensation                                                               | 0.008                        | 0.004                 | 6                               | 19                        | 2.20              | 0.0128         |
| GO:0016050     | vesicle organization                                                                  | 0.008                        | 0.004                 | 6                               | 19                        | 2.20              | 0.0128         |
| GO:0071937     | barrier septum formation involved in cell cycle cytokinesis                           | 0.008                        | 0.004                 | 6                               | 19                        | 2.20              | 0.0128         |
| GO:0035023     | regulation of Rho protein signal transduction                                         | 0.008                        | 0.004                 | 6                               | 19                        | 2.20              | 0.0128         |
| GO:0015662     | ATPase activity, coupled to transmembrane movement of ions, phosphorylative mechanism | 0.007                        | 0.003                 | 5                               | 15                        | 2.32              | 0.0135         |
| GO:0031321     | ascospore-type prospore formation                                                     | 0.008                        | 0.004                 | 6                               | 20                        | 2.09              | 0.0173         |
| GO:0031134     | sister chromatid biorientation                                                        | 0.007                        | 0.003                 | 5                               | 17                        | 2.05              | 0.0259         |

**Table S4. GO terms enriched in H4K20me3-associated genes**

| <b>GO_term</b> | <b>description</b>                                   | <b>fraction in selection</b> | <b>fraction total</b> | <b># in selection (&gt;0.5)</b> | <b># total in GO term</b> | <b>enrichment</b> | <b>P-value</b> |
|----------------|------------------------------------------------------|------------------------------|-----------------------|---------------------------------|---------------------------|-------------------|----------------|
| GO:0004386     | helicase activity                                    | 0.063                        | 0.018                 | 32                              | 92                        | 3.51              | 1.1E-11        |
| GO:0008026     | ATP-dependent helicase activity                      | 0.057                        | 0.016                 | 29                              | 82                        | 3.57              | 4.9E-11        |
| GO:0008094     | DNA-dependent ATPase activity                        | 0.047                        | 0.012                 | 24                              | 61                        | 3.98              | 1.3E-10        |
| GO:0016462     | pyrophosphatase activity                             | 0.132                        | 0.062                 | 67                              | 318                       | 2.13              | 2.1E-10        |
| GO:0017111     | nucleoside-triphosphatase activity                   | 0.124                        | 0.058                 | 63                              | 297                       | 2.14              | 5.4E-10        |
| GO:0006200     | ATP catabolic process                                | 0.09                         | 0.036                 | 46                              | 187                       | 2.49              | 6.8E-10        |
| GO:0016887     | ATPase activity                                      | 0.102                        | 0.044                 | 52                              | 227                       | 2.32              | 9.4E-10        |
| GO:0004003     | ATP-dependent DNA helicase activity                  | 0.035                        | 0.008                 | 18                              | 40                        | 4.55              | 1.1E-09        |
| GO:0003678     | DNA helicase activity                                | 0.035                        | 0.008                 | 18                              | 42                        | 4.33              | 3.0E-09        |
| GO:0042623     | ATPase activity, coupled                             | 0.077                        | 0.032                 | 39                              | 167                       | 2.36              | 5.9E-08        |
| GO:0007062     | sister chromatid cohesion                            | 0.024                        | 0.006                 | 12                              | 29                        | 4.18              | 1.2E-06        |
| GO:0007126     | meiosis                                              | 0.079                        | 0.038                 | 40                              | 194                       | 2.08              | 1.5E-06        |
| GO:0006974     | response to DNA damage stimulus                      | 0.084                        | 0.042                 | 43                              | 216                       | 2.01              | 1.7E-06        |
| GO:0008278     | cohesin complex                                      | 0.012                        | 0.002                 | 6                               | 9                         | 6.74              | 2.7E-06        |
| GO:0005086     | ARF guanyl-nucleotide exchange factor activity       | 0.01                         | 0.001                 | 5                               | 7                         | 7.22              | 5.9E-06        |
| GO:0006281     | DNA repair                                           | 0.065                        | 0.031                 | 33                              | 157                       | 2.12              | 6.9E-06        |
| GO:0004556     | alpha-amylase activity                               | 0.012                        | 0.002                 | 6                               | 10                        | 6.06              | 8.2E-06        |
| GO:0007064     | mitotic sister chromatid cohesion                    | 0.012                        | 0.002                 | 6                               | 12                        | 5.05              | 4.5E-05        |
| GO:0045143     | homologous chromosome segregation                    | 0.016                        | 0.004                 | 8                               | 20                        | 4.04              | 5.3E-05        |
| GO:0044264     | cellular polysaccharide metabolic process            | 0.033                        | 0.013                 | 17                              | 67                        | 2.56              | 5.7E-05        |
| GO:0000084     | S phase of mitotic cell cycle                        | 0.016                        | 0.004                 | 8                               | 21                        | 3.85              | 8.4E-05        |
| GO:0006310     | DNA recombination                                    | 0.045                        | 0.021                 | 23                              | 107                       | 2.17              | 8.7E-05        |
| GO:0048015     | phosphoinositide-mediated signaling                  | 0.014                        | 0.003                 | 7                               | 17                        | 4.16              | 9.4E-05        |
| GO:0046379     | extracellular polysaccharide metabolic process       | 0.018                        | 0.005                 | 9                               | 26                        | 3.50              | 1.0E-04        |
| GO:0005657     | replication fork                                     | 0.031                        | 0.012                 | 16                              | 64                        | 2.53              | 1.1E-04        |
| GO:0004553     | hydrolase activity, hydrolyzing O-glycosyl compounds | 0.026                        | 0.009                 | 13                              | 48                        | 2.74              | 1.5E-04        |
| GO:0044247     | cellular polysaccharide catabolic process            | 0.012                        | 0.003                 | 6                               | 14                        | 4.33              | 1.6E-04        |

|            |                                                             |       |       |    |     |      |         |
|------------|-------------------------------------------------------------|-------|-------|----|-----|------|---------|
| GO:0030437 | ascospore formation                                         | 0.043 | 0.02  | 22 | 105 | 2.12 | 1.8E-04 |
| GO:0016567 | protein ubiquitination                                      | 0.049 | 0.024 | 25 | 126 | 2.01 | 1.9E-04 |
| GO:0043596 | nuclear replication fork                                    | 0.028 | 0.011 | 14 | 56  | 2.53 | 2.4E-04 |
| GO:0000723 | telomere maintenance                                        | 0.028 | 0.011 | 14 | 56  | 2.53 | 2.4E-04 |
| GO:0016577 | histone demethylation                                       | 0.01  | 0.002 | 5  | 11  | 4.59 | 2.7E-04 |
| GO:0003724 | RNA helicase activity                                       | 0.022 | 0.008 | 11 | 41  | 2.71 | 4.2E-04 |
| GO:0007127 | meiosis I                                                   | 0.037 | 0.018 | 19 | 91  | 2.11 | 4.5E-04 |
| GO:0005085 | guanyl-nucleotide exchange factor activity                  | 0.02  | 0.007 | 10 | 36  | 2.81 | 4.8E-04 |
| GO:0070988 | demethylation                                               | 0.01  | 0.002 | 5  | 12  | 4.21 | 5.0E-04 |
| GO:0016798 | hydrolase activity, acting on glycosyl bonds                | 0.028 | 0.012 | 14 | 60  | 2.36 | 5.5E-04 |
| GO:0045132 | meiotic chromosome segregation                              | 0.028 | 0.012 | 14 | 60  | 2.36 | 5.5E-04 |
| GO:0000781 | chromosome, telomeric region                                | 0.022 | 0.008 | 11 | 43  | 2.59 | 6.7E-04 |
| GO:0006312 | mitotic recombination                                       | 0.012 | 0.003 | 6  | 17  | 3.57 | 7.2E-04 |
| GO:0003774 | motor activity                                              | 0.012 | 0.003 | 6  | 17  | 3.57 | 7.2E-04 |
| GO:0032012 | regulation of ARF protein signal transduction               | 0.01  | 0.003 | 5  | 13  | 3.89 | 8.5E-04 |
| GO:0003887 | DNA-directed DNA polymerase activity                        | 0.012 | 0.003 | 6  | 18  | 3.37 | 0.0011  |
| GO:0008186 | RNA-dependent ATPase activity                               | 0.02  | 0.008 | 10 | 40  | 2.53 | 0.0013  |
| GO:0004004 | ATP-dependent RNA helicase activity                         | 0.02  | 0.008 | 10 | 40  | 2.53 | 0.0013  |
| GO:0016298 | lipase activity                                             | 0.014 | 0.005 | 7  | 24  | 2.95 | 0.0015  |
| GO:0007131 | reciprocal meiotic recombination                            | 0.024 | 0.01  | 12 | 53  | 2.29 | 0.0015  |
| GO:0030476 | ascospore wall assembly                                     | 0.012 | 0.004 | 6  | 19  | 3.19 | 0.0016  |
| GO:0000151 | ubiquitin ligase complex                                    | 0.026 | 0.012 | 13 | 60  | 2.19 | 0.0017  |
| GO:0016042 | lipid catabolic process                                     | 0.014 | 0.005 | 7  | 25  | 2.83 | 0.0021  |
| GO:0000109 | nucleotide-excision repair complex                          | 0.012 | 0.004 | 6  | 20  | 3.03 | 0.0022  |
| GO:0007088 | regulation of mitosis                                       | 0.026 | 0.012 | 13 | 63  | 2.09 | 0.0028  |
| GO:0048278 | vesicle docking                                             | 0.01  | 0.003 | 5  | 16  | 3.16 | 0.0031  |
| GO:0031933 | telomeric heterochromatin                                   | 0.01  | 0.003 | 5  | 16  | 3.16 | 0.0031  |
| GO:0006301 | postreplication repair                                      | 0.01  | 0.003 | 5  | 16  | 3.16 | 0.0031  |
|            | negative regulation of transcription from RNA polymerase II |       |       |    |     |      |         |
| GO:0000122 | promoter                                                    | 0.018 | 0.008 | 9  | 39  | 2.33 | 0.0037  |
| GO:0051783 | regulation of nuclear division                              | 0.026 | 0.013 | 13 | 65  | 2.02 | 0.0038  |

|            |                                                              |       |       |    |    |      |        |
|------------|--------------------------------------------------------------|-------|-------|----|----|------|--------|
| GO:0007031 | peroxisome organization                                      | 0.012 | 0.004 | 6  | 22 | 2.76 | 0.0041 |
| GO:0019932 | second-messenger-mediated signaling                          | 0.02  | 0.009 | 10 | 46 | 2.20 | 0.0043 |
| GO:0008608 | attachment of spindle microtubules to kinetochore            | 0.014 | 0.005 | 7  | 28 | 2.53 | 0.0045 |
| GO:0006289 | nucleotide-excision repair                                   | 0.014 | 0.005 | 7  | 28 | 2.53 | 0.0045 |
| GO:0004091 | carboxylesterase activity                                    | 0.012 | 0.005 | 6  | 24 | 2.53 | 0.0069 |
| GO:0000725 | recombinational repair                                       | 0.016 | 0.007 | 8  | 36 | 2.25 | 0.0070 |
| GO:0030261 | chromosome condensation                                      | 0.01  | 0.004 | 5  | 19 | 2.66 | 0.0080 |
| GO:0040020 | regulation of meiosis                                        | 0.01  | 0.004 | 5  | 19 | 2.66 | 0.0080 |
| GO:0040023 | establishment of nucleus localization                        | 0.01  | 0.004 | 5  | 19 | 2.66 | 0.0080 |
| GO:0090307 | spindle assembly involved in mitosis                         | 0.01  | 0.004 | 5  | 19 | 2.66 | 0.0080 |
| GO:0000784 | nuclear chromosome, telomeric region                         | 0.01  | 0.004 | 5  | 19 | 2.66 | 0.0080 |
| GO:0009250 | glucan biosynthetic process                                  | 0.014 | 0.006 | 7  | 31 | 2.28 | 0.0088 |
|            | maintenance of fidelity involved in DNA-dependent DNA        |       |       |    |    |      |        |
| GO:0045005 | replication                                                  | 0.014 | 0.006 | 7  | 31 | 2.28 | 0.0088 |
| GO:0000724 | double-strand break repair via homologous recombination      | 0.014 | 0.006 | 7  | 31 | 2.28 | 0.0088 |
| GO:0006302 | double-strand break repair                                   | 0.018 | 0.009 | 9  | 44 | 2.07 | 0.0093 |
| GO:0007533 | mating type switching                                        | 0.01  | 0.004 | 5  | 20 | 2.53 | 0.011  |
| GO:0007531 | mating type determination                                    | 0.012 | 0.005 | 6  | 26 | 2.33 | 0.011  |
| GO:0000792 | heterochromatin                                              | 0.014 | 0.006 | 7  | 33 | 2.14 | 0.013  |
| GO:0035091 | phosphoinositide binding                                     | 0.014 | 0.006 | 7  | 33 | 2.14 | 0.013  |
| GO:0005875 | microtubule associated complex                               | 0.01  | 0.004 | 5  | 21 | 2.41 | 0.014  |
| GO:0003690 | double-stranded DNA binding                                  | 0.01  | 0.004 | 5  | 21 | 2.41 | 0.014  |
|            | negative regulation of gene-specific transcription from RNA  |       |       |    |    |      |        |
| GO:0010553 | polymerase II promoter                                       | 0.01  | 0.004 | 5  | 21 | 2.41 | 0.014  |
| GO:0016891 | endoribonuclease activity, producing 5'-phosphomonoesters    | 0.01  | 0.004 | 5  | 21 | 2.41 | 0.014  |
| GO:0007094 | mitotic cell cycle spindle assembly checkpoint               | 0.012 | 0.005 | 6  | 28 | 2.17 | 0.017  |
| GO:0008194 | UDP-glycosyltransferase activity                             | 0.012 | 0.005 | 6  | 28 | 2.17 | 0.017  |
| GO:0005628 | prospore membrane                                            | 0.01  | 0.004 | 5  | 22 | 2.30 | 0.017  |
| GO:0051445 | regulation of meiotic cell cycle                             | 0.01  | 0.004 | 5  | 22 | 2.30 | 0.017  |
| GO:0030466 | chromatin silencing at silent mating-type cassette           | 0.014 | 0.007 | 7  | 35 | 2.02 | 0.019  |
| GO:0045839 | negative regulation of mitosis                               | 0.012 | 0.006 | 6  | 29 | 2.09 | 0.020  |
| GO:0045841 | negative regulation of mitotic metaphase/anaphase transition | 0.012 | 0.006 | 6  | 29 | 2.09 | 0.020  |

|            |                                       |       |       |   |    |      |       |
|------------|---------------------------------------|-------|-------|---|----|------|-------|
| GO:0006090 | pyruvate metabolic process            | 0.012 | 0.006 | 6 | 29 | 2.09 | 0.020 |
| GO:0031577 | spindle checkpoint                    | 0.012 | 0.006 | 6 | 29 | 2.09 | 0.020 |
| GO:0031047 | gene silencing by RNA                 | 0.01  | 0.004 | 5 | 23 | 2.20 | 0.021 |
| GO:0044242 | cellular lipid catabolic process      | 0.01  | 0.004 | 5 | 23 | 2.20 | 0.021 |
| GO:0004521 | endoribonuclease activity             | 0.012 | 0.006 | 6 | 30 | 2.02 | 0.024 |
| GO:0006887 | exocytosis                            | 0.012 | 0.006 | 6 | 30 | 2.02 | 0.024 |
| GO:0005777 | peroxisome                            | 0.01  | 0.005 | 5 | 24 | 2.11 | 0.026 |
| GO:0031261 | DNA replication preinitiation complex | 0.01  | 0.005 | 5 | 24 | 2.11 | 0.026 |
| GO:0016564 | transcription repressor activity      | 0.01  | 0.005 | 5 | 24 | 2.11 | 0.026 |

**Table S5** Gene ontology terms enriched in H4K20me3 signal ( $\log_2(\text{WT}/\text{set9}\Delta) > 0.5$ )

| GO term    | Description                        | Enrichment* | N° genes** | P-value  |
|------------|------------------------------------|-------------|------------|----------|
| GO:0016462 | pyrophosphatase activity           | 2.1         | 67         | <0.00001 |
| GO:0017111 | nucleoside-triphosphatase activity | 2.1         | 63         | <0.00001 |
| GO:0006200 | ATP catabolic process              | 2.5         | 46         | <0.00001 |
| GO:0016887 | ATPase activity                    | 2.3         | 52         | <0.00001 |
| GO:0042623 | ATPase activity, coupled           | 2.4         | 39         | <0.00001 |
| GO:0007126 | meiosis                            | 2.1         | 40         | <0.00001 |
| GO:0006974 | response to DNA damage stimulus    | 2.0         | 43         | <0.00001 |
| GO:0006281 | DNA repair                         | 2.1         | 33         | 0.00001  |
| GO:0006310 | DNA recombination                  | 2.2         | 23         | 0.00009  |
| GO:0030437 | ascospore formation                | 2.1         | 22         | 0.00018  |
| GO:0016567 | protein ubiquitination             | 2.0         | 25         | 0.00019  |

\* Calculated as (genes of GO term in selection/total genes of GO term)/(genes in selection/total protein coding genes).

\*\* Genes with H4K20me3 signal (WT–set9Δ) and belonging to the specific GO term.

**Table S6. GO terms enriched in genes expressed at same levels as H4K20me3 associated**

| <b>GO_term</b> | <b>description</b>                    | <b>fraction in selection</b> | <b>fraction total</b> | <b># in selection</b> | <b># total in GO term</b> | <b>enrichment</b> | <b>P-value</b> |
|----------------|---------------------------------------|------------------------------|-----------------------|-----------------------|---------------------------|-------------------|----------------|
| GO:0034470     | ncRNA processing                      | 0.082                        | 0.039                 | 26                    | 250                       | 2.12              | 4.2E-04        |
| GO:0006396     | RNA processing                        | 0.117                        | 0.069                 | 37                    | 447                       | 1.68              | 1.5E-03        |
| GO:0034660     | ncRNA metabolic process               | 0.085                        | 0.045                 | 27                    | 291                       | 1.89              | 1.8E-03        |
| GO:0016298     | lipase activity                       | 0.019                        | 0.003                 | 6                     | 23                        | 5.53              | 3.6E-03        |
| GO:0006473     | protein amino acid acetylation        | 0.028                        | 0.008                 | 9                     | 54                        | 3.39              | 4.3E-03        |
| GO:0016072     | rRNA metabolic process                | 0.057                        | 0.027                 | 18                    | 173                       | 2.12              | 4.3E-03        |
| GO:0016042     | lipid catabolic process               | 0.019                        | 0.004                 | 6                     | 25                        | 4.88              | 6.4E-03        |
| GO:0006364     | rRNA processing                       | 0.054                        | 0.027                 | 17                    | 172                       | 2.01              | 9.3E-03        |
| GO:0043543     | protein amino acid acylation          | 0.028                        | 0.010                 | 9                     | 62                        | 2.95              | 9.9E-03        |
| GO:0042254     | ribosome biogenesis                   | 0.066                        | 0.036                 | 21                    | 235                       | 1.82              | 1.0E-02        |
| GO:0003724     | RNA helicase activity                 | 0.022                        | 0.006                 | 7                     | 41                        | 3.62              | 1.1E-02        |
| GO:0016192     | vesicle-mediated transport            | 0.073                        | 0.042                 | 23                    | 269                       | 1.74              | 1.1E-02        |
| GO:0016573     | histone acetylation                   | 0.022                        | 0.006                 | 7                     | 41                        | 3.47              | 1.4E-02        |
| GO:0046486     | glycerolipid metabolic process        | 0.032                        | 0.013                 | 10                    | 84                        | 2.42              | 2.1E-02        |
| GO:0016887     | ATPase activity                       | 0.057                        | 0.032                 | 18                    | 217                       | 1.76              | 2.4E-02        |
| GO:0006400     | tRNA modification                     | 0.025                        | 0.009                 | 8                     | 59                        | 2.76              | 2.4E-02        |
| GO:0022613     | ribonucleoprotein complex biogenesis  | 0.066                        | 0.040                 | 21                    | 258                       | 1.66              | 2.6E-02        |
| GO:0000123     | histone acetyltransferase complex     | 0.022                        | 0.007                 | 7                     | 37                        | 3.00              | 2.6E-02        |
| GO:0016570     | histone modification                  | 0.035                        | 0.016                 | 11                    | 102                       | 2.19              | 2.6E-02        |
| GO:0016569     | covalent chromatin modification       | 0.035                        | 0.016                 | 11                    | 102                       | 2.19              | 2.6E-02        |
| GO:0004091     | carboxylesterase activity             | 0.016                        | 0.004                 | 5                     | 25                        | 4.24              | 2.7E-02        |
| GO:0044242     | cellular lipid catabolic process      | 0.016                        | 0.004                 | 5                     | 24                        | 4.24              | 2.7E-02        |
| GO:0006650     | glycerophospholipid metabolic process | 0.028                        | 0.012                 | 9                     | 77                        | 2.38              | 3.3E-02        |
| GO:0016791     | phosphatase activity                  | 0.025                        | 0.010                 | 8                     | 67                        | 2.53              | 3.6E-02        |
| GO:0004004     | ATP-dependent RNA helicase activity   | 0.019                        | 0.006                 | 6                     | 40                        | 3.18              | 3.7E-02        |
| GO:0008186     | RNA-dependent ATPase activity         | 0.019                        | 0.006                 | 6                     | 40                        | 3.18              | 3.7E-02        |
| GO:0009310     | amine catabolic process               | 0.019                        | 0.006                 | 6                     | 41                        | 2.98              | 4.8E-02        |
| GO:0046872     | metal ion binding                     | 0.136                        | 0.105                 | 43                    | 708                       | 1.29              | 5.2E-02        |
| GO:0006644     | phospholipid metabolic process        | 0.028                        | 0.013                 | 9                     | 86                        | 2.13              | 5.8E-02        |

|            |                                                |       |       |    |     |      |         |
|------------|------------------------------------------------|-------|-------|----|-----|------|---------|
| GO:0032543 | mitochondrial translation                      | 0.035 | 0.018 | 11 | 117 | 1.91 | 5.9E-02 |
| GO:0006399 | tRNA metabolic process                         | 0.038 | 0.021 | 12 | 133 | 1.84 | 5.9E-02 |
| GO:0008026 | ATP-dependent helicase activity                | 0.025 | 0.011 | 8  | 76  | 2.23 | 6.3E-02 |
| GO:0070035 | purine NTP-dependent helicase activity         | 0.025 | 0.011 | 8  | 76  | 2.23 | 6.3E-02 |
| GO:0016879 | ligase activity, forming carbon-nitrogen bonds | 0.038 | 0.021 | 12 | 142 | 1.79 | 6.7E-02 |
| GO:0043169 | cation binding                                 | 0.136 | 0.107 | 43 | 722 | 1.26 | 6.8E-02 |
| GO:0019637 | organophosphate metabolic process              | 0.028 | 0.014 | 9  | 89  | 2.06 | 6.8E-02 |
| GO:0043167 | ion binding                                    | 0.136 | 0.108 | 43 | 724 | 1.26 | 7.0E-02 |
| GO:0008033 | tRNA processing                                | 0.028 | 0.014 | 9  | 90  | 2.03 | 7.2E-02 |
| GO:0009451 | RNA modification                               | 0.025 | 0.012 | 8  | 76  | 2.14 | 7.7E-02 |
| GO:0016881 | acid-amino acid ligase activity                | 0.032 | 0.017 | 10 | 115 | 1.84 | 8.8E-02 |
| GO:0016568 | chromatin modification                         | 0.047 | 0.031 | 15 | 197 | 1.55 | 1.0E-01 |

**Table S7. *S. pombe* strains used in this study.**

| Strain              | Genotype                                                                                              | Reference          |
|---------------------|-------------------------------------------------------------------------------------------------------|--------------------|
| Hu0303              | <i>h-</i> , 972                                                                                       |                    |
| Hu0029              | <i>h-</i> , <i>ade6-M210 leu1-32 ura4-D18</i>                                                         |                    |
| Hu2549<br>(=A8894)  | <i>h+</i> <i>ars1 :prad15 cre-EBD-LEU2, H3.2-lox-HA-hygR-Lox-T7, cdc25-22 (ts), ade6-210, leu1-32</i> | This study         |
| Hu2653              | <i>h-</i> , <i>leu1-32, ura4-DS/E, ade6-M216, pInv1-H3-HA</i>                                         | Sadeghi et al 2014 |
| Hu1654<br>(=YSL252) | <i>h-</i> , <i>set9::kanMX</i>                                                                        | SL Sanders         |
| Hu2095<br>(=FYA259) | <i>h-</i> , <i>spt16-18:kanMX6, leu1-32</i>                                                           | RC Allshire        |
| Hu2640              | <i>h+</i> , <i>ade6-M216, leu1-32, ura4-DS/E, otrR(Sph1)::ura4, htb1-K119R::kanMX6</i>                | SI Grewal          |
| 167                 | <i>h+</i> , <i>htb1+:kanMX6, spt16-myc::hphMX6</i>                                                    | JC Tanny           |

**Table S8. Sequencing statistics for ChIP-exo samples after Bowtie2 alignment to ASM294v2 assembly of *S. pombe* genome**

| <b>Sample</b><br>(time_epitope_replicate) | <b>total number<br/>of reads</b><br>( $\times 10^6$ ) | <b>aligning<br/>exactly 1 time</b><br>( $\times 10^6$ ) | <b>aligned<br/>&gt;1 times</b><br>( $\times 10^6$ ) | <b>overall<br/>alignment rate</b> | <b>coverage</b><br>(# reads/nucleosome<br>(150bp)) |
|-------------------------------------------|-------------------------------------------------------|---------------------------------------------------------|-----------------------------------------------------|-----------------------------------|----------------------------------------------------|
| 0h HA_1                                   | 17.63                                                 | 15.56                                                   | 1.02                                                | 94.1%                             | 165.8                                              |
| 2h HA_1                                   | 16.89                                                 | 14.98                                                   | 0.94                                                | 94.3%                             | 159.2                                              |
| 0h T7_1                                   | 0.36                                                  | 0.31                                                    | 0.02                                                | 91.4%                             | 3.3                                                |
| 2h T7_1                                   | 13.64                                                 | 12.03                                                   | 0.74                                                | 93.6%                             | 127.7                                              |
| 0h HA_2                                   | 16.33                                                 | 14.33                                                   | 0.95                                                | 93.6%                             | 152.8                                              |
| 2h HA_2                                   | 17.78                                                 | 15.69                                                   | 1.04                                                | 94.1%                             | 167.3                                              |
| 0h T7_2                                   | 3.70                                                  | 2.99                                                    | 0.21                                                | 86.6%                             | 32.0                                               |
| 2h T7_2                                   | 14.99                                                 | 13.10                                                   | 0.70                                                | 92.1%                             | 138.0                                              |
